5  
10  
**Phenotypical Rescue of Bmp15 Deficiency by Mutation of Inhibin  $\alpha$  (*inha*) Provides Novel Clues to How Bmp15 Controls Zebrafish Folliculogenesis**

Yue Zhai, Cheng Zhao, Ruijing Geng, Kun Wu, Mingzhe Yuan, Nana Ai and Wei Ge\*

10  
Department of Biomedical Sciences and Centre of Reproduction, Development and Aging (CRDA), Faculty of Health Sciences, University of Macau, Taipa, Macau SAR, China

15  
**Key words:** BMP15, inhibin, activin, estrogen, aromatase *cyp19a1a*, vitellogenin, folliculogenesis, zebrafish

**Running title:** Role of BMP15 in zebrafish folliculogenesis

20  
Conflict of Interest: The authors declare no conflict of interest.

\*Corresponding author:

25 Wei Ge, Faculty of Health Sciences, University of Macau, Taipa, Macau, China;

Tel: +853-8822-4996; Email: [weige@um.edu.mo](mailto:weige@um.edu.mo)/[gezebrafish@gmail.com](mailto:gezebrafish@gmail.com)

## 30 Abstract

As an oocyte-specific growth factor, bone morphogenetic protein 15 (BMP15) plays a critical role in controlling folliculogenesis. However, the mechanism of BMP15 action remains elusive. Using zebrafish as the model, we created a *bmp15* mutant using CRISPR/Cas9 and demonstrated that *bmp15* deficiency caused a significant delay in  
35 follicle activation and puberty onset followed by complete arrest of follicle development at previtellogenic stage without yolk accumulation. The mutant females eventually underwent female-to-male sex reversal to become functional males, which was accompanied by a series of changes in secondary sexual characteristics. Interestingly, the blockade of folliculogenesis and sex reversal in *bmp15* mutant could  
40 be rescued by the loss of inhibin (*inha*<sup>-/-</sup>). The follicles of double mutant (*bmp15*<sup>-/-</sup>;*inha*<sup>-/-</sup>) could progress to mid-vitellogenic stage with yolk accumulation and the fish maintained their femaleness without sex reversal. Transcriptome analysis revealed up-regulation of pathways related to TGF- $\beta$  signaling and endocytosis in the double mutant follicles. Intriguingly, the expression of inhibin/activin  $\beta$ Aa subunit (*inhbaa*) increased  
45 significantly in the double mutant ovary. Further knockout of *inhbaa* in the triple mutant (*bmp15*<sup>-/-</sup>;*inha*<sup>-/-</sup>;*inhbaa*<sup>-/-</sup>) resulted in the loss of yolk granules again in the oocytes although the follicles could continue to grow beyond the size range of previtellogenic stage. The serum levels of estradiol (E2) and vitellogenin (Vtg) both decreased significantly in *bmp15* single mutant females, returned to normal in the  
50 double mutant (*bmp15*<sup>-/-</sup>;*inha*<sup>-/-</sup>), but reduced again significantly in the triple mutant (*bmp15*<sup>-/-</sup>;*inha*<sup>-/-</sup>;*inhbaa*<sup>-/-</sup>). E2 treatment could rescue the vitellogenic follicles in *bmp15*<sup>-/-</sup>, and fadrozole (a nonsteroidal aromatase inhibitor) treatment blocked yolk accumulation in *bmp15*<sup>-/-</sup>;*inha*<sup>-/-</sup> fish. In summary, the present study provided comprehensive genetic evidence for the interaction of *bmp15* pathways and the activin-inhibin system in regulating folliculogenesis, in particular E2 production from the  
55 follicle, Vtg biosynthesis in the liver and its update by the developing oocytes.

## Introduction

60 As basic structural and functional units of the ovary, follicles in vertebrates consist of  
a developing oocyte and surrounding somatic follicle cells (granulosa and theca cells)  
(Gilchrist et al., 2008). The development of follicles, or folliculogenesis, is a multistage  
dynamic process involving dramatic structural and functional changes (Monniaux,  
2016). Folliculogenesis is primarily controlled by the hypothalamus-pituitary-gonad  
(HPG) axis (Baerwald et al., 2012). Two gonadotropins from the pituitary, follicle-  
65 stimulating hormone (FSH) and luteinizing hormone (LH), play pivotal roles in  
regulating folliculogenesis in all vertebrates including fish (Chen and Ge, 2012; Hillier,  
1994; Palermo, 2007; Swanson et al., 2003). However, it is also well known that various  
local factors from the ovary are also involved in regulating folliculogenesis in autocrine  
and/or paracrine manners (Ge, 2005; Orisaka et al., 2021; Sutton et al., 2003). One of  
70 the most important discoveries in female reproductive biology in the past two decades  
is that the oocyte serves as a controlling centre during folliculogenesis by releasing a  
variety of peptide growth factors (Eppig, 2001; Erickson and Shimasaki, 2001; Matzuk  
et al., 2002), among which growth differentiation factor 9 (GDF9) and bone  
morphogenetic protein 15 (BMP15 or GDF9B) are the best characterized. The  
75 discovery and characterization of these two factors have changed the traditional view  
that the oocyte is passively regulated by external factors either from the circulation or  
the surrounding follicle cells during folliculogenesis.

Both GDF9 and BMP15 belong to the transforming growth factor  $\beta$  (TGF- $\beta$ )  
superfamily, whose members play critical roles in development and reproduction  
80 (Knight and Glister, 2006; Zinski et al., 2018). As the first oocyte-specific growth  
factor discovered, GDF9 has been well studied in both mammals and fish (Carabatsos  
et al., 1998; Chen et al., 2017b; Dong et al., 1996; He et al., 2012; Liu and Ge, 2007;  
McPherron and Lee, 1993). The knockout of GDF9 in mice arrested folliculogenesis at  
primary follicle stage, resulting in female infertility (Dong et al., 1996). In zebrafish,  
85 the loss of *Gdf9* also caused a complete blockade of follicle development at primary  
growth (PG) stage, similar to that in mice (Chen et al., 2022), suggesting a conserved  
role for GDF9 in controlling early folliculogenesis in vertebrates. Shortly after the  
discovery of GDF9, a second oocyte-specific member of the TGF- $\beta$  family, namely  
BMP15, was identified in mice and humans by homology-based PCR cloning and  
90 hybridization. Both human (*BMP15*) and mouse (*Bmp15*) genes are X-linked and also  
expressed exclusively in the oocyte (Dube et al., 1998). Experimental evidence has  
shown that BMP15 is involved in regulating the entire process of folliculogenesis from  
early follicle development to ovulation. In preantral stage, BMP15 maintained follicle  
integrity in vitro and promoted formation of secondary follicles (Celestino et al., 2011)  
95 as well as antral formation (Lima et al., 2012). In antral follicles, BMP15 stimulated  
proliferation of granulosa cells but inhibited their luteinization as evidenced by its  
suppression of FSH-stimulated progesterone secretion (Otsuka et al., 2000). In  
preovulatory follicles, BMP15 stimulated cumulus expansion and suppressed cumulus  
cell apoptosis (Hussein et al., 2005; Yoshino et al., 2006), and lack of *Bmp15* gene  
100 reduced oocyte maturation (Su et al., 2004). At gene expression level, BMP15  
suppressed FSH receptor expression as well as FSH-induced expression of LH receptor  
and steroidogenic enzymes (Otsuka et al., 2001) but induced expression epidermal  
growth factor (EGF) family members and EGF receptor in the cumulus cells (Su et al.,  
2010; Yoshino et al., 2006). Despite these studies, knockout of the *Bmp15* gene in mice  
105 surprisingly caused sub-fertility only with reduced ovulation and fertilization rate;

however, the ovarian morphology and structure were largely normal in terms of follicle development and corpus luteum formation (Yan et al., 2001). Interestingly, the loss of BMP15 in sheep causes sterility with small ovaries with follicles arrested at primary stage, similar to the *Gdf9* null mice (Braw-Tal et al., 1993; Davis et al., 1992; Galloway et al., 2000; Hanrahan et al., 2004; Smith et al., 1997). The function of *BMP15* in fertility has also been demonstrated in humans. Mutation of *BMP15* gene has been implicated in human primary ovarian insufficiency (POI) (Rossetti et al., 2009; Rossetti et al., 2020). The high species variation of BMP15 functions, especially between mono-ovulatory (e.g. sheep and humans) and poly-ovulatory (e.g., mice), raises interesting questions about its roles in other vertebrates.

In teleosts, BMP15 was first characterized in zebrafish (Clelland et al., 2006) and has since been described in a few fish species, including Japanese flounder (*Paralichthys olivaceus*) (Yu et al., 2020), catfish (*Clarias batrachus*) (Yadav and Lal, 2019), black porgy (*Acanthopagrus schlegelii*) (Wu et al., 2017), yellow-tail kingfish (*Seriola lalandi*) (Palomino et al., 2014), European sea bass (*Dicentrarchus labrax*) (Garcia-Lopez et al., 2011), and gibel carp (*Carassius auratus gibelio*) (Chen et al., 2012). Most of these studies have been limited to spatiotemporal expression patterns of *bmp15* without much exploration of the biological activities and functional importance of the molecule. Incubation of zebrafish full-grown (FG) follicles with antiserum against zebrafish Bmp15 stimulated oocyte maturation whereas treatment with recombinant human BMP15 suppressed human chorionic gonadotropin (hCG) and activin-stimulated oocyte maturation (Clelland et al., 2006; Clelland et al., 2007; Tan et al., 2009). Knockdown and overexpression of *bmp15* in early zebrafish follicles suggested that Bmp15 might function to prevent premature oocyte maturation (Clelland et al., 2007). Overexpression of *bmp15* in a flounder ovarian cell line suppressed expression of steroidogenic genes including aromatase (*cyp19a1a*), in contrast to *gdf9* (Yu et al., 2020). In agreement with this result, the expression of *bmp15* was negatively correlated with that of steroidogenic enzymes such as *cyp19a1a* and treatment of ovarian fragments with recombinant human BMP15 caused a decrease in the expression of *cyp19a1a* as well as 3 $\beta$ -HSD (*hsd3b*) and 17 $\beta$ -HSD (*hsd17b*) (Yadav and Lal, 2019). Disruption of *bmp15* gene in zebrafish resulted in follicle blockade at previtellogenic (PV) stage followed by sex reversal from females to males. In contrast to the suppression of *cyp19a1a* expression by Bmp15 in other fish species, no signal of *cyp19a1a* expression could be detected in the granulosa cells of the zebrafish *bmp15* mutant (Dranow et al., 2016). Despite these studies, the exact mechanisms of BMP15 actions remain largely unknown.

To explore the mechanisms underlying BMP15 actions in controlling folliculogenesis, we undertook this genetic study in zebrafish. Zebrafish is an excellent model for studying folliculogenesis because the females spawn on daily basis with follicles developing continuously in the ovary (Ge, 2018). We first created a *bmp15* mutant by CRISPR/Cas9. In contrast to the *gdf9* mutant (*gdf9*<sup>-/-</sup>) whose follicles were arrested at primary growth (PG) stage or PG-PV transition (Chen et al., 2022), the follicles in female *bmp15* mutant (*bmp15*<sup>-/-</sup>) were also completely arrested, but at later stage, *i.e.*, previtellogenic (PV) stage or PV-EV (early vitellogenic) transition, leading to female infertility. These results suggest that both *Gdf9* and *Bmp15* are critical in regulating early folliculogenesis; however, they act sequentially to control different stages. Our data also suggest that in addition to controlling the transition from PV to EV (initiation of vitellogenic growth), *Bmp15* also promotes follicle activation or puberty onset (PG-

155 PV transition). Using both genetic and pharmacological approaches as well as transcriptome analysis, we provided insightful evidence for interactions of Bmp15 and the activin-inhibin system in regulating folliculogenesis, which involves vitellogenin (Vtg/vtg) biosynthesis in the liver in response to estradiol (E2) produced by ovarian aromatase (*cyp19a1a*), and Vtg uptake by growing oocytes via endocytosis through potential Vtg receptors (e.g., *lrp2a*).

160

## Materials and Methods

### *Zebrafish maintenance*

165 The AB strain zebrafish (*Danio rerio*) was used to generate mutant lines in the present study. The fish were kept at  $28 \pm 1$  °C with a photoperiod of 14-h light and 10-h dark in the ZebTEC Multilinking Rack zebrafish system (Tecniplast, Buguggiate, Italy). The adult fish were fed twice daily with artemia and Otohime fish diet (Marubeni Nisshin Feed, Tokyo, Japan), which was delivered by the Tritone automatic feeding system (Tecniplast). The larval fish were fed with paramecia (5-10 dpf) and artemia (10-20 dpf) before transfer to the main system. All animal experiments were endorsed by the  
170 Research Ethics Committee of the University of Macau (AEC-13-002).

### *Generation of bmp15 null mutant line*

175 The CRISPR/Cas9 method was used to generate *bmp15* mutant line in zebrafish according to the protocols reported previously (Hwang et al., 2013; Jao et al., 2013; Zhang et al., 2015b). Briefly, a single-guide RNA (sgRNA) (Table S1) targeting the exon I of *bmp15* gene was designed by using the online tool (<http://zifit.partners.org/ZiFiT/Disclaimer.aspx>). The Cas9 mRNA and sgRNA were produced by *in vitro* transcription from pCS2-nCas9n (Addgene Plasmid #47929) and DraI-digested pDR274 (Addgene Plasmid #42250) using the mMACHINE T7 kit and mMACHINE SP6 kit according to the manufacturer's instruction (Invitrogen, Carlsbad,  
180 CA). Both Cas9 mRNA (300 ng/μL) and sgRNA (75 ng/μL) were co-microinjected (4.6 nL) into zebrafish embryos at one- or two-cell-stage using the Drummond Nanoject injector (Drummond Scientific, Broomall, PA).

### *Genotyping by high-resolution melting analysis (HRMA) and heteroduplex mobility assay (HMA)*

185 The genomic DNA was extracted by the NaOH method from a single embryo or piece of caudal fin as described previously (Meeker et al., 2007; Zhang et al., 2015b). Briefly, 40 μL NaOH with the concentration of 50 nmol/μL was added in the tube containing one embryo or a caudal fin piece and incubated at 95°C for 10 min. Then 4 μL Tris-HCl (pH 8.0) was added to neutralize the reaction. HRMA is a powerful tool to screen  
190 indel mutations or single nucleotide polymorphism in the samples and it was performed on the genomic DNA with specific primers listed in Table S1 using the CFX96 Real-Time PCR Detection System and the Precision Melt Analysis software (Bio-Rad Laboratories, Hercules, CA). HMA was performed with PAGE to verify the genotyping results of HRMA. Briefly, the HRMA product (5 μL) was subjected to electrophoresis  
195 in 20% polyacrylamide gels for 5 h at 100 V. Then the gel was stained with GelRed (Biotium, Hayward, CA) and visualized on the ChemiDoc imaging system (Bio-Rad).

Because HMA can detect small changes in sequence, this method is more sensitive than HRMA but with low throughput. The heterozygotes were detected as two bands and homozygotes showed only one band.

#### 200 *Sampling and histological examination*

The fish were sampled for phenotype analysis at different time points of development and the body weight (BW) and standard body length (BL) were recorded. Histological analysis was performed on paraffin sections using hematoxylin and eosin (H&E) staining. Briefly, the fish were anaesthetized with MS-222 (Sigma-Aldrich, Louis, MO) before measuring BL and BW by ruler and analytical balance respectively. Then the fish were photographed for gross morphology with a digital camera (EOS700D, Canon, Tokyo, Japan). The cloaca and pectoral fin were observed under the Nikon SMZ18 dissecting microscope and photographed with the Digit Sight DS-Fi2 digital camera (Nikon, Tokyo, Japan) for genital papilla (GP) in females and breeding tubercles (BT) in males respectively. After these examinations, the fish were fixed in Bouin's solution for at least 24 h. Dehydration and paraffin imbedding were then performed on the ASP6025S Automatic Vacuum Tissue Processor (Leica, Wetzlar, Germany). The samples were sectioned using the Leica microtome (Leica) at 5  $\mu\text{m}$  thickness. After deparaffinization, hydration and staining, the sections were examined on the Nikon ECLIPSE Ni-U microscope and micrographs were taken with the Digit Sight DS-Fi2 digital camera (Nikon).

#### *Follicle staging and quantification*

The follicles on sections were staged according to both size (diameter with visible germinal vesicle) and morphological features (cortical alveoli and yolk granules) as previously reported (Zhou et al., 2011) and they were divided into the following six stages: primary growth (PG, stage I;  $<150 \mu\text{m}$ ), previtellogenic (PV, stage II;  $\sim 250 \mu\text{m}$ ), early vitellogenic (EV, early stage III;  $\sim 350 \mu\text{m}$ ), mid-vitellogenic (MV, mid-stage III;  $\sim 450 \mu\text{m}$ ), late-vitellogenic (LV, late stage III;  $\sim 550 \mu\text{m}$ ) and full-grown (FG;  $>650 \mu\text{m}$ ). To quantify follicle composition in the ovary, we performed serial longitudinal sectioning of the whole fish at 5  $\mu\text{m}$  and measured the diameters of follicles on the three largest sections spaced at least 60  $\mu\text{m}$  apart using the NIS-Elements BR software (Nikon). To ensure accuracy of diameter measurement for follicle staging, we only measured the follicles with visible nuclei (germinal vesicles) on the section.

#### *Sex identification*

The sex of zebrafish was identified according to dimorphic morphological features including body shape, fin color, BT on the pectoral fin and GP at the cloaca. Normally, male fish showed a slim body shape with brownish color, clear BTs on the pectoral fin and an invisible GP, while female fish had a round body shape with silverish color, no BT, and a prominent GP. The area of BTs on the third pectoral fin ray was quantified by the ImageJ software. The sex of each fish was confirmed by histological sectioning and microscopic observation. The fish with well-formed ovaries were identified as females, while the fish with severely degenerating ovaries with or without testicular tissues were taken as intersexual type and the fish with well-formed testis were identified as males.

#### 240 *Fertility assessment*

The number of ovulated eggs and the percentage of survived embryos (fertilization rate) are two indicators used for assessment of fish fertility when they were mated with wild type (WT) partners through natural spawning. The fertility tests were performed at 5-day interval and each test involved five females of each genotype (+/+ or -/-) and five  
245 WT males in a breeding tank. The number of ovulated eggs was counted and averaged per female within three hours after spawning and the number of survived embryos was counted after 24 h. Individuals that failed to produce fertilized embryos after at least 10 trials were considered infertile.

#### *Measurement of serum E2 and Vtg levels*

250 To determine serum concentrations of E2 and Vtg, the blood was sampled from the heart directly with a glass capillary according to our reported protocol (Song et al., 2020; Wu et al., 2020). The blood samples were collected without treating the capillaries with heparin sodium, and they were kept for half an hour at room temperature to separate the serum. The supernatant (serum) was carefully transferred to a new microtube after  
255 centrifugation (5000 rpm, 20 min, 4°C). The levels of E2 and Vtg in the serum from each fish were measured using the ELISA kits for E2 (Neogen, Lansing, Michigan) and zebrafish Vtg (Cayman Chemical, Ann Arbor, MI), respectively, according to the manufacturer's instructions.

#### *E2 and fadrozole treatment*

260 17 $\beta$ -estradiol (E2, CAS: 50-28-2,  $\geq$  99%) and fadrozole (CAS: 102676-31-3,  $\geq$  98%), a nonsteroidal aromatase inhibitor, were purchased from Sigma-Aldrich (St. Louis, Missouri). The *bmp15*-null female fish were treated with E2 for 20 days (from 80 to 100 dpf) continuously. We used two treatment methods: water-borne exposure and oral administration by feeding. For water-borne exposure, the *bmp15* mutant fish were  
265 placed in a clean tank with 10 L water. E2 stock solution or the vehicle ethanol was added to the water to the final concentrations of 0 and 10 nM. The water was renewed daily during the exposure period to maintain relatively constant concentrations. For oral administration, the Otohime fish feed was mixed with E2 stock solution and dried overnight in an oven at 60°C. The fish were fed twice a day with the dried feed  
270 containing E2 at different concentrations (0, 2, 20 and 200  $\mu$ g/g) and supplemented with artemia. The total amount of feed administered was 10% (W/W) of fish body weight per day (5% per meal). For the double mutant females (*bmp15*<sup>-/-</sup>;*inha*<sup>-/-</sup>), they were treated similarly from 80 to 100 dpf with dried powder feed containing fadrozole (0 and 200  $\mu$ g/g).

#### 275 *Transcriptome analysis*

To investigate the mechanisms of Bmp15 actions, we collected PG follicles from 12 samples at 4 months post-fertilization (mpf) as follows: three control fish (*bmp15*<sup>+/+</sup>;*inha*<sup>+/+</sup>), three *bmp15* mutant fish (*bmp15*<sup>-/-</sup>), three *inha* mutant fish (*inha*<sup>-/-</sup>) and three double mutant fish (*bmp15*<sup>-/-</sup>;*inha*<sup>-/-</sup>). All fish were genotyped by  
280 HRMA, and their ovaries were isolated and placed in a microtube containing 1 mL L15 medium (Sigma-Aldrich). We immediately dispersed the ovaries and isolated PG stage follicles for transcriptome (RNA-seq) analysis. The RNA extraction, cDNA library construction, quality control, RNA sequencing and preliminary analysis of transcriptome data were carried out using Novaseq 6000 sequencing system (Novogene  
285 Bioinformatics Technology, Tianjin, China). Genes with an adjusted P-value  $\leq$  0.05

were defined as differentially expressed genes (DEGs) with statistical significance. DEGs were then subject to Gene Ontology (GO) enrichment analysis and Kyoto Encyclopedia of Genes and Genomes (KEGG) pathway enrichment analysis using Cluster Profiler R package. The RNA-seq data are available at NCBI under the  
290 BioProject No. PRJNA849009.

#### *RNA extraction and quantitative real-time qPCR*

Total RNA was isolated from various tissues using TRIzol (Invitrogen), and quantified using NanoDrop 2000 (Thermo Scientific, Waltham, MA) based on the absorbance at 260 nm. Reverse transcription reaction was performed on the same amount of total  
295 RNA using M-MLV reverse transcriptase (Invitrogen). Real-time qPCR was performed on the CFX96 Real-Time PCR Detection System using the SsoFast EvaGreen Supermix (Bio-Rad). Each sample was assayed in duplicate for accuracy, and the primers used were listed in Table S1. The expression of target genes in each sample was normalized to that of the housekeeping gene *efla*, and expressed as the ratio to the  
300 control group.

#### *Double-colored fluorescent in situ hybridization (FISH)*

To detect the expression of gonadotropins (FSH and LH) in the mutant, we performed double-colored fluorescent FISH analysis. The cDNAs of *fshb* and *lhb* were amplified by specific primers as described before (Chen and Ge, 2012). The sense and anti-sense  
305 probes were prepared from pBluescript II KS containing cDNAs of *fshb* and *lhb*. Both probes were labeled with fluorescein or digoxigenin (DIG) using RNA labeling kit (Roche Applied Science, Mannheim, Germany). The heads of fish at 4 mpf were fixed in 4% paraformaldehyde (PFA) for at least 48 h, embedded in paraffin and sectioned at 5  $\mu$ m thickness. The sections were deparaffinized and rehydrated before digestion with proteinase K (4  $\mu$ g/ml; Roche) for 15 min at 37°C. The sections were then hybridized with fluorescein and DIG-labeled RNA probes overnight at 60°C. On the following day, the sections were first washed with 5 $\times$  saline-sodium citrate for 5 min, 2 $\times$  SSC for 20 min, and 0.2 $\times$  SSC for 20 min (SSC; 0.15 M NaCl and 0.015 M sodium citrate). The hybridization signal was detected by horseradish peroxidase (HRP)-conjugated anti-fluorescein antibody (Roche) with TSA-fluorescein. The sections were incubated in 1% H<sub>2</sub>O<sub>2</sub> for 60 min to deactivate the HRP from the first staining before detecting the second signal. Then the HRP-conjugated anti-DIG antibody (Roche) was added and the signal was detected by TSA-cy5/TMR system. Prolong Gold antifade reagent (Invitrogen) was used for mounting the sections, which were viewed on the Olympus  
315 FluoView1000 confocal microscope (Olympus, Tokyo, Japan) for image analysis.  
320

#### *Statistical analysis*

All values in this study were obtained from multiple independent experiments and/or biological repeats ( $n \geq 3$ ). The data are presented as mean  $\pm$  standard error of the mean (SEM), and the significance (\* $P < 0.05$ ; \*\* $P < 0.01$ ; \*\*\* $P < 0.001$ ; n.s., not significant)  
325 was analyzed by Student's t-test or ANOVA followed by Tukey's multiple comparison. Chi-squared ( $X^2$ ) test was used for sex ratio analysis. All analyses were performed with Prism 8 (GraphPad Prism, San Diego, CA).



## Results

### 330 *Spatiotemporal expression of bmp15 and related genes in folliculogenesis*

BMP15 was first discovered in mice and humans as an oocyte-specific growth factor (Dube et al., 1998). However, a previous study using in situ hybridization showed that *bmp15* was expressed in both the oocyte and follicle cells in zebrafish (Clelland et al., 2006). We clarified this issue by mechanically separating oocyte and somatic  
335 follicle layer at FG stage followed by RT-PCR detection of *bmp15* expression in the two compartments. The well-known oocyte-specific *gdf9* and LH receptor (*lhcg*) were used as the markers for denuded oocyte and follicle layer respectively. Both *gdf9* and *bmp15* were detected exclusively in the denuded oocytes. In contrast, *lhcg* together with inhibin  $\alpha$  (*inha*), inhibin/activin  $\beta$ Aa (*inhbaa*), and BMP type II receptors (*bmpr2a* and *bmpr2b*) was expressed exclusively in the follicle layers, in agreement with our  
340 previous studies (Li and Ge, 2011; Poon et al., 2009; Tse and Ge, 2010). Such expression patterns strongly suggested a potential Bmp15-mediated paracrine pathway in the follicle that mediates an oocyte-to-follicle cell communication. We also examined the distribution of a few vitellogenin receptor-like proteins in the follicle,  
345 including *lrp1ab*, *lrp2a*, *lrp5* and *lrp6*, which were identified by transcriptome analysis (see below for details). Interestingly, *lrp1ab*, *lrp5* and *lrp6* were all expressed in both follicle cells and oocytes whereas *lrp2a* was exclusively expressed in the follicle cells (Fig. 1A).

We also analyzed the temporal expression profiles of some of the above genes  
350 during follicle growth. Most of the genes studied showed the lowest expression at PG stage except *gdf9* and *bmp15*, which showed the highest expression at PG and PV stage respectively, followed by progressive decline towards FG stage (Fig. 1B). The expression patterns of *fshr*, *lhcg*, and *inha* all agreed well with our previous studies (Poon et al., 2009; Zhou et al., 2011). The expression patterns of *lrp1ab*, *lrp2a*, *lrp5*  
355 and *lrp6* seemed to correlate closely with the phase of vitellogenic growth, in particular *lrp2a*. The expression of *lrp2a* was nearly undetectable at previtellogenic PG and PV stages and post-vitellogenic LV and FG stages; however, it surged dramatically at EV and MV, which represent the stages of the fastest vitellogenic growth (Fig. 1B).

### *Establishment of bmp15 knockout zebrafish line*

To create *bmp15* null mutants, we designed a sgRNA that targets the exon 1  
360 downstream of the translation start codon (Fig. S1A). A mutant line with 5-bp indel deletion was established that introduced an early terminator, resulting in synthesis of a truncated protein (Fig. S1B) (ZFIN line number: umo35). The loss of *bmp15* was also confirmed at mRNA level by RT-PCR on the ovary using a specific primer with 5'-end  
365 overlapping with the mutation site, which would generate positive product in WT (*bmp15*<sup>+/+</sup>) and heterozygotes (*bmp15*<sup>+/-</sup>), but not in the homozygous mutant (*bmp15*<sup>-/-</sup>) (Fig. S1C). HRMA and HMA were performed to identify the genotypes. Since the mutation is only 5-bp deletion, it is difficult to distinguish the homozygous mutant (*bmp15*<sup>-/-</sup>) from WT (*bmp15*<sup>+/+</sup>). To solve this problem, we spiked the  
370 unknown samples with WT DNA to form heteroduplexes, which would generate a melt curve similar to that of the heterozygote (Fig. S1D). We performed HMA to confirm the accuracy of HRMA. The heterozygotes showed two slow-migrating bands and the homozygous mutant showed a lower band than the WT (Fig. S1E).

### *Delayed follicle activation and puberty onset in bmp15-deficient females*

375 To investigate the function of *bmp15* in early follicle development, we performed  
histological analysis of the juvenile zebrafish females from 40 to 60 dpf to study  
whether the lack of *bmp15* would affect puberty onset, which is marked by the  
appearance of the first cohort of PV follicles characterized with the formation of cortical  
alveoli (Chen and Ge, 2013) (Fig. 2A). According to our recent studies, the PG follicles  
380 from 25 to 35 dpf and stay at the same stage until about 45 dpf when some follicles start  
to enter the PV stage (Qin et al., 2022; Qin et al., 2018). Upon entering the PV stage,  
the cortical alveoli form first as a single layer of small vesicles (PV-I), then larger ones  
(PV-II) and finally multiple layers (PV-III) (Fig. 2B). As we reported previously, the  
initiation of PG-PV transition or puberty onset in female zebrafish depends on body  
385 growth with BL of 1.8 cm and BW of 100 mg being the thresholds (Chen and Ge, 2013;  
Hu et al., 2022). This provides a valuable tool for assessing the regulation of puberty  
onset (Chakradhar, 2018).

As shown in Fig. 2A, the PV follicles started to appear in control females (*bmp15*<sup>+/-</sup>)  
at 45 dpf when BW and/or BL reached or crossed 100 mg and/or 1.80 cm respectively,  
390 but not when they were both below the thresholds. In contrast, many mutant fish  
(*bmp15*<sup>-/-</sup>) could not undergo the PG-PV transition even when their BL and BW had  
crossed the thresholds (1.80 cm/100 mg). Early PV follicles (PV-I) started to appear in  
the mutant ovary at 55 dpf when the BL was around 2.2 cm and BW was nearly 130  
mg (Fig. 2A, C and D). Statistical analysis at 45 dpf showed that all the fish in the  
control group (*bmp15*<sup>+/-</sup>) had completed puberty onset after reaching the thresholds of  
395 BW and BL; however, about 40% mutants (*bmp15*<sup>-/-</sup>) were still at pre-pubertal stage  
without PV follicles (Fig. 2E). The delayed PG-PV transition continued to be seen at  
50 dpf (~29%, 2/7) (Fig. 2F). In addition, the mutant fish that initiated puberty onset  
had early PV follicles (PV-I or PV-II) only, while nearly all the control fish had reached  
400 late PV (PV-III) stage. As a result, the mutant ovaries contained more PG and less PV  
follicles (Fig. 2G). This result clearly demonstrated that puberty onset or follicle  
activation was delayed in *bmp15*-deficient females.

### *Post-pubertal arrest of follicle development in bmp15-deficient females*

To investigate the function of *bmp15* in post-pubertal folliculogenesis, we performed  
405 histological examination of *bmp15* mutants at sexual maturation stage (120 dpf). The  
control fish (*bmp15*<sup>+/+</sup> and *bmp15*<sup>+/-</sup>) showed no difference in folliculogenesis with  
full range of follicles from PG to FG. In contrast, the follicles in the mutant (*bmp15*<sup>-/-</sup>)  
were completely blocked at the PV stage with normal formation of cortical alveoli but  
without accumulation of yolk granules in the oocytes (Fig. 3A). Measurement of follicle  
410 diameters showed that none of the follicles in the mutant could grow beyond PV stage  
(Fig. 3B). We further quantified follicle composition in the control (*bmp15*<sup>+/-</sup>) and  
mutant fish based on follicle size and structural features (cortical alveoli and yolk  
granules). In control fish, 30.1% of the follicles were at vitellogenic stage from EV to  
FG (stage III), 22.5% at PV stage (stage II), and 47.3% at PG stage (stage I). In contrast,  
415 the mutant ovaries comprised 74.3% PG and 25.7% PV follicles, but no vitellogenic  
ones (Fig. 3C).

### *Sex reversal of bmp15-deficient females to males*

To evaluate long-term effects of *bmp15* deficiency, we examined the mutant from 50 to 300 dpf. During this period, the testis and spermatogenesis were normal in mutant males. As for females, the mutant ovaries were largely normal at 80 dpf except that the follicles were arrested at PV stage with large interfollicular spaces. In addition to ovaries (8/21) and testes (10/21), we also observed ovotestis in some mutant fish (3/21), indicating sex reversal from females to males. At 210 dpf, most mutant fish were males (11/19) with more fish at transitional state with ovotestis (6/19). The remaining mutant females (2/19) showed severe ovarian degeneration and follicle atresia (Fig. 4A).

We also characterized the secondary sexual characteristics (SSCs) of zebrafish during the process of sex reversal and correlated them with gonadal conditions. In addition to the enlarged abdomen and silverish body color, the female zebrafish also possess a protruding cloaca or genital papilla (GP). The male zebrafish appear brownish in color with a slim body shape, and they possess unique breeding tubercles (BT) on the pectoral fins (Dai et al., 2021). For the convenience of study, we divided the process of sex reversal into four stages (I-IV) based on changes of both gonads and SSCs. The fish at stage I has normal ovary as seen in control females with GP only. Stage II marks the start of sex reversal with the ovary containing follicles only without testicular tissues; however, while maintaining GP, the fish start to develop small BTs on the pectoral fins, an indication of masculinization. Stage II is therefore the period when both feminine GP and masculine BTs coexist in the same fish. As sex reversal progresses, the GP gradually regresses. The fish at stage III has lost GP while its BTs become more prominent. The ovary of stage III fish still contains follicles; however, the testicular tissues have appeared and become progressively dominant. Stage IV marks the end of sex reversal with a complete replacement of the ovary by testis as seen in control males. All these four stages could be seen in the mutants (*bmp15*<sup>-/-</sup>) at 120 dpf (Fig. 4B). The development of BTs on the pectoral fins seemed to be a sensitive marker for sex reversal, and its development precedes the appearance of visible testicular tissues in the ovary. Quantification of the BT area showed a clear correlation with the development of testicular tissues at different stages of sex reversal (Fig. 4C). We also analyzed gonadosomatic index (GSI, gonad weight/body weight) of female, male and intersexual mutants at 120 dpf. The GSI of control females was significantly higher than that of males (*bmp15*<sup>+/-</sup>). However, the female mutants (*bmp15*<sup>-/-</sup>) at stage I showed significantly lower GSI than the control females, and the GSI of the intersexual mutants at stage II and III was even lower, close to that of males of both control and mutant (stage IV) (Fig. 4D). Analysis of sex ratios from 50 to 300 dpf showed that the sex reversal process occurred asynchronously starting from about 80 dpf in female mutant (*bmp15*<sup>-/-</sup>) and lasted beyond 300 dpf (Fig. 4E).

#### 455 *Rescue of bmp15 deficiency by inha mutation*

BMP15 and GDF9 are close members of the TGF- $\beta$  superfamily, and they are both specifically expressed in the oocytes. Our recent study showed that the loss of *gdf9* in zebrafish resulted in a complete arrest of follicles at PG stage without accumulation of cortical alveoli. Interestingly, this phenotype could be rescued by simultaneous mutation of inhibin  $\alpha$  subunit (*inha*<sup>-/-</sup>) (Chen et al., 2022). This raised an interesting question about the relationship between Bmp15 and inhibin. To address this issue, we created a double mutant *bmp15*<sup>-/-</sup>;*inha*<sup>-/-</sup> and examined its folliculogenesis. Interestingly, simultaneous mutation of *inha* also restored vitellogenic growth in *bmp15* mutant. In contrast to *bmp15*<sup>-/-</sup> single mutant whose follicles were arrested at PV stage

465 with formation of cortical alveoli but not yolk granules in the oocytes, the double  
mutant *bmp15*<sup>-/-</sup>;*inha*<sup>-/-</sup> showed normal vitellogenic growth beyond PV stage with  
large amount of yolk accumulated in the oocytes (Fig. 5A). However, quantitative  
analysis of follicle composition based on diameter showed that the rescued follicles  
470 could only grow to the MV stage, not LV and FG stage, suggesting a blockade at MV-  
LV transition (Fig. 5B). Since yolk granules are derived from Vtg, which is produced  
in the liver in response to estrogens, we determined the levels of E2 and Vtg in the  
serum. The levels of E2 and Vtg decreased significantly in *bmp15*<sup>-/-</sup> single mutant;  
however, they were both restored to normal levels in the double mutant (*bmp15*<sup>-/-</sup>;*inha*  
475 <sup>-/-</sup>) (Fig. 5C and D).

#### 475 *Transcriptome analysis of bmp15*<sup>-/-</sup>, *inha*<sup>-/-</sup> and *bmp15*<sup>-/-</sup>;*inha*<sup>-/-</sup> mutant follicles

To understand how mutation of *inha* could rescue the phenotypes of *bmp15* mutant, we  
performed a transcriptome analysis on PG follicles from WT, single mutants (*bmp15*<sup>-/-</sup>  
480 <sup>-/-</sup> and *inha*<sup>-/-</sup>) and double mutant (*bmp15*<sup>-/-</sup>;*inha*<sup>-/-</sup>). We chose PG follicles for the  
analysis because the *bmp15* mutant displayed a delayed follicle activation or PG-PV  
transition. The RNA-seq data revealed a total of 734 up-regulated and 1789 down-  
regulated genes in *bmp15*<sup>-/-</sup> mutant follicles compared with WT. In contrast, a total of  
5572 genes were up-regulated and 3451 down-regulated in *inha*<sup>-/-</sup> mutant follicles. In  
the double mutant, 4852 genes were up-regulated and 3855 down-regulated, similar to  
that of *inha*<sup>-/-</sup> but distinct from that of *bmp15*<sup>-/-</sup>. The heatmap of DEGs shows clear  
485 and distinct patterns of the three genotypes (*bmp15*<sup>-/-</sup>, *inha*<sup>-/-</sup> and *bmp15*<sup>-/-</sup>;*inha*<sup>-/-</sup>)  
and the similarity between *inha*<sup>-/-</sup> and *bmp15*<sup>-/-</sup>;*inha*<sup>-/-</sup> Fig. 6A. Most of the DEGs in  
*bmp15*<sup>-/-</sup> follicles were down-regulated as compared to WT whereas most DEGs in  
*inha*<sup>-/-</sup> were up-regulated (Fig. 6A and B). Interestingly, mutation of *inha*<sup>-/-</sup> in the  
double mutant reversed the expression pattern from *bmp15*<sup>-/-</sup> to *inha*<sup>-/-</sup>. Example genes  
490 include *ecm1a*, *rps4x*, *marco*, *nr1d2a* and *lrp2a*, which were down-regulated in *bmp15*<sup>-/-</sup>  
follicles but up-regulated in *inha*<sup>-/-</sup> and *bmp15*<sup>-/-</sup>;*inha*<sup>-/-</sup> follicles (Fig. 6B). Such  
expression patterns suggested that during folliculogenesis, Bmp15 may act as a  
facilitator, while inhibin acts as a depressant.

The DEGs with statistical significance were subjected to further GO enrichment and  
495 KEGG pathway analyses. Many GO terms associated with fundamental biological  
processes were enriched for up- and down-regulated genes in *bmp15*<sup>-/-</sup> mutants,  
including translation and cell respiration. In *inha*<sup>-/-</sup> and double mutants (*bmp15*<sup>-/-</sup>;  
*inha*<sup>-/-</sup>), the GO terms enriched for up- and down-regulated genes included RNA  
processing, immune response, defense response and cell migration and GTPase activity  
500 (Fig. S2). Interestingly, some genes that were enhanced in *inha*<sup>-/-</sup> and double mutant  
compared to *bmp15*<sup>-/-</sup> belonged to the pathways of TGF- $\beta$  signaling, endocytosis, and  
receptor-mediated endocytosis. In the TGF- $\beta$  signaling pathway, activin subunit  $\beta$ Aa  
(*inhbaa*) and TGF- $\beta$ 1a (*tgfb1a*) showed significant increase in both *inha*<sup>-/-</sup> and double  
mutants (*bmp15*<sup>-/-</sup>;*inha*<sup>-/-</sup>). In addition, several type I receptors of the TGF- $\beta$   
505 superfamily (*tgfbr1b*, *bmpr1bb*, and *acvsr1l*) also increased expression in *inha*<sup>-/-</sup> and  
*bmp15*<sup>-/-</sup>;*inha*<sup>-/-</sup>. The pathways of endocytosis and receptor-mediated endocytosis  
enriched for up-regulated genes in *bmp15*<sup>-/-</sup>;*inha*<sup>-/-</sup> were particularly interesting as  
these genes might play roles in Vtg uptake, which involves receptor-mediated  
endocytosis. The increased expression and activity of these pathways in the double  
510 mutant would suggest an enhanced Vtg uptake, resulting in yolk granule accumulation  
(Fig. 6C).

In zebrafish folliculogenesis, the PG-PV transition represents a critical stage of follicle development, which involves significant changes in gene expression (Wong et al., 2018; Zhu et al., 2018). Although our transcriptome data revealed dramatic changes in expression of thousands of genes in *bmp15*<sup>-/-</sup> and *bmp15*<sup>-/-</sup>;*inha*<sup>-/-</sup> at PG stage, it may not represent the changes at PV stage where the follicles of *bmp15*<sup>-/-</sup> were blocked. To demonstrate this, we performed real-time PCR at both PG and PV stages on some selected genes that are believed to play key roles in follicle development, including aromatase (*cyp19a1a*), gonadotropin receptors (*fshr* and *lhcg*), and the activin-inhibin-follistatin system (*inhbaa*, *inhbab*, *inhbb*, *inha*, *fsta* and *fstb*). To ensure comparability, we isolated PG and PV follicles from the fish at 60 dpf when the WT and mutant fish had developed to the same stage (PV) (Fig. 7A). Notably, the expression of *cyp19a1a* and *inhbaa* was very low at PG stage but increased sharply during the PG-PV transition in the control fish. The loss of *bmp15* did not significantly affect *cyp19a1a* and *inhbaa* expression in PG follicles, but dramatically reduced their expression in PV follicles. In contrast, none of the other genes examined showed significant response to *bmp15* mutation at either PG or PV stage (Fig. 7B). To confirm this, we measured serum levels of E2 and Vtg by ELISA. As expected, both E2 and Vtg decreased significantly in *bmp15*<sup>-/-</sup> mutant females (Fig. 7C). Since *cyp19a1a* is responsible for the production of E2, which is essential for hepatic production of Vtg, the reduced expression of *cyp19a1a* and production of Vtg could be one of major factors that prevented PV follicles from entering vitellogenic growth (EV-FG).

#### *Resumption of vitellogenic growth in bmp15 mutant females by estrogens*

To investigate if the blockade of folliculogenesis at PV stage in *bmp15* mutant females (*bmp15*<sup>-/-</sup>) was due to reduced production of estrogens as shown above. We performed an in vivo experiment to test if exposure to E2 could rescue the follicle blockade in *bmp15*<sup>-/-</sup> females. Two methods were used for the treatment: water-borne exposure and oral administration by feeding. The fish were treated for 20 days from 80 to 100 dpf. For water-borne exposure, E2 was first dissolved in ethanol and added to the tank to the final concentration of 10 nM. For oral administration, the fish were fed with E2-containing diet twice a day at 5% (W/W) of total fish body weight each time. Both feeding at 200 µg/g and water-borne exposure at 10 nM suppressed ovarian development, in agreement with our previous report (Chen et al., 2017a). However, E2 at lower doses of 2 and 20 µg/g were effective in promoting ovarian growth in *bmp15*<sup>-/-</sup> females. The dose of 2 µg/g showed the strongest and most consistent effect as all five fish treated overcame the blockade at the PV stage and resumed vitellogenic growth (5/5) compared to the group of 20 µg/g (3/5) (Fig. 8A). However, measurement of follicle sizes showed that although E2 treatment could resume vitellogenic growth with yolk accumulation in the mutant, the follicle could only grow to the EV stage (Fig. 8B), suggesting that estrogens were likely one of the factors involved in the rescue of *bmp15*<sup>-/-</sup> phenotypes by *inha*<sup>-/-</sup>, but not the only factor.

#### *Involvement of cyp19a1a in the rescue of bmp15 deficiency by inha mutation*

As described above, both *inha* mutation (*inha*<sup>-/-</sup>) and E2 treatment could rescue the phenotypes of *bmp15*<sup>-/-</sup>, i.e., resumption of follicle development beyond PV stage with accumulation of yolk granules. Since the expression of *cyp19a1a* decreased significantly in *bmp15*<sup>-/-</sup> follicles (Fig. 7B) but increased dramatically in *inha*<sup>-/-</sup> (Lu et al., 2020), it is conceivable that the rescue of *bmp15*<sup>-/-</sup> phenotype by *inha*<sup>-/-</sup> might involve *cyp19a1a* and E2; in other words, Bmp15 may act in zebrafish follicles by

560 increasing *cyp19a1a* expression and therefore E2 production. To test this hypothesis, we treated the double mutant fish *bmp15<sup>-/-</sup>;inha<sup>-/-</sup>* with fadrozole, an aromatase (*cyp19a1a*) inhibitor, by oral administration from 80 to 100 dpf. The result showed that the resumption of vitellogenic growth in the double mutant (*bmp15<sup>-/-</sup>;inha<sup>-/-</sup>*) was completely abolished by treatment with fadrozole (200 µg/g) (Fig. 9A). Gene expression analysis and determination of serum E2 and Vtg levels further confirmed the effectiveness of fadrozole. The expression of *cyp19a1a* was low in the PG follicles of both control *bmp15<sup>+/-</sup>* and mutant *bmp15<sup>-/-</sup>* fish; however, it increased significantly in E2-treated *bmp15<sup>-/-</sup>* fish as well as in the double mutant (*bmp15<sup>-/-</sup>;inha<sup>-/-</sup>*). Fadrozole treatment abolished the increase in the double mutant. Similar response was also observed for Vtg genes *vtg1* and *vtg3* in the liver (Fig.9B). In agreement with the changes in gene expression, the serum E2 and Vtg levels were both low in *bmp15<sup>-/-</sup>* fish, and E2 treatment and *inha* mutation (*bmp15<sup>-/-</sup>;inha<sup>-/-</sup>*) both increased their concentrations to the control levels. Such increase in the double mutant was again abolished by fadrozole treatment (Fig. 9C).

#### *Involvement of inhbaa in the rescue of bmp15 deficiency by inha mutation*

575 In addition to *cyp19a1a*, our transcriptome analysis also demonstrated up-regulation of TGF-β signaling pathway in *inha* single mutant (*inha<sup>-/-</sup>*) and double mutant with *bmp15* (*bmp15<sup>-/-</sup>;inha<sup>-/-</sup>*), including two ligands (*tgfb1a* and *inhbaa*) and several receptors (*tgfbr1b*, *bmpr1bb*, and *acvr11*) (Fig. 6C). As inhibin (αβ) is the antagonist of activin (ββ), the loss of *inha* (α) and increased expression of βAa (*inhbaa*) would suggest an increase in activin formation and its activity. We therefore postulated that activins especially *inhbaa* may also play a role in the phenotypical rescue of *bmp15<sup>-/-</sup>* by *inha* deficiency among other TGF-β family members and in addition to *cyp19a1a*. To test this hypothesis, we created a triple mutant (*bmp15<sup>-/-</sup>;inha<sup>-/-</sup>;inhbaa<sup>-/-</sup>*) using an *inhbaa* mutant line established in our laboratory (ZFIN line number: umo27) (Zhao et al., 2022). Phenotype analysis at 120 dpf showed that the lack of *inhbaa* in the triple mutant (*bmp15<sup>-/-</sup>;inha<sup>-/-</sup>;inhbaa<sup>-/-</sup>*) prevented most of the phenotypes rescued by *inha<sup>-/-</sup>* in the double mutant (*bmp15<sup>-/-</sup>;inha<sup>-/-</sup>*). First, although the follicles in the triple mutant continued to grow beyond the size range of PV stage, they could not enter the vitellogenic growth as there was no accumulation of yolk granules in the oocytes as seen in the double mutant (Fig. 10A and B). As the result, the triple mutant ovary looked lighter in color with follicles barely visible with naked eyes, similar to that of *bmp15<sup>-/-</sup>* but not the control and double mutant (*bmp15<sup>-/-</sup>;inha<sup>-/-</sup>*) (Fig. 10A). Second, *inhbaa* deficiency also retarded follicle growth in the triple mutant compared to that in the double mutant. The follicles in the triple mutant could grow close to the size of EV stage (< 350 µm), but not MV stage (~450 µm) achieved in the double mutant (Fig. 10C). As the result, the GSI in the triple mutant was similar to that in *bmp15<sup>-/-</sup>* single mutant but significantly lower than that in the double mutant (Fig. 10D). Third, both E2 and Vtg levels in the serum decreased significantly in the triple mutant compared to those in the double mutant (Fig. 10E and F). Due to the deficiency in follicle growth, all single (*bmp15<sup>-/-</sup>*; PV), double (*bmp15<sup>-/-</sup>;inha<sup>-/-</sup>*; MV) and triple mutant (*bmp15<sup>-/-</sup>;inha<sup>-/-</sup>;inhbaa<sup>-/-</sup>*; EV) females were infertile as their follicles could not grow to the FG stage (Fig. 10G). Interestingly, being arrested at PV stage, the *bmp15<sup>-/-</sup>* females eventually underwent sex reversal at different time points of development. However, the femaleness was maintained, and sex change did not occur in both double and triple mutants (Fig. 10H).

### Potential interactions of *Bmp15*, activin and inhibin

Our transcriptome analysis revealed significant up-regulation of TGF- $\beta$  signaling pathway including both ligands and receptors. Interestingly, the phenotypes of *bmp15*<sup>-/-</sup> could be partially rescued by the loss of inhibin (*inha*<sup>-/-</sup>) in the double mutant (*bmp15*<sup>-/-</sup>;*inha*<sup>-/-</sup>). Furthermore, the phenotypical rescue of *bmp15*<sup>-/-</sup> by *inha*<sup>-/-</sup> could be partially prevented by the loss of activin  $\beta$ Aa subunit (*inhbaa*<sup>-/-</sup>) in the triple mutant (*bmp15*<sup>-/-</sup>;*inha*<sup>-/-</sup>;*inhbaa*). To explore the mechanisms of how *bmp15*, *inha* (inhibin) and *inhbaa* (activin) might work together to regulate early follicle development, we performed RT-PCR analysis at 120 dpf on expression levels of some well-known factors that are likely involved in the event, *i.e.*, the transition from previtellogenic to vitellogenic growth (PV-EV transition), including gonadotropins in the pituitary (*fshb* and *lhb*) and their receptors in the ovary (*fshr* and *lhgr*), aromatase (*cyp19a1a*) in the ovary and estrogen receptors in the liver (*esr1*, *esr2a* and *esr2b*), Vtg genes in the liver (*vtg1*, *vtg2*, *vtg3*, *vtg4*, *vtg5*, *vtg6* and *vtg7*), and Vtg receptor-like proteins in the ovary (*lrp1ab* and *lrp2a*). For the genes in the ovary, we used PG follicles to ensure comparability as these follicles could be isolated more uniformly to minimize the interference by advanced stages of follicles in different genotypes. The results showed that most of the genes examined were significantly up-regulated in the ovary of *inha*<sup>-/-</sup> mutant and remained higher in the double mutant (*bmp15*<sup>-/-</sup>;*inha*<sup>-/-</sup>) than the control fish.

In the ovary, *cyp19a1a* showed the most dramatic change in expression in response to *bmp15*, *inha* and *inhbaa* mutations. Its expression surged in *inha*<sup>-/-</sup> mutant and remained high in the double mutant (*bmp15*<sup>-/-</sup>;*inha*<sup>-/-</sup>); however, such increased expression was abolished in the triple mutant with *inhbaa* deficiency (*bmp15*<sup>-/-</sup>;*inha*<sup>-/-</sup>;*inhbaa*<sup>-/-</sup>). Similar pattern was also observed for *inhbaa*, *lrp1ab* and *lrp2a* (Fig. 11A).

In the liver, the Vtg genes (*vtg1*, *vtg2*, *vtg3*, *vtg4*, *vtg5*, *vtg6* and *vtg7*) all decreased in expression in *bmp15*<sup>-/-</sup> mutant but significantly increased in *inha*<sup>-/-</sup> mutant despite that not all changes showed statistical significance. Although the expression of these Vtg genes decreased in the double mutant (*bmp15*<sup>-/-</sup>;*inha*<sup>-/-</sup>) compared to *inha*<sup>-/-</sup>, most of them showed higher expression than *bmp15*<sup>-/-</sup> mutant (*vtg1/3/5/6*). Such difference was diminished again in the triple mutant without *inhbaa* (Fig. 11B). Since Vtg production in the liver is tightly controlled by estrogens from the ovary, we also examined expression patterns of estrogen receptors in the liver in various mutants. Among the three nuclear estrogen receptors (*esr1*, *esr2a* and *esr2b*), *esr1* displayed the most significant change in expression, similar to the *vtg* genes. Its expression decreased in the liver of *bmp15*<sup>-/-</sup> mutant despite lack of significance but increased dramatically in *inha*<sup>-/-</sup> mutant. The expression level decreased in the double mutant (*bmp15*<sup>-/-</sup>;*inha*<sup>-/-</sup>) but remained higher than that in the *bmp15*<sup>-/-</sup>. Such difference was again abolished by *inhbaa* deficiency in the triple mutant (Fig. 11C).

At the pituitary level, *lhb* showed no response to mutations of the *bmp15*, *inha* and *inhbaa*. In contrast, the expression of *fshb* increased progressively from single mutants (*bmp15*<sup>-/-</sup> and *inha*<sup>-/-</sup>) to double (*bmp15*<sup>-/-</sup>;*inha*<sup>-/-</sup>) and triple (*bmp15*<sup>-/-</sup>;*inha*<sup>-/-</sup>;*inhbaa*<sup>-/-</sup>) mutants. Interestingly, instead of reducing or abolishing the increased expression in *inha* single (*inha*<sup>-/-</sup>) or double mutant (*bmp15*<sup>-/-</sup>;*inha*<sup>-/-</sup>) as seen for other genes examined in the ovary and liver, the loss of *inhbaa* in the triple mutant further increased the expression of *fshb* in the pituitary (Fig. 11D). This was also confirmed by

in situ hybridization for *fshb* and *lhb*. The pituitary of the triple mutant showed strongest signal for *fshb* in the triple mutant (Fig. 11E).

### *Interaction of Bmp15, Gdf9 and Inhibin in controlling folliculogenesis*

655 Bmp15 and Gdf9 are both oocyte-specific factors and they are closely related in  
structure and function. Interestingly, the loss of *bmp15* and *gdf9* resulted in follicle  
blockade at different developmental stages. The mutation of *gdf9* caused a complete  
arrest of follicle development at PG stage without formation of cortical alveoli (PG-PV  
660 (PV-EV transition) (Chen et al., 2022) whereas *bmp15* deficiency arrested follicles at PV stage  
(PV-EV transition) without any signs of vitellogenesis characterized by yolk granule  
accumulation. To study potential interactions between *bmp15* and *gdf9*, we generated a  
double mutant (*bmp15*<sup>-/-</sup>;*gdf9*<sup>-/-</sup>) using a *gdf9* mutant we recently reported (ZFIN line  
number: umo18) (Chen et al., 2022). Although the double mutant showed similar  
665 phenotype to that of *gdf9*<sup>-/-</sup> mutant at 90 dpf with most follicles arrested at PG stage,  
some follicles in most females (9/13) could break the blockade at PG stage to enter  
early PV stage (PV-I), but not further to PV-II and III as seen in *bmp15*<sup>-/-</sup> (Fig. 12A).

Since *inha* deficiency could partially rescue the follicle blockade in both *gdf9* (Chen et  
al., 2022) and *bmp15* mutants as described above, we also created a triple mutant  
(*bmp15*<sup>-/-</sup>;*gdf9*<sup>-/-</sup>;*inha*<sup>-/-</sup>) to see if *inha* mutation had any impact on the double mutant  
670 of *bmp15* and *gdf9*. The results showed that *inha* mutation could also help the double  
mutant (*bmp15*<sup>-/-</sup>;*gdf9*<sup>-/-</sup>) to overcome the follicle blockade to enter vitellogenic growth  
with formation of both cortical alveoli and yolk granules (Fig. 12B). However, the  
vitellogenic follicles were mostly at EV stage without reaching the size range of MV  
stage (EV-MV transition) as seen in *bmp15*<sup>-/-</sup>;*inha*<sup>-/-</sup> and *gdf9*<sup>-/-</sup>;*inha*<sup>-/-</sup> (Fig. 12C).  
675 Follicle composition analysis showed much less vitellogenic follicles in the ovary of  
the triple mutants (*bmp15*<sup>-/-</sup>;*gdf9*<sup>-/-</sup>;*inha*<sup>-/-</sup>) compared to the double mutants (*bmp15*<sup>-/-</sup>;  
*inha*<sup>-/-</sup> or *gdf9*<sup>-/-</sup>;*inha*<sup>-/-</sup>). The ratios of EV-FG follicles (stage III) in *bmp15*<sup>-/-</sup>;*inha*  
<sup>-/-</sup> and *gdf9*<sup>-/-</sup>;*inha*<sup>-/-</sup> were 54.7% and 55.0% respectively while the ratio dropped  
significantly to only 22.6% in the triple mutant (Fig. 12D).

### 680 *Normal spermatogenesis in bmp15 mutant*

At both anatomical and histological levels, the disruption of *bmp15* had no impact on  
testis development and spermatogenesis as observed at 180 dpf. No difference was  
observed either in the double mutant of *bmp15* and *inha* (*bmp15*<sup>-/-</sup>;*inha*<sup>-/-</sup>) and triple  
mutant with *inhbaa* (*bmp15*<sup>-/-</sup>;*inha*<sup>-/-</sup>;*inhbaa*<sup>-/-</sup>) compared with the control fish (Fig.  
685 S3).

## **Discussion**

Folliculogenesis is a highly coordinated developmental process, and the active role  
played by oocytes has been an attractive issue for research in the past twenty years  
(Erickson and Shimasaki, 2000). GDF9 and BMP15 are the first and best characterized  
690 oocyte-derived growth factors that play essential roles in regulating follicle growth and  
maturation (Sanfins et al., 2018). However, in contrast to GDF9 that has been  
demonstrated to be essential for early follicle development and therefore female fertility  
in both mice and zebrafish by loss-of-function studies (Chen et al., 2022; Dong et al.,  
1996), BMP15 shows significant functional variation among different mammalian  
695 species especially between mono-ovulatory (e.g., sheep) and poly-ovulatory (e.g., mice)



species (Otsuka et al., 2011; Persani et al., 2014). The loss of BMP15 in sheep leads to female infertility with ovary being underdeveloped and follicles blocked at primary follicle stage (Braw-Tal et al., 1993; Davis et al., 1992; Galloway et al., 2000; Smith et al., 1997); however, its loss in mice does not generate significant impact on ovarian development and reproductive performance (Yan et al., 2001). In zebrafish, females deficient in *bmp15* were arrested at the PV stage followed by sex reversal to become fertile males as observed in the present study and reported previously (Dranow et al., 2016). Despite these studies, the exact functions of BMP15 remain elusive and its action mechanisms are largely unknown. In this study, we performed extensive genetic analysis on functions of *Bmp15* in folliculogenesis from puberty onset to fertility. More importantly, by generating a series of double and triple mutants with other genes including *inha*, *inhbaa*, and *gdf9*, we obtained novel clues to the mechanisms by which *Bmp15* may work in controlling zebrafish folliculogenesis. Our major discoveries are discussed below.

### 710 *Role of Bmp15 in female puberty onset*

Puberty onset is a major event in reproductive development and maturation. Despite extensive studies, the mechanisms that control puberty onset still remain elusive. Our studies in the past few years have established zebrafish as an excellent model for studying puberty onset (Chakradhar, 2018; Chen and Ge, 2012; Chen and Ge, 2013; Hu et al., 2022; Lu et al., 2020). In females, the appearance of the first wave of PV follicles in the developing ovary or PG-PV transition has been used as the marker for puberty onset (Chen and Ge, 2013). We have demonstrated that body growth is a key factor in controlling puberty onset in zebrafish with 1.8 cm in BL and 100 mg in BW being the threshold for triggering the first PG-PV transition or puberty onset (Chen and Ge, 2013; Hu et al., 2022; Lu et al., 2020). Our recent work on *gdf9* in zebrafish showed that the loss of *gdf9* gene caused a complete arrest of follicle development at PG stage leading to failed puberty onset and therefore female infertility (Chen et al., 2022), similar to that in mice (Dong et al., 1996).

Despite its close relationship with *gdf9*, the loss of *bmp15* gene (also called GDF9B) in zebrafish did not cause a cessation of follicle development at PG stage as seen in *gdf9* mutant (*gdf9*<sup>-/-</sup>). The follicles could develop beyond PG and grow to the full size of PV stage with accumulation of cortical alveoli. However, the mutant fish (*bmp15*<sup>-/-</sup>) showed a significant delay in PG-PV transition or puberty onset. Many fish that had grown beyond the somatic threshold (1.8 cm/100 mg) remained at PG stage. This observation suggests that *Gdf9* and *Bmp15* in zebrafish play differential roles in controlling follicle activation or PG-PV transition with *Gdf9* acting as an essential factor and *Bmp15* being a promoting factor (Fig. 13A and B).

### 730 *Blockade of folliculogenesis in bmp15-deficient females*

In contrast to GDF9 whose loss resulted in complete arrest of follicle development at early stage in both mice (primary follicle) and zebrafish (primary growth) (Chen et al., 2022; Dong et al., 1996). The impacts of BMP15 mutation vary in different mammalian species. The *Bmp15* null mice did not show significant abnormalities in female reproduction. Other than reduced ovulation and fertilization, the female mutant mice had normal ovary and folliculogenesis (Yan et al., 2001). However, the homozygous BMP15 (*fecX*) mutant in sheep exhibited abnormal follicle development from fetal to adult stage. Although follicles could form in the mutant, they failed to develop beyond

the primary stage with abnormal arrangement of somatic follicle cells (Braw-Tal et al., 1993; Smith et al., 1997).

745 In the zebrafish, we showed that the loss of *bmp15* resulted in a complete arrest of  
follicle development at the PV stage characterized with normal formation of cortical  
alveoli but not yolk granules in the oocyte, indicating defects in vitellogenesis. This  
agrees well with a previous study in zebrafish (Dranow et al., 2016). Therefore, both  
Gdf9 and Bmp15 play important roles in controlling early follicle development in  
750 zebrafish, similar to their counterparts in mice and sheep respectively. However, these  
two factors act sequentially at different stages of folliculogenesis, *i.e.*, PG-PV and PV-  
EV transitions, respectively. Gdf9 is mainly involved in controlling PG-PV transition  
(Chen et al., 2022), whereas Bmp15 controls subsequent PV-EV transition, the  
beginning of vitellogenic growth (Fig. 13B).

#### *Roles of bmp15 in maintaining ovarian function and femaleness*

755 Although our data showed that Bmp15 was an oocyte-specific growth factor as in other  
species, it did not seem to affect gonadal differentiation as shown by the normal sex  
ratio of the young *bmp15*<sup>-/-</sup> fish. However, the ratio started to change after about three  
months (~90 dpf) with decreasing females and increasing males, and the mutant fish  
760 became nearly all males at 300 dpf (Fig. 13A). This is similar to the phenotype of *gdf9*  
mutant, which also underwent sex reversal from about 60 dpf to become all males after  
about four months (~120 dpf) (Chen et al., 2022). This phenomenon also occurred in  
some other mutants of zebrafish. For example, the null mutant of FSH receptor (*fshr*  
<sup>-/-</sup>) had underdeveloped ovaries with follicles being blocked at early PG stage followed  
765 by sex reversal to males (Zhang et al., 2015a). In the triple mutant of estrogen receptors  
(*esr1*<sup>-/-</sup>; *esr2a*<sup>-/-</sup>; *esr2b*<sup>-/-</sup>), gonadal differentiation occurred normally and the follicles  
could develop to PV stage with formation of cortical alveoli; however, all follicles  
regressed and the mutant ovaries all changed to testes at later stage (Lu et al., 2017).  
The mutation of epidermal growth factor receptor (*egfra*<sup>-/-</sup>) also resulted in a complete  
770 blockade of follicle development at PG stage followed by sex reversal to males, similar  
to that of *gdf9* mutant (Song et al., 2021).

Interestingly, during the process of sex reversal in *bmp15* mutant, the external female  
and male secondary sex characteristics GP and BTs showed dynamic changes. The BTs  
seemed to be a sensitive marker for the onset of sex reversal as they appeared even  
775 before any testicular tissues were visible in the ovary and therefore coexisted with the  
GP for a short period of time. The mechanisms that triggered sex reversal in *bmp15*  
mutant are unknown. Reduced estrogen levels could be one of the factors involved as  
estrogens are key hormones stimulating Vtg production and therefore yolk formation  
in the oocytes (Hara et al., 2016) and the loss of estrogen receptors resulted in sex  
780 reversal as well (Lu et al., 2017). We further explored this mechanism in the present  
study.

#### *Rescue of bmp15 null phenotypes by simultaneous loss of inha – a novel clue to the mechanism of Bmp15 actions*

Our recent study showed that the loss of *gdf9* gene in zebrafish resulted in a complete  
arrest of follicle development at the PG stage. Surprisingly, double mutation of *gdf9*  
785 and *inha* could rescue the phenotypes of *gdf9*<sup>-/-</sup> to a great extent, including sex reversal,  
formation of cortical alveoli (PG-PV transition) and accumulation of yolk granules

(vitellogenic growth) (Chen et al., 2022). Such rescue is specific because *inha*<sup>-/-</sup> could not rescue the same phenotype of *egfra*<sup>-/-</sup>, *i.e.*, cessation of follicle development at PG stage (Song et al., 2021). To explore if *inha* mutation could rescue the phenotypes of *bmp15* mutant, we created a double mutant for *bmp15* and *inha* (*bmp15*<sup>-/-</sup>;*inha*<sup>-/-</sup>). Surprisingly, simultaneous mutation of *bmp15* and *inha* also rescued the phenotypes of *bmp15*<sup>-/-</sup> females, similar to that seen in *gdf9*<sup>-/-</sup> (Chen et al., 2022), suggesting shared signaling and downstream mechanisms for Gdf9 and Bmp15. The follicles of *bmp15*<sup>-/-</sup>;*inha*<sup>-/-</sup> females could develop beyond the PV stage with accumulation of yolk granules. This provided a valuable tool to explore the mechanisms underlying Bmp15 actions in controlling early follicle development.

Transcriptome analysis showed clearly that the expression pattern of *bmp15*<sup>-/-</sup> was reversed by *inha*<sup>-/-</sup> in the double mutant. Among the biological processes and pathways identified by GO and KEGG analyses on DEGs, we were particularly interested in the TGF- $\beta$  signaling pathway, endocytosis and receptor-mediated endocytosis. TGF- $\beta$  family is well known to be important in reproductive development and function (Knight and Glister, 2006; Trombly et al., 2009) and endocytosis especially receptor-mediated endocytosis is involved in the uptake of Vtg by the growing oocytes (Hiramatsu et al., 2015). This together with the RT-PCR data on expression of specific functional genes such as *cyp19a1a* and *vtg1-7* and measurement of serum E2 and Vtg levels has led us to hypothesize that the blockade of follicles at PV stage without yolk granule formation in *bmp15*<sup>-/-</sup> females might be due to deficiencies in both Vtg biosynthesis in the liver and its uptake by growing oocytes in the ovary.

#### *Roles of estrogens in Bmp15 regulation of vitellogenin synthesis*

Estrogens are the major endocrine hormones that stimulate Vtg biosynthesis in the liver of non-mammalian oviparous vertebrates, therefore playing fundamental roles in vitellogenesis (Polzonetti-Magni et al., 2004). The lack of yolk granule accumulation or failure of vitellogenic growth in *bmp15* mutant zebrafish prompted us to speculate on possible involvement of estrogens in Bmp15 actions. Although the transcriptome analysis on PG follicles did not reveal any expression change of ovarian aromatase (*cyp19a1a*), the enzyme that catalyzes synthesis of estrogens from androgens, RT-PCR analysis on PV follicles demonstrated a significant drop of *cyp19a1a* expression in *bmp15* mutant, suggesting a stimulatory role for Bmp15 in regulating aromatase expression and therefore estrogen secretion and Vtg biosynthesis. This agrees well with a recent report in zebrafish that no *cyp19a1a* expression could be detected by in situ hybridization in the ovary of *bmp15* mutant (Dranow et al., 2016). The stimulation of aromatase expression by BMP15 has also been reported in mammals. Co-treatment of human cumulus granulosa cells with BMP15 and GDF9 greatly enhanced aromatase expression and estradiol secretion in response to FSH probably via Smad2/3 pathway (Hobeika et al., 2019). In agreement with this, the blood estradiol level in the sheep carrying homozygous mutations of *BMP15* was undetectable (Braw-Tal et al., 1993).

Interestingly, the decreased expression of *cyp19a1a* in *bmp15*<sup>-/-</sup> females was rescued and raised to higher levels by simultaneous mutation of *inha* in the double mutant (*bmp15*<sup>-/-</sup>;*inha*<sup>-/-</sup>), accompanied by restored E2 level in the serum, increased Vtg production in the liver, and resumed vitellogenic growth of oocytes with accumulation of yolk granules. However, the follicle growth could only proceed to the MV stage, not LV and FG stage, suggesting a defect of certain regulatory mechanisms at MV stage that prevented MV-LV transition. This will be an interesting issue to explore in future

835 studies. In addition to rescuing vitellogenesis, the loss of *inha* also prevented sex reversal in *bmp15*<sup>-/-</sup>, probably due to the increased estrogen production again.

To further confirm that the lack of vitellogenesis in *bmp15* mutant was due to the reduced expression of *cyp19a1a*, we performed two critical experiments: treatment of *bmp15*<sup>-/-</sup> females with E2 and the double mutant (*bmp15*<sup>-/-</sup>;*inha*<sup>-/-</sup>) with aromatase inhibitor fadrozole. E2 treatment restored vitellogenic growth with yolk granule accumulation in *bmp15*<sup>-/-</sup> follicles and treatment with fadrozole prevented the rescue of the *bmp15*<sup>-/-</sup> phenotype by *inha*<sup>-/-</sup>. These results, together with reduced serum levels of E2 and Vtg in *bmp15*<sup>-/-</sup> females, strongly suggest that one major function of Bmp15 in the zebrafish follicles is to stimulate *cyp19a1a* expression, therefore increasing estrogen production and hepatic Vtg biosynthesis (Fig. 13C).

#### 845 *Roles of activin-inhibin system in Bmp15 regulation of vitellogenic growth*

One of interesting findings from our transcriptome analysis was the significant enrichment of up-regulated genes in the TGF- $\beta$  signaling pathway in the double mutant PG follicles (*bmp15*<sup>-/-</sup>;*inha*<sup>-/-</sup>) compared to the single mutant (*bmp15*<sup>-/-</sup>), suggesting potential roles for TGF- $\beta$  superfamily members in overcoming the *bmp15*<sup>-/-</sup> phenotypes. Among the members up-regulated, activin  $\beta$ Aa subunit (*inhbaa*) was particularly interesting as it was also significantly up-regulated in the double mutant of *gdf9* and *inha* (*gdf9*<sup>-/-</sup>;*inha*<sup>-/-</sup>), which also rescued the deficiency of *gdf9*<sup>-/-</sup> (Chen et al., 2022). The facts that Gdf9 and Bmp15 are closely related oocyte-specific growth factors, and their deficiencies could both be rescued by the simultaneous loss of *inha*, accompanied by significantly increased expression of *inhbaa* raise an interesting question about roles of activin and inhibin in Bmp15 function.

Activin and inhibin are both dimeric proteins consisting of either two  $\beta$  subunits (activins:  $\beta$ A $\beta$ A,  $\beta$ B $\beta$ B and  $\beta$ A $\beta$ B) or one  $\beta$  and one unique  $\alpha$  subunit (inhibin:  $\alpha\beta$ ), all belonging to the TGF- $\beta$  superfamily (Ying, 1988). Although all three  $\beta$  subunits ( $\beta$ A: *inhbaa*, *inhbab*; and  $\beta$ B: *inhbb*) and *inha* were exclusively expressed in zebrafish follicle cells (Poon et al., 2009; Tse and Ge, 2010; Wang and Ge, 2003; Zhao et al., 2022), a recent single cell transcriptome analysis showed that *inha* and *inhbaa* were co-expressed primarily in the granulosa cells (Liu et al., 2022), suggesting that *inhbaa* is likely the major form of  $\beta$  subunits responsible for inhibin production in addition to its self-dimerization to form activin Aa (Zhao et al., 2022). Disruption of *inha* would cause a complete loss of inhibin, which would not only divert *Inhbaa* towards producing more activin Aa ( $\beta$ Aa $\beta$ Aa) but also reduce inhibition of activin action by inhibin, resulting in an overall increase in activin activity. We have proposed previously that activins from the somatic follicle cells may represent a major intrafollicular paracrine pathway, particularly for signaling from the follicle cells to oocyte (Ge, 2005). It is conceivable that the resumption of vitellogenic growth in the double mutant (*bmp15*<sup>-/-</sup>;*inha*<sup>-/-</sup>) might involve enhanced activin activity especially from *inhbaa*. This idea is further supported by the evidence that the resumed vitellogenic growth in *bmp15*<sup>-/-</sup>;*inha*<sup>-/-</sup> was abolished by the loss of *inhbaa* in the triple mutant (*bmp15*<sup>-/-</sup>;*inha*<sup>-/-</sup>;*inhbaa*<sup>-/-</sup>), suggesting a critical mediating role for *inhbaa* in Bmp15 regulation of follicle growth. This is supported by the observation that the expression of *inhbaa* was significantly reduced in *bmp15*<sup>-/-</sup> PV follicles.

Our recent and previous studies have shown that the oocyte is a direct target for activin

880 as evidenced by its expression of all activin receptors and Smad proteins as well as phosphorylation of Smad2 in response to activin treatment (Chen et al., 2022; Tse and Ge, 2010; Wang and Ge, 2003). In addition to oocytes, activin might also participate in the regulation of *cyp19a1a* expression in the follicle cells as suggested by the evidence that the loss of *inhbaa* in the triple mutant (*bmp15*<sup>-/-</sup>;*inha*<sup>-/-</sup>;*inhbaa*<sup>-/-</sup>) abolished the increased expression of *cyp19a1a* in the double mutant (*bmp15*<sup>-/-</sup>;*inha*<sup>-/-</sup>) together with reduced E2 and Vtg levels in the serum. Whether activin works alone or together with other factors such as pituitary FSH and Bmp15 to regulate *cyp19a1a* remains unknown, and it will be an interesting issue to study in the future. In mammals including humans, activin has been widely reported to increase aromatase activity and estrogen production in cultured granulosa cells alone or together with FSH (Chang et al., 2014; Miro and Hillier, 1992; Miro et al., 1991; Mukasa et al., 2003; Xiao and Findlay, 1991). Similar to activin, the oocyte-derived BMP15 and GDF9 also significantly potentiated the actions of FSH in stimulating aromatase expression and estrogen biosynthesis in human granulosa cells (Hobeika et al., 2019) (Fig. 13C).

895 One interesting observation was that although the lack of *inhbaa* in the triple mutant (*bmp15*<sup>-/-</sup>;*inha*<sup>-/-</sup>;*inhbaa*<sup>-/-</sup>) prevented yolk granule formation as seen in the double mutant (*bmp15*<sup>-/-</sup>;*inha*<sup>-/-</sup>), the oocytes could continue to grow to the size close to the EV stage in the absence of yolk granules and without formation of additional cortical alveoli. The mechanism for such further growth of oocytes remains unknown. We hypothesize that the simultaneous mutation of *inha* and *inhbaa* resulted in the loss of both inhibin and activin Aa. Since inhibin antagonizes both activins and BMPs (Wiater and Vale, 2003), the loss of inhibin may also enhance the signaling by other forms of activins and BMPs despite the loss of activin Aa, which may promote oocyte growth. This is supported by our transcriptome data that in addition to *inhbaa*, both BMP type II receptors (*bmpr2a* and *bmpr2b*), one BMP type I receptor (*bmpr1bb*), and one activin receptor-like kinase 1 (*acvr1l1*) were increased in both *inha*<sup>-/-</sup> and *bmp15*<sup>-/-</sup>;*inha*<sup>-/-</sup> follicles. This hypothesis will be tested in future studies. Our observation also suggests that although oocyte growth in fish species is associated with the accumulation of cortical alveoli and yolk granules, it can occur independent of the latter.

#### *Evidence for Bmp15 regulation of vitellogenin uptake – roles of vitellogenin receptors*

910 The lack of vitellogenic growth in *bmp15* mutant females may be due to deficiencies in either Vtg biosynthesis in the liver as discussed above or Vtg uptake by the growing oocytes in the ovary or both. Compared to our knowledge about Vtg expression and regulation, our understanding of Vtg uptake remains rather limited in fish (Hara et al., 2016). It is well known that Vtg proteins in oviparous vertebrates including fish are taken up by the growing oocytes from the blood stream via endocytosis mediated by Vtg receptors and deposited in yolk granules (Stifani et al., 1990). Despite some studies on potential Vtg receptors in fish (Reading et al., 2011; Rodriguez et al., 1996; Tao et al., 1996; Tyler and Lubberink, 1996), the molecular nature of these receptors remains to be characterized. The first putative Vtg receptors in fish were cloned in the rainbow trout by homology-based PCR cloning and demonstrated to belong to low-density lipoprotein receptor (LDLR) superfamily (Prat et al., 1998), which also includes a large number of LDLR-related proteins (LRP). These proteins are primarily involved in endocytosis of various ligands in particular the lipoproteins (Hiramatsu et al., 2013). In striped bass and white perch, Lrp13 was cloned and demonstrated to be a potential Vtg receptor responsible for endocytosis-mediated Vtg uptake (Reading et al., 2014), and

this was also confirmed later in the cutthroat trout (Mushirobira et al., 2015).

In the zebrafish, eight Vtg genes (*vtg1-8*) have been identified in the genome (Yilmaz et al., 2018). Although Vtg receptors have not been characterized in zebrafish, they are most likely members of the LRP family according to the studies in other teleosts (Mushirobira et al., 2015; Reading et al., 2014). Interestingly, our transcriptome data revealed that both endocytosis and receptor-mediated endocytosis pathways were enhanced in *inha*<sup>-/-</sup> and double mutant (*bmp15*<sup>-/-</sup>;*inha*<sup>-/-</sup>), and the genes showing significant increase in expression in the receptor-mediated endocytosis pathway were all members of the LRP family including *lrplab*, *lrp2a*, *lrp5* and *lrp6*. These genes displayed distinct expression profiles during folliculogenesis, which are mostly associated with the vitellogenic growth of the oocyte. The exact roles of these genes in vitellogenesis or Vtg uptake remain to be elucidated. Their significant increase in expression in the double mutant (*bmp15*<sup>-/-</sup>;*inha*<sup>-/-</sup>) follicles has led us to hypothesize that in addition to increasing *cyp19a1a* and *inhbaa* expression, resulting in increased Vtg biosynthesis and oocyte growth, the loss of *inha* may also enhance Vtg uptake at the follicle level, contributing to the rescue of failed yolk accumulation in the *bmp15*<sup>-/-</sup> mutant. Since inhibin is an antagonist of activin, which acts directly on the oocyte via Smad2/3 (Chen et al., 2022), we speculate that the increased activity of activin in *inha*<sup>-/-</sup> could be one of the factors responsible for the up-regulation of Vtg receptors in the oocyte (Fig. 13C). This idea is supported by the evidence that the loss of *inhbaa* in the triple mutant (*bmp15*<sup>-/-</sup>;*inha*<sup>-/-</sup>;*inhbaa*<sup>-/-</sup>) abolished *lrp* expression (*lrplab* and *lrp2a*) and prevented yolk formation.

#### *Differential roles of bmp15 and gdf9 in controlling folliculogenesis*

Gdf9 and Bmp15 are closely related molecules expressed specifically in the oocyte. Their interaction in biosynthesis and function has been studied in both mammals and fish (Peng et al., 2013; Yu et al., 2020). In addition to forming homodimers (GDF9 and BMP15), they can also form heterodimers (GDF9:BMP15), which exhibits much more potent bioactivities than the homodimers (Peng et al., 2013). Our recent study on *gdf9* (Chen et al., 2022) and the present study on *bmp15* showed that although these two factors are both expressed in the oocyte, they play distinct roles in early folliculogenesis by controlling different developmental stages in a sequential manner. The loss of *gdf9* resulted in a complete arrest of follicle development at PG stage without formation of cortical alveoli (Chen et al., 2022), whereas disruption of *bmp15* gene blocked follicles at PV stage with formation of cortical alveoli but not yolk granules (Fig.13B).

To further explore the relationship between Gdf9 and Bmp15, we created a double mutant of the two genes (*bmp15*<sup>-/-</sup>;*gdf9*<sup>-/-</sup>). The double mutant basically phenocopied the *gdf9* single mutant (*gdf9*<sup>-/-</sup>), similar to the double mutant (*Bmp15*<sup>-/-</sup>;*Gdf9*<sup>-/-</sup>) in mice (Yan et al., 2001). However, follicles in some double mutant females could break the blockade seen in *gdf9*<sup>-/-</sup> single mutant to enter early PV stage with formation of small cortical alveoli (PV-I); however, they could not develop further to late PV stages (PV-II and III) as seen in *bmp15*<sup>-/-</sup> single mutant. This is surprising and raises an interesting question about the interactions of Gdf9 and Bmp15 in follicle activation or PG-PV transition. The mechanisms remain unknown at this moment. Our hypothesis is that Gdf9 and Bmp15 may play antagonistic roles in controlling the formation of cortical alveoli, the marker for PG-PV transition, and they act in a sequential manner. At the onset of PG-PV transition, the oocyte may first release Gdf9, which stimulates the biogenesis of cortical alveoli in the oocyte. This is followed by release of Bmp15 at

the onset of PV-EV transition, which stimulates vitellogenesis (vitellogenin synthesis and update) while suppresses the formation of cortical alveoli to create space for yolk granules. Since both Gdf9 and Bmp15 are oocyte-derived factors that act on the surrounding follicle cells, their regulation of oocyte development (formation of cortical alveoli and yolk granules) is likely mediated by factors from the follicle cells in a paracrine manner. The double mutation of *gdf9* and *bmp15* would mean simultaneous loss of both stimulation and inhibition of cortical alveoli, resulting in advancement of some follicles into early PV stage (PV-I), somewhere between *gdf9*<sup>-/-</sup> and *bmp15*<sup>-/-</sup>. This hypothesis will need to be tested and verified by experiments in the future. The idea that Gdf9 and Bmp15 may act in an antagonistic manner has also been proposed in a recent study in Japanese flounder. Overexpression of Gdf9 and Bmp15 in a flounder ovarian cell line could up-regulate and down-regulate steroidogenic enzymes via Smad2/3 and Smad1/5/8 pathways, respectively (Yu et al., 2020). The factors from the follicle cells that mediate Gdf9 and Bmp15 actions remain unknown; however, our data suggest activin as one potential candidate. Recombinant zebrafish Gdf9 could stimulate expression of activin (*inhbaa* and *inhbb*) in cultured follicle cells probably via Smad2/3 pathway (Chen et al., 2017b) and the loss of *gdf9* gene resulted in a significant decrease in *inhbaa* expression (Chen et al., 2022). Similarly, the present study showed that the expression of *inhbaa* also decreased significantly in the PV follicles of *bmp15* mutant (Fig. 13D).

In summary, using genetic analysis involving multiple mutants including *bmp15*, *gdf9*, *inha* and *inhbaa* as well as physiological and pharmacological approaches, the present study provided critical insights into the mechanisms underlying Bmp15 actions, its interactions with the activin-inhibin system, and functional relation with Gdf9 in controlling folliculogenesis. To our knowledge, this represents the most comprehensive genetic study in vertebrates on BMP15, an oocyte-derived growth factor that plays important roles in orchestrating follicle development. Our data strongly support an important role for Bmp15 in controlling vitellogenic growth of follicles in zebrafish and provide critical evidence for its regulation of vitellogenin production via estrogens as well as vitellogenin uptake in the ovary by the growing oocyte via vitellogenin receptors. All these actions involve participation of TGF- $\beta$  family members, particularly activin and inhibin.

## Acknowledgement

We thank Ms. Phoenix Un Ian LEI for the maintenance and management of the zebrafish facility and the Histology Core of the Faculty of Health Sciences for technical support. This study was supported by grants from the University of Macau (MYRG2019-00123-FHS, MYRG2020-00192-FHS and CPG2020-00005-FHS) and The Macau Fund for Development of Science and Technology (FDCT173/2017/A3 and FDCT0132/2019/A3) to WG. KW is supported by the Macau Young Scholars Program (AM2020025).

## References

- Baerwald, A. R., Adams, G. P. and Pierson, R. A. (2012). Ovarian antral folliculogenesis during the human menstrual cycle: a review. *Hum. Reprod. Update* **18**, 73-91.
- Braw-Tal, R., McNatty, K. P., Smith, P., Heath, D. A., Hudson, N. L., Phillips, D.

- J., McLeod, B. J. and Davis, G. H.** (1993). Ovaries of ewes homozygous for the X-linked Inverdale gene (FecXI) are devoid of secondary and tertiary follicles but contain many abnormal structures. *Biol. Reprod.* **49**, 895-907.
- 1020 **Carabatsos, M. J., Elvin, J., Matzuk, M. M. and Albertini, D. F.** (1998). Characterization of oocyte and follicle development in growth differentiation factor-9-deficient mice. *Dev. Biol.* **204**, 373-384.
- 1025 **Celestino, J. J., Lima-Verde, I. B., Bruno, J. B., Matos, M. H., Chaves, R. N., Saraiva, M. V., Silva, C. M., Faustino, L. R., Rossetto, R., Lopes, C. A., et al.** (2011). Steady-state level of bone morphogenetic protein-15 in goat ovaries and its influence on in vitro development and survival of preantral follicles. *Mol. Cell. Endocrinol.* **338**, 1-9.
- 1030 **Chakradhar, S.** (2018). Animals on the verge: What different species can teach us about human puberty. *Nat. Med.* **24**, 114-117.
- Chang, H. M., Cheng, J. C., Klausen, C., Taylor, E. L. and Leung, P. C.** (2014). Effects of recombinant activins on steroidogenesis in human granulosa-lutein cells. *J. Clin. Endocrinol. Metab.* **99**, E1922-1932.
- 1035 **Chen, A. Q., Liu, Z. W., Yang, Z. G. and Leng, X. J.** (2012). Characterization of bmp15 and its regulation by human chorionic gonadotropin in the follicle of gibel carp (*Carassius auratus gibelio*). *Comp. Biochem. Physiol. B Biochem. Mol. Biol.* **163**, 121-128.
- 1040 **Chen, W. and Ge, W.** (2012). Ontogenic expression profiles of gonadotropins (*fshb* and *lhb*) and growth hormone (*gh*) during sexual differentiation and puberty onset in female zebrafish. *Biol. Reprod.* **86**, 73.
- Chen, W. and Ge, W.** (2013). Gonad differentiation and puberty onset in the zebrafish: evidence for the dependence of puberty onset on body growth but not age in females. *Mol. Reprod. Dev.* **80**, 384-392.
- 1045 **Chen, W., Lau, S. W., Fan, Y., Wu, R. S. S. and Ge, W.** (2017a). Juvenile exposure to bisphenol A promotes ovarian differentiation but suppresses its growth - Potential involvement of pituitary follicle-stimulating hormone. *Aquat. Toxicol.* **193**, 111-121.
- 1050 **Chen, W., Liu, L. and Ge, W.** (2017b). Expression analysis of growth differentiation factor 9 (*Gdf9/gdf9*), anti-mullerian hormone (*Amh/amh*) and aromatase (*Cyp19a1a/cyp19a1a*) during gonadal differentiation of the zebrafish, *Danio rerio*. *Biol. Reprod.* **96**, 401-413.
- 1055 **Chen, W., Zhai, Y., Zhu, B., Wu, K., Fan, Y., Zhou, X., Liu, L. and Ge, W.** (2022). Loss of growth differentiation factor 9 causes an arrest of early folliculogenesis in zebrafish – a novel insight into its action mechanism. *bioRxiv*, DOI: 10.1101/2022.1107.1101.498398.
- Clelland, E., Kohli, G., Campbell, R. K., Sharma, S., Shimasaki, S. and Peng, C.** (2006). Bone morphogenetic protein-15 in the zebrafish ovary: complementary deoxyribonucleic acid cloning, genomic organization, tissue distribution, and role in oocyte maturation. *Endocrinology* **147**, 201-209.
- 1060 **Clelland, E. S., Tan, Q., Balofsky, A., Lacivita, R. and Peng, C.** (2007). Inhibition of premature oocyte maturation: a role for bone morphogenetic protein 15 in



- zebrafish ovarian follicles. *Endocrinology* **148**, 5451-5458.
- 1065 **Dai, X., Pu, D., Wang, L., Cheng, X., Liu, X., Yin, Z. and Wang, Z.** (2021).  
Emergence of breeding tubercles and puberty onset in male zebrafish:  
evidence for a dependence on body growth. *J. Fish Biol.* **99**, 1071-1078.
- Davis, G. H., McEwan, J. C., Fennessy, P. F., Dodds, K. G., McNatty, K. P. and O,  
W. S.** (1992). Infertility due to bilateral ovarian hypoplasia in sheep  
homozygous (FecXI FecXI) for the Inverdale prolificacy gene located on the  
X chromosome. *Biol. Reprod.* **46**, 636-640.
- 1070 **Dong, J., Albertini, D. F., Nishimori, K., Kumar, T. R., Lu, N. and Matzuk, M. M.**  
(1996). Growth differentiation factor-9 is required during early ovarian  
folliculogenesis. *Nature* **383**, 531-535.
- Dranow, D. B., Hu, K., Bird, A. M., Lawry, S. T., Adams, M. T., Sanchez, A.,  
Amatruda, J. F. and Draper, B. W.** (2016). Bmp15 Is an oocyte-produced  
1075 signal required for maintenance of the adult female sexual phenotype in  
zebrafish. *PLoS Genet.* **12**, e1006323.
- Dube, J. L., Wang, P., Elvin, J., Lyons, K. M., Celeste, A. J. and Matzuk, M. M.**  
(1998). The bone morphogenetic protein 15 gene is X-linked and expressed in  
oocytes. *Mol. Endocrinol.* **12**, 1809-1817.
- 1080 **Eppig, J. J.** (2001). Oocyte control of ovarian follicular development and function in  
mammals. *Reproduction* **122**, 829-838.
- Erickson, G. F. and Shimasaki, S.** (2000). The role of the oocyte in folliculogenesis.  
*Trends Endocrinol. Metab.* **11**, 193-198.
- Erickson, G. F. and Shimasaki, S.** (2001). The physiology of folliculogenesis: the  
1085 role of novel growth factors. *Fertil. Steril.* **76**, 943-949.
- Galloway, S. M., McNatty, K. P., Cambridge, L. M., Laitinen, M. P., Juengel, J.  
L., Jokiranta, T. S., McLaren, R. J., Luiro, K., Dodds, K. G.,  
Montgomery, G. W., et al.** (2000). Mutations in an oocyte-derived growth  
factor gene (BMP15) cause increased ovulation rate and infertility in a dosage-  
1090 sensitive manner. *Nat. Genet.* **25**, 279-283.
- Garcia-Lopez, A., Sanchez-Amaya, M. I., Halm, S., Astola, A. and Prat, F.** (2011).  
Bone morphogenetic protein 15 and growth differentiation factor 9 expression  
in the ovary of European sea bass (*Dicentrarchus labrax*): cellular  
localization, developmental profiles, and response to unilateral ovariectomy.  
1095 *Gen. Comp. Endocrinol.* **174**, 326-334.
- Ge, W.** (2005). Intrafollicular paracrine communication in the zebrafish ovary: the  
state of the art of an emerging model for the study of vertebrate  
folliculogenesis. *Mol. Cell. Endocrinol.* **237**, 1-10.
- Ge, W.** (2018). Zebrafish. In *Encyclopedia of Reproduction* (ed. M. K. Skinner), pp.  
1100 704-710: Academic Press: Elsevier.
- Gilchrist, R. B., Lane, M. and Thompson, J. G.** (2008). Oocyte-secreted factors:  
regulators of cumulus cell function and oocyte quality. *Hum. Reprod. Update*  
**14**, 159-177.
- Hanrahan, J. P., Gregan, S. M., Mulsant, P., Mullen, M., Davis, G. H., Powell, R.  
and Galloway, S. M.** (2004). Mutations in the genes for oocyte-derived  
1105

- growth factors GDF9 and BMP15 are associated with both increased ovulation rate and sterility in Cambridge and Belclare sheep (*Ovis aries*). *Biol. Reprod.* **70**, 900-909.
- 1110 **Hara, A., Hiramatsu, N. and Fujita, T.** (2016). Vitellogenesis and choriogenesis in fishes. *Fish. Sci.* **82**, 187-202.
- He, Z., Wu, Y., Xie, J., Wang, T., Zhang, L. and Zhang, W.** (2012). Growth differentiation factor 9 (Gdf9) was localized in the female as well as male germ cells in a protogynous hermaphroditic teleost fish, ricefield eel *Monopterus albus*. *Gen. Comp. Endocrinol.* **178**, 355-362.
- 1115 **Hillier, S. G.** (1994). Current concepts of the roles of follicle stimulating hormone and luteinizing hormone in folliculogenesis. *Hum. Reprod.* **9**, 188-191.
- Hiramatsu, N., Luo, W., Reading, B. J., Sullivan, C. V., Mizuta, H., Ryu, Y. W., Nishimiya, O., Todo, T. and Hara, A.** (2013). Multiple ovarian lipoprotein receptors in teleosts. *Fish Physiol. Biochem.* **39**, 29-32.
- 1120 **Hiramatsu, N., Todo, T., Sullivan, C. V., Schilling, J., Reading, B. J., Matsubara, T., Ryu, Y. W., Mizuta, H., Luo, W., Nishimiya, O., et al.** (2015). Ovarian yolk formation in fishes: Molecular mechanisms underlying formation of lipid droplets and vitellogenin-derived yolk proteins. *Gen. Comp. Endocrinol.* **221**, 9-15.
- 1125 **Hobeika, E., Armouti, M., Kala, H., Fierro, M. A., Winston, N. J., Scoccia, B., Zamah, A. M. and Stocco, C.** (2019). Oocyte-secreted factors synergize with FSH to promote aromatase expression in primary human cumulus cells. *J. Clin. Endocrinol. Metab.* **104**, 1667-1676.
- Hu, Z., Ai, N., Chen, W., Wong, Q. W. and Ge, W.** (2022). Leptin and Its Signaling Are Not Involved in Zebrafish Puberty Onset. *Biol. Reprod.* **106**, 928-942.
- 1130 **Hussein, T. S., Froiland, D. A., Amato, F., Thompson, J. G. and Gilchrist, R. B.** (2005). Oocytes prevent cumulus cell apoptosis by maintaining a morphogenic paracrine gradient of bone morphogenetic proteins. *J. Cell Sci.* **118**, 5257-5268.
- 1135 **Hwang, W. Y., Fu, Y., Reyon, D., Maeder, M. L., Tsai, S. Q., Sander, J. D., Peterson, R. T., Yeh, J. R. and Joung, J. K.** (2013). Efficient genome editing in zebrafish using a CRISPR-Cas system. *Nat. Biotechnol.* **31**, 227-229.
- Jao, L. E., Wente, S. R. and Chen, W.** (2013). Efficient multiplex biallelic zebrafish genome editing using a CRISPR nuclease system. *Proc. Natl. Acad. Sci. U.S.A.* **110**, 13904-13909.
- 1140 **Knight, P. G. and Glister, C.** (2006). TGF- $\beta$  superfamily members and ovarian follicle development. *Reproduction* **132**, 191-206.
- Li, C. W. and Ge, W.** (2011). Spatiotemporal expression of bone morphogenetic protein family ligands and receptors in the zebrafish ovary: a potential paracrine-signaling mechanism for oocyte-follicle cell communication. *Biol. Reprod.* **85**, 977-986.
- 1145 **Lima, I. M., Brito, I. R., Rossetto, R., Duarte, A. B., Rodrigues, G. Q., Saraiva, M. V., Costa, J. J., Donato, M. A., Peixoto, C. A., Silva, J. R., et al.** (2012). BMPRII and BMPRII mRNA expression levels in goat ovarian follicles and

- 1150 the in vitro effects of BMP-15 on preantral follicle development. *Cell Tissue Res.* **348**, 225-238.
- Liu, L. and Ge, W.** (2007). Growth differentiation factor 9 and its spatiotemporal expression and regulation in the zebrafish ovary. *Biol. Reprod.* **76**, 294-302.
- 1155 **Liu, Y., Kassack, M. E., McFaul, M. E., Christensen, L. N., Siebert, S., Wyatt, S. R., Kamei, C. N., Horst, S., Arroyo, N., Drummond, I. A., et al.** (2022). Single-cell transcriptome reveals insights into the development and function of the zebrafish ovary. *eLife* **11**, e76014.
- Lu, H., Cui, Y., Jiang, L. and Ge, W.** (2017). Functional analysis of nuclear estrogen receptors in zebrafish reproduction by genome editing approach. 1160 *Endocrinology* **158**, 2292-2308.
- Lu, H., Zhao, C., Zhu, B., Zhang, Z. and Ge, W.** (2020). Loss of inhibin advances follicle activation and female puberty onset but blocks oocyte maturation in zebrafish. *Endocrinology* **161**, 1-19.
- Matzuk, M., Burns, K. H., Viveiros, M. M. and Eppig, J. J.** (2002). Intercellular communication in the mammalian ovary: oocytes carry the conversation. 1165 *Science* **296**.
- McPherron, A. C. and Lee, S. J.** (1993). GDF-3 and GDF-9: two new members of the transforming growth factor- $\beta$  superfamily containing a novel pattern of cysteines. *J. Biol. Chem.* **268**, 3444-3449.
- 1170 **Meeker, N., Hutchinson, S., Ho, L. and Trede, N.** (2007). Method for isolation of PCR-ready genomic DNA from zebrafish tissues. *Biotechniques* **43**, 610-614.
- Miro, F. and Hillier, S. G.** (1992). Relative effects of activin and inhibin on steroid hormone synthesis in primate granulosa cells. *J. Clin. Endocrinol. Metab.* **75**, 1556-1561.
- 1175 **Miro, F., Smyth, C. D. and Hillier, S. G.** (1991). Development-related effects of recombinant activin on steroid synthesis in rat granulosa cells. *Endocrinology* **129**, 3388-3394.
- Monniaux, D.** (2016). Driving folliculogenesis by the oocyte-somatic cell dialog: Lessons from genetic models. *Theriogenology* **86**, 41-53.
- 1180 **Mukasa, C., Nomura, M., Tanaka, T., Tanaka, K., Nishi, Y., Okabe, T., Goto, K., Yanase, T. and Nawata, H.** (2003). Activin signaling through type IB activin receptor stimulates aromatase activity in the ovarian granulosa cell-like human granulosa (KGN) cells. *Endocrinology* **144**, 1603-1611.
- Mushirobira, Y., Mizuta, H., Luo, W., Todo, T., Hara, A., Reading, B. J., Sullivan, C. V. and Hiramatsu, N.** (2015). Molecular cloning and partial 1185 characterization of a low-density lipoprotein receptor-related protein 13 (Lrp13) involved in vitellogenin uptake in the cutthroat trout (*Oncorhynchus clarki*). *Mol. Reprod. Dev.* **82**, 986-1000.
- Orisaka, M., Miyazaki, Y., Shirafuji, A., Tamamura, C., Tsuyoshi, H., Tsang, B. K. and Yoshida, Y.** (2021). The role of pituitary gonadotropins and 1190 intraovarian regulators in follicle development: A mini-review. *Reprod. Med. Biol.* **20**, 169-175.
- Otsuka, F., McTavish, K. J. and Shimasaki, S.** (2011). Integral role of GDF-9 and

- BMP-15 in ovarian function. *Mol. Reprod. Dev.* **78**, 9-21.
- 1195 **Otsuka, F., Yamamoto, S., Erickson, G. F. and Shimasaki, S.** (2001). Bone morphogenetic protein-15 inhibits follicle-stimulating hormone (FSH) action by suppressing FSH receptor expression. *J. Biol. Chem.* **276**, 11387-11392.
- Otsuka, F., Yao, Z., Lee, T., Yamamoto, S., Erickson, G. F. and Shimasaki, S.** (2000). Bone morphogenetic protein-15 - Identification of target cells and biological functions. *J. Biol. Chem.* **275**, 39523-39528.
- 1200 **Palermo, R.** (2007). Differential actions of FSH and LH during folliculogenesis. *Reprod. Biomed. Online* **15**, 326-337.
- Palomino, J., Herrera, G., Dettleff, P. and Martinez, V.** (2014). Growth differentiation factor 9 and bone morphogenetic protein 15 expression in previtellogenic oocytes and during early embryonic development of Yellow-tail Kingfish *Seriola lalandi*. *Biol. Res.* **47**, 60.
- 1205 **Peng, J., Li, Q., Wigglesworth, K., Rangarajan, A., Kattamuri, C., Peterson, R. T., Eppig, J. J., Thompson, T. B. and Matzuk, M. M.** (2013). Growth differentiation factor 9:bone morphogenetic protein 15 heterodimers are potent regulators of ovarian functions. *Proc. Natl. Acad. Sci. U.S.A.* **110**, E776-785.
- 1210 **Persani, L., Rossetti, R., Di Pasquale, E., Cacciatore, C. and Fabre, S.** (2014). The fundamental role of bone morphogenetic protein 15 in ovarian function and its involvement in female fertility disorders. *Hum. Reprod. Update* **20**, 869-883.
- Polzonetti-Magni, A. M., Mosconi, G., Soverchia, L., Kikuyama, S. and Carnevali, O.** (2004). Multihormonal control of vitellogenesis in lower vertebrates. *Int. Rev. Cytol.* **239**, 1-46.
- 1215 **Poon, S. K., So, W. K., Yu, X., Liu, L. and Ge, W.** (2009). Characterization of inhibin  $\alpha$  subunit (*inha*) in the zebrafish: evidence for a potential feedback loop between the pituitary and ovary. *Reproduction* **138**, 709-719.
- 1220 **Prat, F., Coward, K., Sumpter, J. P. and Tyler, C. R.** (1998). Molecular characterization and expression of two ovarian lipoprotein receptors in the rainbow trout, *Oncorhynchus mykiss*. *Biol. Reprod.* **58**, 1146-1153.
- Qin, M., Xie, Q., Wu, K., Zhou, X. and Ge, W.** (2022). Loss of Nobox prevents ovarian differentiation from juvenile ovaries in zebrafish. *Biol. Reprod.* **106**, 1254-1266.
- 1225 **Qin, M., Zhang, Z., Song, W., Wong, Q. W., Chen, W., Shirgaonkar, N. and Ge, W.** (2018). Roles of Figla/*figla* in juvenile ovary development and follicle formation during zebrafish gonadogenesis. *Endocrinology* **159**, 3699-3722.
- 1230 **Reading, B. J., Hiramatsu, N., Schilling, J., Molloy, K. T., Glassbrook, N., Mizuta, H., Luo, W., Baltzegar, D. A., Williams, V. N., Todo, T., et al.** (2014). Lrp13 is a novel vertebrate lipoprotein receptor that binds vitellogenins in teleost fishes. *J. Lipid Res.* **55**, 2287-2295.
- Reading, B. J., Hiramatsu, N. and Sullivan, C. V.** (2011). Disparate binding of three types of vitellogenin to multiple forms of vitellogenin receptor in white perch. *Biol. Reprod.* **84**, 392-399.
- 1235 **Rodriguez, J. N., Bon, E. and LeMenn, F.** (1996). Vitellogenin receptors during vitellogenesis in the rainbow trout *Oncorhynchus mykiss*. *J. Exp. Zool.* **274**,

163-170.

- 1240 **Rossetti, R., Di Pasquale, E., Marozzi, A., Bione, S., Toniolo, D., Grammatico, P., Nelson, L. M., Beck-Peccoz, P. and Persani, L.** (2009). BMP15 mutations associated with primary ovarian insufficiency cause a defective production of bioactive protein. *Hum. Mutat.* **30**, 804-810.
- 1245 **Rossetti, R., Ferrari, I., Bestetti, I., Moleri, S., Brancati, F., Petrone, L., Finelli, P. and Persani, L.** (2020). Fundamental role of BMP15 in human ovarian folliculogenesis revealed by null and missense mutations associated with primary ovarian insufficiency. *Hum. Mutat.* **41**, 983-997.
- Sanfins, A., Rodrigues, P. and Albertini, D. F.** (2018). GDF-9 and BMP-15 direct the follicle symphony. *J. Assist. Reprod. Genet.* **35**, 1741-1750.
- 1250 **Smith, P., O, W. S., Corrigan, K. A., Smith, T., Lundy, T., Davis, G. H. and McNatty, K. P.** (1997). Ovarian morphology and endocrine characteristics of female sheep fetuses that are heterozygous or homozygous for the inverdale prolificacy gene (*fecX1*). *Biol. Reprod.* **57**, 1183-1192.
- 1255 **Song, W., Lu, H., Wu, K., Zhang, Z., Shuk-Wa Lau, E. and Ge, W.** (2020). Genetic evidence for estrogenicity of bisphenol A in zebrafish gonadal differentiation and its signalling mechanism. *J. Hazard. Mater.* **386**, 121886.
- Song, Y., Chen, W., Zhu, B. and Ge, W.** (2021). Disruption of epidermal growth factor receptor but not EGF blocks follicle activation in zebrafish ovary. *Front. Cell Dev. Biol.* **9**, 750888.
- 1260 **Stifani, S., Le Menn, F., Rodriguez, J. N. and Schneider, W. J.** (1990). Regulation of oogenesis: the piscine receptor for vitellogenin. *Biochim. Biophys. Acta* **1045**, 271-279.
- 1265 **Su, Y. Q., Sugiura, K., Li, Q., Wigglesworth, K., Matzuk, M. M. and Eppig, J. J.** (2010). Mouse oocytes enable LH-induced maturation of the cumulus-oocyte complex via promoting EGF receptor-dependent signaling. *Mol. Endocrinol.* **24**, 1230-1239.
- 1270 **Su, Y. Q., Wu, X., O'Brien, M. J., Pendola, F. L., Denegre, J. N., Matzuk, M. M. and Eppig, J. J.** (2004). Synergistic roles of BMP15 and GDF9 in the development and function of the oocyte-cumulus cell complex in mice: genetic evidence for an oocyte-granulosa cell regulatory loop. *Dev. Biol.* **276**, 64-73.
- Sutton, M., Gilchrist, R. and Thompson, J.** (2003). Effects of in-vivo and in-vitro environments on the metabolism of the cumulus-oocyte complex and its influence on oocyte developmental capacity. *Hum. Reprod. Update* **9**, 35-48.
- 1275 **Swanson, P., Dickey, J. T. and Campbell, B.** (2003). Biochemistry and physiology of fish gonadotropins. *Fish Physiol. Biochem.* **28**, 53-59.
- Tan, Q., Balofsky, A., Weisz, K. and Peng, C.** (2009). Role of activin, transforming growth factor- $\beta$  and bone morphogenetic protein 15 in regulating zebrafish oocyte maturation. *Comp. Biochem. Physiol. A Mol. Integr. Physiol.* **153**, 18-23.
- 1280 **Tao, Y. X., Berlinsky, D. L. and Sullivan, C. V.** (1996). Characterization of a vitellogenin receptor in white perch (*Morone americana*). *Biol. Reprod.* **55**,

646-656.

- Trombly, D. J., Woodruff, T. K. and Mayo, K. E.** (2009). Roles for transforming growth factor beta superfamily proteins in early folliculogenesis. *Semin. Reprod. Med.* **27**, 14-23.
- 1285
- Tse, A. C. and Ge, W.** (2010). Spatial localization of EGF family ligands and receptors in the zebrafish ovarian follicle and their expression profiles during folliculogenesis. *Gen. Comp. Endocrinol.* **167**, 397-407.
- Tyler, C. R. and Lubberink, K.** (1996). Identification of four ovarian receptor proteins that bind vitellogenin but not other homologous plasma lipoproteins in the rainbow trout, *Oncorhynchus mykiss*. *J. Comp. Physiol. B* **166**, 11-20.
- 1290
- Wang, Y. and Ge, W.** (2003). Spatial expression patterns of activin and its signaling system in the zebrafish ovarian follicle: evidence for paracrine action of activin on the oocytes. *Biol. Reprod.* **69**, 1998-2006.
- 1295
- Wiater, E. and Vale, W.** (2003). Inhibin is an antagonist of bone morphogenetic protein signaling. *J. Biol. Chem.* **278**, 7934-7941.
- Wong, Q. W., Sun, M. A., Lau, S. W., Parsania, C., Zhou, S., Zhong, S. and Ge, W.** (2018). Identification and characterization of a specific 13-miRNA expression signature during follicle activation in the zebrafish ovary. *Biol. Reprod.* **98**, 42-53.
- 1300
- Wu, G. C., Luo, J. W., Li, H. W., Huang, C. H. and Chang, C. F.** (2017). Robust *gdf9* and *bmp15* expression in the oocytes of ovotestes through the Figla-independent pathway in the hermaphroditic black porgy, *Acanthopagrus schlegelii*. *PLoS One* **12**.
- 1305
- Wu, K., Song, W., Zhang, Z. and Ge, W.** (2020). Disruption of *dmrt1* rescues the all-male phenotype of the *cyp19a1a* mutant in zebrafish - a novel insight into the roles of aromatase/estrogens in gonadal differentiation and early folliculogenesis. *Development* **147**.
- Xiao, S. and Findlay, J. K.** (1991). Interactions between activin and follicle-stimulating hormone-suppressing orotein and their mechanisms of action on cultured rat granulosa cells. *Mol. Cell. Endocrinol.* **79**, 99-107.
- 1310
- Yadav, H. and Lal, B.** (2019). Cellular localization and seasonal variation in BMP15 expression in ovary of the catfish *Clarias batrachus* and its role in ovarian steroidogenesis. *Theriogenology* **129**, 14-22.
- 1315
- Yan, C., Wang, P., DeMayo, J., DeMayo, F. J., Elvin, J. A., Carino, C., Prasad, S. V., Skinner, S. S., Dunbar, B. S., Dube, J. L., et al.** (2001). Synergistic roles of bone morphogenetic protein 15 and growth differentiation factor 9 in ovarian function. *Mol. Endocrinol.* **15**, 854-866.
- Yilmaz, O., Patinote, A., Nguyen, T. and Bobe, J.** (2018). Multiple vitellogenins in zebrafish (*Danio rerio*): quantitative inventory of genes, transcripts and proteins, and relation to egg quality. *Fish Physiol. Biochem.* **44**, 1509-1525.
- 1320
- Ying, S. Y.** (1988). Inhibins, activins, and follistatins: gonadal proteins modulating the secretion of follicle-stimulating hormone. *Endocr. Rev.* **9**, 267-293.
- Yoshino, O., McMahan, H. E., Sharma, S. and Shimasaki, S.** (2006). A unique preovulatory expression pattern plays a key role in the physiological functions
- 1325

of BMP-15 in the mouse. *Proc. Natl. Acad. Sci. U.S.A.* **103**, 10678-10683.

- 1330 **Yu, H., Wang, Y., Wang, M., Liu, Y., Cheng, J. and Zhang, Q.** (2020). Growth differentiation factor 9 (*gdf9*) and bone morphogenetic protein 15 (*bmp15*) are potential intraovarian regulators of steroidogenesis in Japanese flounder (*Paralichthys olivaceus*). *Gen. Comp. Endocrinol.* **297**, 113547.
- Zhang, Z., Lau, S. W., Zhang, L. and Ge, W.** (2015a). Disruption of zebrafish follicle-stimulating hormone receptor (*fshr*) but not luteinizing hormone receptor (*lhcr*) gene by TALEN leads to failed follicle activation in females followed by sexual reversal to males. *Endocrinology* **156**, 3747-3762.
- 1335 **Zhang, Z., Zhu, B. and Ge, W.** (2015b). Genetic analysis of zebrafish gonadotropin (FSH and LH) functions by TALEN-mediated gene disruption. *Mol. Endocrinol.* **29**, 76-98.
- Zhao, C., Zhai, Y., Geng, R., Wu, K., Song, W., Ai, N. and Ge, W.** (2022). Genetic analysis of activin/inhibin  $\beta$  subunits in zebrafish development and reproduction. *bioRxiv*, DOI: 10.1101/2022.1109.1123.509125.
- 1340 **Zhou, R., Tsang, A. H., Lau, S. W. and Ge, W.** (2011). Pituitary adenylate cyclase-activating polypeptide (PACAP) and its receptors in the zebrafish ovary: evidence for potentially dual roles of PACAP in controlling final oocyte maturation. *Biol. Reprod.* **85**, 615-625.
- 1345 **Zhu, B., Pardeshi, L., Chen, Y. and Ge, W.** (2018). Transcriptomic analysis for differentially expressed genes in ovarian follicle activation in the zebrafish. *Front. Endocrinol. (Lausanne)* **9**, 593.
- Zinski, J., Tajer, B. and Mullins, M. C.** (2018). TGF-beta Family Signaling in Early Vertebrate Development. *Cold Spring Harb. Perspect. Biol.* **10**, a033274.
- 1350

## Figure legends

**Fig. 1 Spatiotemporal expression of *bmp15* and other genes in the follicle and during folliculogenesis.** (A) Spatial distribution of gene expression in the FG follicle. The housekeeping gene *efla* was expressed in both oocyte and follicle layer, whereas the marker genes *lhcr* and *gdf9* were expressed in the follicle layer and denuded oocyte respectively, indicating clean separation of the two compartments. The expression of *bmp15* was detected exclusively in the denuded oocyte, whereas *inha*, *inhbaa* and two BMP type II receptors (*bmpr2a* and *bmpr2b*) were detected only in the follicle layers. In addition, *lrp1ab*, *lrp5* and *lrp6* were all expressed in both follicle layer and oocyte whereas *lrp2a* was exclusively expressed in the follicle layer. (B) Temporal expression profiles of *bmp15* and other genes during folliculogenesis. The expression patterns of *fshr* and *lhcr* were used as the internal reference for appropriate staging of the follicles. The relative mRNA levels were determined by real-time qPCR, normalized to *efla*, and expressed as fold change compared with the levels at the PG stage. The values are the mean  $\pm$  SEM (n=3 fish) from a representative experiment and analyzed by ANOVA followed by the Tukey HSD for multiple comparisons. Different letters indicate statistical significance (P < 0.05). PG, primary growth; PV, previtellogenic; EV, early vitellogenic; MV, mid-vitellogenic; LV, late vitellogenic; FG, full-grown.

1355

1360

1365

**Fig. 2 Delayed follicle activation and puberty onset in *bmp15*-deficient females.** (A) Phenotype analysis of the early follicle development and PG–PV transition in control (*bmp15*<sup>+/-</sup>) and mutant (*bmp15*<sup>-/-</sup>) fish at prepubertal and pubertal stage (40–60 dpf). The boxed areas are shown at higher magnification below. The BL (cm) and BW (mg) of each fish are shown on the top. In control fish (*bmp15*<sup>+/-</sup>), PV follicles containing cortical alveoli started to appear when their BL and BW reached the threshold for puberty onset (1.80 cm/100 mg). However, PV follicles did not appear in many *bmp15* mutant individuals although their body size had reached the threshold. (B) Classification of PV follicles. According to the size and number of layers of the cortical vesicle, the PV stage can be further divided into three sub-stages: PV-I, PV-II and PV-III. (C and D) Correlation between PG-PV transition and body size [BL (cm) and BW (mg)]. Dots in different color represent different stages of follicles. The number in the box indicates the sample size. The thresholds in control females were 1.8 cm and/or 100 mg while the thresholds in the mutant were 2.2 cm and/or 130 mg. (E) Delayed puberty onset in the mutant (*bmp15*<sup>-/-</sup>) fish at 45 dpf (n=3 batches). The values are expressed as mean ± SEM and analyzed by t-test (\*\*\*) P < 0.001). (F) Histological analysis of the control and mutant fish at 50 dpf. All individuals (n=6) in the control group had reached PV-III stage, while some of the mutants could only grow to PV-I and/or PV-II stage (5/7) and others remained in the PG stage (2/7). (G) Analysis of follicle composition at 50 dpf (n=7). Compared with the control, the *bmp15*<sup>-/-</sup> ovary contained significantly more PG follicles but less PV-III follicles. The values are expressed as mean ± SEM and analyzed by ANOVA followed by the Tukey HSD for multiple comparisons (\*\* P < 0.01; \*\*\* P < 0.001).

**Fig. 3 Blocked folliculogenesis in *bmp15*-deficient females.** (A) Histology analysis of the control (*bmp15*<sup>+/-</sup>) and mutant (*bmp15*<sup>-/-</sup>) fish at 120 dpf. Follicle development was arrested at PV stage in *bmp15*<sup>-/-</sup> mutant. (B) Size distribution of follicles in the control (*bmp15*<sup>+/-</sup>) and mutant (*bmp15*<sup>-/-</sup>) fish at 120 dpf (n=3). The mutant follicles could grow to the size of PV stage only (~250 μm), while the control follicles could reach FG stage (> 650 μm). (C) Follicle composition analysis at 120 dpf. Compared with the control, the *bmp15*<sup>-/-</sup> ovary contained significantly more PG (stage I) follicles but no vitellogenic follicles (EV–FG, stage III). The values are expressed as mean ± SEM (n=6) and analyzed by ANOVA followed by the Tukey HSD for multiple comparisons (\*\*\*) P < 0.001).

**Fig. 4 Sex reverse in *bmp15*-deficient females.** (A) Histology analysis of the mutant (*bmp15*<sup>-/-</sup>) at 80 and 210 dpf. In addition to degenerating ovaries, individuals with ovotestes (♀/♂) were increasingly observed from 80 to 120 dpf, indicating a female-to-male sex reversal. Asterisk, degenerating oocytes; T, testicular tissue. (B) Morphology, gross anatomy, secondary sexual characteristics (GP and BTs) and gonadal histology. The genital papilla (GP, red arrow) was prominent at the cloaca in females while the breeding tubercles (BTs, red arrows) were present on the pectoral fins of males. T, testicular tissue; SC, spermatocytes; SZ, spermatozoa. (C) Quantification of BT areas in the control and *bmp15* mutant undergoing different stages of sex reversal (stage I–IV). The white color marks the BT area for quantification. Stage I and IV represent female and male respectively whereas stage II and III represent transitional stages of sex reversal. The values are expressed as mean ± SEM (n=4) and analyzed by ANOVA followed by Tukey HSD for multiple comparisons. Different letters indicate statistical significance (P < 0.05). (D) Gonadosomatic index (GSI, gonad weight/body weight) of the control (*bmp15*<sup>+/-</sup>) and mutant (*bmp15*<sup>-/-</sup>) fish at 120 dpf.



The GSI of stage I mutant was significantly lower than in the control. The values are expressed as mean  $\pm$  SEM (n=5) and analyzed by ANOVA followed by the Tukey HSD for multiple comparisons. Different letters indicate statistical significance ( $P < 0.05$ ). (E) Change of sex ratios during gonadal development in *bmp15*<sup>+/-</sup> and *bmp15*<sup>-/-</sup> fish from 50 to 300 dpf. The sex ratios in control fish were around 50:50 ( $\sigma$ : $\rho$ ) at all times examined; however, intersexuality started in the mutant around 90 dpf with increasing males (stage IV). The data were analyzed by Chi-squared test compared with the control (\*\*  $P < 0.01$ ; \*\*\*  $P < 0.001$ ).

**Fig. 5 Rescue of *bmp15* deficiency by *inha* mutation.** (A) Histological examination of gonads at 120 dpf. The follicle development was arrested at PV–EV transition in *bmp15*<sup>-/-</sup> females while the double mutant (*bmp15*<sup>-/-</sup>;*inha*<sup>-/-</sup>) resumed vitellogenic growth to MV stage, not FG stage as seen in *inha*<sup>-/-</sup>. (B) Follicle distribution in different genotypes at 120 dpf. The diameters of *bmp15* mutant follicles could reach the size of PV stage (~250  $\mu$ m), while the double mutant (*bmp15*<sup>-/-</sup>;*inha*<sup>-/-</sup>) follicles could grow beyond PV to reach MV stage (~450  $\mu$ m). (C) Serum levels of E2 in different genotypes at 120 dpf. (D) Serum levels of Vtg in different genotypes. The E2 and Vtg levels were significantly lower in *bmp15*<sup>-/-</sup> females than those in the control, and they were both returned to normal levels in the double mutant (*bmp15*<sup>-/-</sup>;*inha*<sup>-/-</sup>). The values are expressed as mean  $\pm$  SEM (n=5) and analyzed by ANOVA followed by the Tukey HSD for multiple comparisons. Different letters indicate statistical significance ( $P < 0.05$ ).

**Fig. 6 Transcriptome analysis of *bmp15* and *inha*-deficient follicles.** (A) Heatmap of DGEs among four genotypes of *bmp15* and *inha* mutants. The heatmap of *bmp15*<sup>-/-</sup>;*inha*<sup>-/-</sup> showed similar pattern to that of *inha*<sup>-/-</sup> but not *bmp15*<sup>-/-</sup>. Regularized log transformed (rlog) count matrix was generated using DeSeq2 package and the DEGs with significance were used to plot the heatmap of rlog counts. (B) Volcano plot for DEGs of *bmp15*<sup>-/-</sup>, *inha*<sup>-/-</sup> and *bmp15*<sup>-/-</sup>;*inha*<sup>-/-</sup> compared with *bmp15*<sup>+/+</sup>;*inha*<sup>+/+</sup> respectively. Most DEGs in *bmp15*<sup>-/-</sup> follicles were down-regulated whereas most DEGs in *inha*<sup>-/-</sup> and *bmp15*<sup>-/-</sup>;*inha*<sup>-/-</sup> were up-regulated. (C) Graphic illustration of the DEGs from TGF- $\beta$  signaling, endocytosis, receptor-mediated endocytosis pathways.

**Fig. 7 Expression of selected genes at PG and PV stages in *bmp15* mutant.** (A) Stage-matching ovarian samples collected at 60 dpf. Both PG and PV follicles were present in *bmp15*<sup>+/-</sup> and *bmp15*<sup>-/-</sup> ovaries. (B) Expression of selected genes at PG and PV stages in *bmp15*<sup>+/-</sup> and *bmp15*<sup>-/-</sup> fish. The expression of *cyp19a1a* and *inhbaa* were dramatically reduced in PV follicles of *bmp15*<sup>-/-</sup> fish. *cyp19a1a*, ovarian aromatase; *fshr* and *lhcgrr*, FSH and LH receptors; *inhbaa*, *inhbab* and *inhbb*, activin/inhibin  $\beta$  subunits; *inha*, inhibin  $\alpha$  subunit; *fsta* and *fstb*, follistatins. The relative mRNA levels were determined by real-time qPCR, normalized to the housekeeping gene *efla*, and expressed as fold change compared with the levels at the PG stage of the control fish. The values are expressed as mean  $\pm$  SEM (n=5) and analyzed by ANOVA followed by the Tukey HSD for multiple comparisons (\*\*\*  $P < 0.001$ ; n.s., no significance). (C) Levels of E2 and Vtg in the serum of *bmp15*<sup>+/-</sup> and *bmp15*<sup>-/-</sup> females at 120 dpf. The E2 and Vtg contents of *bmp15*<sup>-/-</sup> were both significantly lower than those in the control. The values are expressed as mean  $\pm$  SEM (n=5) and analyzed by t-test (\*\*  $P < 0.01$ ; \*\*\*  $P < 0.001$ ).

**Fig. 8 Rescue of vitellogenic growth in *bmp15*<sup>-/-</sup> females by E2 treatments.** (A) Histology analysis of the *bmp15*<sup>-/-</sup> ovary after E2 treatment. The mutant fish were

1465 treated from 80 to 100 dpf by E2 via water-borne exposure (10 nM) or oral  
administration by feeding (2, 20 and 200  $\mu\text{g/g}$  diet). All five fish fed with E2-containing  
diet at 2  $\mu\text{g/g}$  resumed vitellogenic growth with yolk mass (asterisk) whereas some fish  
at 20  $\mu\text{g/g}$  (3/5) contained vitellogenic follicles. Both water-borne exposure and feeding  
at 200  $\mu\text{g/g}$  suppressed follicle activation or PG-PV transition. The numbers shown in  
each sample indicate total number of fish sampled (lower) and the number of fish that  
showed the same phenotype (upper). (B) Follicle distribution in *bmp15*<sup>-/-</sup> ovary after  
1470 E2 treatments. The mutants could break the blockade at PV stage after treatment with  
E2 at 2 and 20  $\mu\text{g/g}$  diet and their follicles could enter vitellogenic growth to reach the  
size range of EV stage (~ 350  $\mu\text{m}$ ).

**Fig. 9 Effect of fadrozole on vitellogenic growth in *bmp15* and *inha* double mutant.**

1475 (A) Morphology and histology of the double mutant gonads (*bmp15*<sup>-/-</sup>;*inha*<sup>-/-</sup>) after  
fadrozole treatment. The females were reared in 10 L tanks from 80 to 100 dpf with  
dried powder feed containing fadrozole (200  $\mu\text{g/g}$  diet) at 10% (W/W) of fish body  
weight per day. The resumption of follicle development to vitellogenic stage in the  
double mutants was completely abolished by treatment with fadrozole. The numbers  
shown in each sample indicate total number of fish sampled (lower) and the number of  
1480 fish that showed the same phenotype (upper). (B) Expression of *cyp19a1a* in the PG  
follicles and *vtg1* and *vtg3* in the liver at 120 dpf. The relative mRNA levels were  
determined by real-time qPCR, normalized to the housekeeping gene *efla*, and  
expressed as fold change compared with the levels in the control fish. (C) Levels of E2  
and Vtg in the serum of the control and mutants after E2 and fadrozole treatments. The  
1485 values are expressed as mean  $\pm$  SEM ( $n \geq 3$ ) and analyzed by ANOVA followed by the  
Tukey HSD for multiple comparisons. Different letters indicate statistical significance  
( $P < 0.05$ ).

**Fig. 10 Role of *inhbaa* in the rescue of vitellogenic growth in *bmp15*<sup>-/-</sup> by *inha*<sup>-/-</sup>.**

1490 (A) Morphology and histology of the gonads in different genotypes at 120 dpf. The  
asterisk shows vitellogenic follicles without yolk mass in the triple mutant (*bmp15*<sup>-/-</sup>;  
*inha*<sup>-/-</sup>;*inhbaa*<sup>-/-</sup>). (B) Oocytes from different genotypes at higher magnification.  
The oocytes in *bmp15*<sup>-/-</sup> single mutant were arrested at PV stage with cortical alveoli  
(CA) but no yolk granules (YG). The double mutant with *inha*<sup>-/-</sup> showed normal  
vitellogenic growth beyond PV stage with both CA and YG, while the lack of *inhbaa*  
1495 in the triple mutant blocked YG accumulation again in the oocytes. The double arrowed  
bar shows the region of clear cytosol between the germinal vesicle (GV) and CA zone  
where the YG is supposed to be located. (C) Follicle distribution in the ovary of  
different genotypes. The follicles could grow to the size range of PV (~250  $\mu\text{m}$ ), MV  
(~450  $\mu\text{m}$ ) and EV stage (~350  $\mu\text{m}$ ) in the single (*bmp15*<sup>-/-</sup>), double (*bmp15*<sup>-/-</sup>;*inha*<sup>-/-</sup>)  
1500 and triple mutant (*bmp15*<sup>-/-</sup>;*inha*<sup>-/-</sup>;*inhbaa*<sup>-/-</sup>), respectively. (D) GSI of females in  
different genotypes at 120 dpf. The values are expressed as mean  $\pm$  SEM ( $n \geq 5$ ) and  
analyzed by ANOVA followed by the Tukey HSD for multiple comparisons. Different  
letters indicate statistical significance ( $P < 0.05$ ). (E and F) Serum levels of E2 and Vtg  
in different genotypes at 120 dpf ( $n = 5$ ). The normal concentrations of E2 and Vtg in  
1505 the double mutants decreased again by the loss of *inhbaa* in the triple mutants. The  
values are expressed as mean  $\pm$  SEM and analyzed by ANOVA followed by the Tukey  
HSD for multiple comparisons. Different letters indicate statistical significance ( $P <$   
0.05). (G) Fertility test of different genotypes at 120 dpf. Five female fish from each  
1510 type were tested 10 times with normal WT males by natural breeding. The number of  
fertilized eggs was counted and analyzed after each breeding. The *inha* mutant females

were sub-fertile with much lower fecundity than the control, while other genotypes of the mutant females were all infertile. (H) Sex ratios of different genotypes at 120 dpf. The double mutant and triple mutant females could maintain sexuality with sex ratio being around 50:50 (♂: ♀), whereas sex reversal occurred in *bmp15*<sup>-/-</sup> fish. I-IV, stages of sex reversal; \*\*\* P < 0.001 by Chi-squared test compared with the control.

**Fig. 11 Expression of selected genes in different genotypes at 120 dpf.** (A) Expression of ovarian genes in the PG follicles (*cyp19a1a*, *fshr*, *inhbaa*, *lrp1aa* and *lrp2a*). (B) Expression of Vtg genes in the liver (*vtg1-7*). (C) Expression of estrogen receptors in the liver (*esr1*, *esr2a* and *esr2b*). (D) Expression of gonadotropins in the pituitary (*fshb* and *lhb*). The relative mRNA levels were determined by real-time qPCR, normalized to the housekeeping gene *ef1a* and presented as the fold change compared with the control fish. Color intensity indicates the mRNA levels (n ≥ 3) and analyzed by ANOVA followed by the Tukey HSD for multiple comparisons (\* P < 0.05; \*\* P < 0.01; \*\*\* P < 0.001). (E) In situ hybridization on the expression of *fshb* (red) and *lhb* (green) in the pituitary of different genotypes. DAPI stains for nuclei (blue).

**Fig. 12 Interaction of *bmp15* and *gdf9* in zebrafish follicle development.** (A) Histological analysis of *bmp15* and *gdf9* single and double mutants at 90 dpf. The follicles of some double mutants (*gdf9*<sup>-/-</sup>;*bmp15*<sup>-/-</sup>) could overcome the blockade at PG to enter early PV (PV-I) stage. (B) Rescue of vitellogenic growth in *bmp15* and *gdf9* single and double mutants by *inha*<sup>-/-</sup>. (C) Follicle distribution in different genotypes. Simultaneous mutation of *inha*<sup>-/-</sup> could rescue the follicle growth in both *bmp15*<sup>-/-</sup> and *gdf9*<sup>-/-</sup> to MV stage; however, further loss of *inhbaa* reduced it to EV stage. (D) Follicle composition in different genotypes and the data are shown as mean ± SEM (n = 3). Statistical analysis was performed with ANOVA followed by Tukey HSD for comparison with corresponding stages in the control fish (\* P < 0.05; \*\* P < 0.01; \*\*\* P < 0.001). The proportion of PV-I follicles was significantly higher in the double mutant (*gdf9*<sup>-/-</sup>;*bmp15*<sup>-/-</sup>) than others especially *gdf9*<sup>-/-</sup> single mutant. The proportion of follicles at EV-FG stage (stage III) was lower in the triple mutants than the double mutant (*gdf9*<sup>-/-</sup>;*bmp15*<sup>-/-</sup>).

**Fig. 13 Summary of genetic analysis and working hypotheses on mechanisms of Bmp15 action in zebrafish.** (A) Zebrafish folliculogenesis and phenotypic defects of single (*bmp15*<sup>-/-</sup>), double (*bmp15*<sup>-/-</sup>;*inha*<sup>-/-</sup>) and triple (*bmp15*<sup>-/-</sup>;*inha*<sup>-/-</sup>;*inhbaa*<sup>-/-</sup>) mutants. *Bmp15* deficiency caused a complete arrest of follicle development at PV stage with cortical alveoli but no yolk mass in the oocyte followed by sex reversal to males. Double mutation with *inha* (*bmp15*<sup>-/-</sup>;*inha*<sup>-/-</sup>) prevented sex reversal and rescued the vitellogenic growth with yolk mass to MV stage. Further knockout of *inhbaa* in the triple mutant (*bmp15*<sup>-/-</sup>;*inha*<sup>-/-</sup>;*inhbaa*<sup>-/-</sup>) resulted in the loss of yolk granules again but allowed the oocytes to grow to EV size. (B) Roles of Gdf9 and Bmp15 in controlling early follicle development in zebrafish. Gdf9 is primarily involved in controlling PG-PV transition or follicle activation as a determinant; in contrast, Bmp15 is a key factor controlling PV-EV transition, the subsequent stage that marks the start of vitellogenic growth. Bmp15 is also involved in promoting PG-PV transition as an accelerator. (C) Actions and interactions of Bmp15 from the oocyte, activin/inhibin from the follicle cells and FSH from the pituitary in controlling aromatase (*cyp19a1a*) expression and Vtg biosynthesis as well as uptake. (D) Potential roles for Bmp15 and Gdf9 in regulating formation of cortical alveoli and yolk granules. Gdf9 may stimulate the

biogenesis of cortical alveoli in the oocyte, while Bmp15 may play an antagonistic role in this regard while promoting yolk formation.

1560 **Fig. S1 Mutagenesis of *bmp15* and mutant characterization.** (A) Schematic  
illustration of the genomic structure of zebrafish *bmp15* gene. The underlined sequence  
indicates CRISPR/Cas9 target site, and the dashed line indicates the deleted sequence  
(-5 bp) of zebrafish *bmp15*. The primers for mutation screening  
(*bmp15\_5284\_F/bmp15\_5285\_R*) are shown below. (B) Schematic representation of  
1565 Bmp15 amino acid (aa) sequence. The 5-bp deletion introduced a premature  
termination codon, resulting in the synthesis of a truncated protein of 55 aa. (C)  
Confirmation of mutation at the mRNA level in the ovary. RT-PCR was performed on  
total RNA extracted from WT, heterozygous and homozygous mutant ovaries with a  
specific primer (*bmp15\_6481\_F/bmp15\_5285\_R*) overlapping with the deleted  
sequence. No signal could be detected in the mutant ovary. (D) Genotyping with  
1570 HRMA. Melt curves for WT, heterozygotes and homozygous mutant are marked in  
black, green, and red respectively. (E) Genotyping with HMA. The heterozygotes  
showed two additional bands and the homozygous mutant showed a smaller band than  
WT.

1575 **Fig. S2 Histogram of the top enriched GO terms for up-regulated and down-  
regulated DEGs in *bmp15* and *inha* mutants.** GO terms include three parts: biological  
process (BP), cellular component (CC) and molecular function (MF).

1580 **Fig. S3 Testis development and spermatogenesis in *bmp15*, *inha*, and *inhbaa*  
mutant males.** (A) Morphology, gross anatomy, and histological analysis of sexually  
mature males at 180 dpf. The boxed areas are shown at higher magnification below. (B)  
Area of the spermatozoa-filled luminal spaces in the testis. There was no significant  
difference among these mutants compared with the control. The values are expressed  
as mean  $\pm$  SEM (n=5) and analyzed by ANOVA followed by the Tukey HSD for  
multiple comparisons.

1585

1590

1595

**Table S1. Primer used for CRISPR, HRMA and RT-PCR.**

| Gene            | Primer ID | Primer Sequence              | Application |
|-----------------|-----------|------------------------------|-------------|
| <i>bmp15</i>    | 4130      | TAGGCGACGCCAAAATGTGACG       | CRISPR      |
| <i>bmp15</i>    | 4131      | AAACCGTCACATTTTGGCGTCG       | CRISPR      |
| <i>bmp15</i>    | 5284      | ACTCTGCGTACTGTCTGTTT         | HRMA        |
| <i>bmp15</i>    | 5285      | ACGGGAGGTCTAAAATGAGGGT       | HRMA        |
| <i>gdf9</i>     | 1670      | ATTATGGCGACGCTGTTTTT         | HRMA        |
| <i>gdf9</i>     | 1671      | CGTTTTCAAAGTTGTAGCTTGATG     | HRMA        |
| <i>inha</i>     | 1676      | TTTTCTCCTCCATCGGTTCA         | HRMA        |
| <i>inha</i>     | 1677      | CATCCAACCCCAAACCTTC          | HRMA        |
| <i>inhbaa</i>   | 4136      | ATGTCCCCTCTGCCTCTACT         | HRMA        |
| <i>inhbaa</i>   | 4137      | AGGCTCCCTTTGGTGACCAT         | HRMA        |
| <i>fshb</i>     | 5836      | CAGATGAGGATGCGTGTGC          | RT-PCR      |
| <i>fshb</i>     | 5837      | ACCCCTGCAGGACAGCC            | RT-PCR      |
| <i>lhb</i>      | 983       | ATGTTATTGGCTGGAAATGG         | RT-PCR      |
| <i>lhb</i>      | 984       | CTAGTATGCGGGGAAATCC          | RT-PCR      |
| <i>fshr</i>     | 957       | AACATGCACATAGAGAGGATTCCCAG   | RT-PCR      |
| <i>fshr</i>     | 958       | GCTCAGTAAACAGCTCCAGGC        | RT-PCR      |
| <i>lhcgr</i>    | 954       | TGAATACGCCACAATGAATCTCTT     | RT-PCR      |
| <i>lhcgr</i>    | 955       | ATGACGATCCAATGACATCTGACTC    | RT-PCR      |
| <i>efla</i>     | 728       | GGCTGACTGTGCTGTGCTGATTG      | RT-PCR      |
| <i>efla</i>     | 729       | CTTGTCGGTGGGACGGCTAGG        | RT-PCR      |
| <i>cyp19ala</i> | 818       | TGTGCGTGTCTGGATCAATGG        | RT-PCR      |
| <i>cyp19ala</i> | 819       | AAGCCCTGGACCTGTGAGAG         | RT-PCR      |
| <i>esr1</i>     | 1220      | GTCTCAAAGCCATCATACTCATCAATTC | RT-PCR      |
| <i>esr1</i>     | 1221      | TTCATTCGGTATAAGTGCTCCATTCC   | RT-PCR      |
| <i>esr2a</i>    | 1226      | CGACTTCAACAGAACCATGCTACTAG   | RT-PCR      |
| <i>esr2a</i>    | 1227      | CTTCACACGACCACACTCCATAATG    | RT-PCR      |
| <i>esr2b</i>    | 1230      | CAGTCCCTCTCAGCACCTCTTTC      | RT-PCR      |
| <i>esr2b</i>    | 1231      | TATCCAGCCAGCAGCATTCCAG       | RT-PCR      |
| <i>vtg1</i>     | 4009      | CTGCGTGAAGTTGTCATGCT         | RT-PCR      |
| <i>vtg1</i>     | 4010      | GACCAGCATTGCCATAACT          | RT-PCR      |
| <i>vtg2</i>     | 6998      | GGACTGGCCAAAGCAGGTAT         | RT-PCR      |
| <i>vtg2</i>     | 6999      | CCAAGTGCCAGCATACTCGT         | RT-PCR      |
| <i>vtg3</i>     | 4393      | AACTGCCACACCTGGTTGAA         | RT-PCR      |
| <i>vtg3</i>     | 4394      | TGATCTCGGCAGACAGATGC         | RT-PCR      |
| <i>vtg4</i>     | 7000      | TCAGTGCCGTGACTGAGAAC         | RT-PCR      |
| <i>vtg4</i>     | 7001      | GATCTGAAGCTGAGCAGCCA         | RT-PCR      |
| <i>vtg5</i>     | 7002      | GCTCTGCTTTTGGGAGGTCT         | RT-PCR      |
| <i>vtg5</i>     | 7003      | CCAAGTGCCAGCATACTCGT         | RT-PCR      |
| <i>vtg7</i>     | 7004      | CAGCAGCAAGGTTCTCCTCA         | RT-PCR      |
| <i>vtg7</i>     | 7005      | CCAAGTGCCAGCATACTCGT         | RT-PCR      |

|               |      |                         |        |
|---------------|------|-------------------------|--------|
| <i>lrp1ab</i> | 7006 | TGTCCAGACGGCTCTGATGA    | RT-PCR |
| <i>lrp1ab</i> | 7007 | CACATCCGTTCTCGACACT     | RT-PCR |
| <i>lrp2a</i>  | 7008 | GGATTTTCCGTTGCGGGAC     | RT-PCR |
| <i>lrp2a</i>  | 7009 | TCAAGCACTGGAAGTGGAGCG   | RT-PCR |
| <i>lrp5</i>   | 7010 | GAGCGCTTGCGATGGAGATT    | RT-PCR |
| <i>lrp5</i>   | 7011 | ACTGCAGACTCTGAGCGACC    | RT-PCR |
| <i>lrp6</i>   | 7012 | GTGGAAGGATCTGGACAGCC    | RT-PCR |
| <i>lrp6</i>   | 7013 | CATCGCTGCACGGTCTATCT    | RT-PCR |
| <i>gdf9</i>   | 206  | GAGTCTGTTGAACCCGACG     | RT-PCR |
| <i>gdf9</i>   | 207  | GCAGGTGGATGTCCTTCTTA    | RT-PCR |
| <i>inha</i>   | 520  | AGCCTCCTCTGCCAGTGTTG    | RT-PCR |
| <i>inha</i>   | 521  | ATGTTGATGGAAGCGATGGTCTC | RT-PCR |
| <i>inhbaa</i> | 929  | GACCGAACAGGCAGAACAG     | RT-PCR |
| <i>inhbaa</i> | 930  | GTCCACCACAGACATCTCACC   | RT-PCR |
| <i>inhbab</i> | 1063 | ACGGCACAGTGGAGATGG      | RT-PCR |
| <i>inhbab</i> | 1064 | CAGGACATCAGGGGCATC      | RT-PCR |
| <i>inhbb</i>  | 6109 | GCGGGTAAAGTTAGGGAG      | RT-PCR |
| <i>inhbb</i>  | 6110 | AGAGGCTGGACTTGGATG      | RT-PCR |
| <i>fsta</i>   | 6101 | TTTTATTACTCTTTTGGCTCTG  | RT-PCR |
| <i>fsta</i>   | 6102 | CATTCCTCCCGACTCATC      | RT-PCR |
| <i>fstb</i>   | 6103 | ACTTGATGGAGGAGCAGAA     | RT-PCR |
| <i>fstb</i>   | 6104 | GTACCCAAACGACCACTTT     | RT-PCR |
| <i>vtg6</i>   | 3991 | AAGTCAGCAGCAAGGTTTCGT   | RT-PCR |
| <i>vtg6</i>   | 3992 | AGGTGAGCTTAGTGGCAGGA    | RT-PCR |
| <i>bmp15</i>  | 6300 | TGGGTCCAACACCATAAGACTG  | RT-PCR |
| <i>bmp15</i>  | 6301 | GACGCCTTCACCAGTTTGTC    | RT-PCR |
| <i>bmp15</i>  | 6481 | CATGGCCTCCCCGTCACATT    | RT-PCR |
| <i>bmpr2a</i> | 4389 | ACCGCCAGCAGTTCACTAATG   | RT-PCR |
| <i>bmpr2a</i> | 4390 | TCCGTCTTAACCAGCACATTCC  | RT-PCR |
| <i>bmpr2b</i> | 4391 | GGCTCTGCTCACTGCTTCTG    | RT-PCR |
| <i>bmpr2b</i> | 4392 | TGCGATGGCGTTGTGGTAAC    | RT-PCR |

1600

1605

1610

**Figure 1**

1615

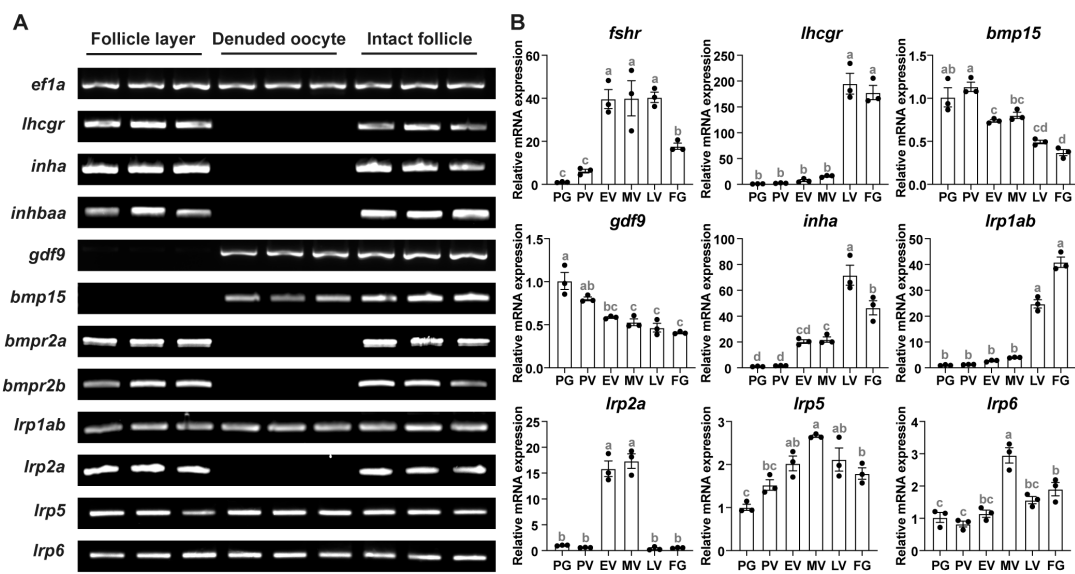

1620

1625

1630

1635

**Figure 2**

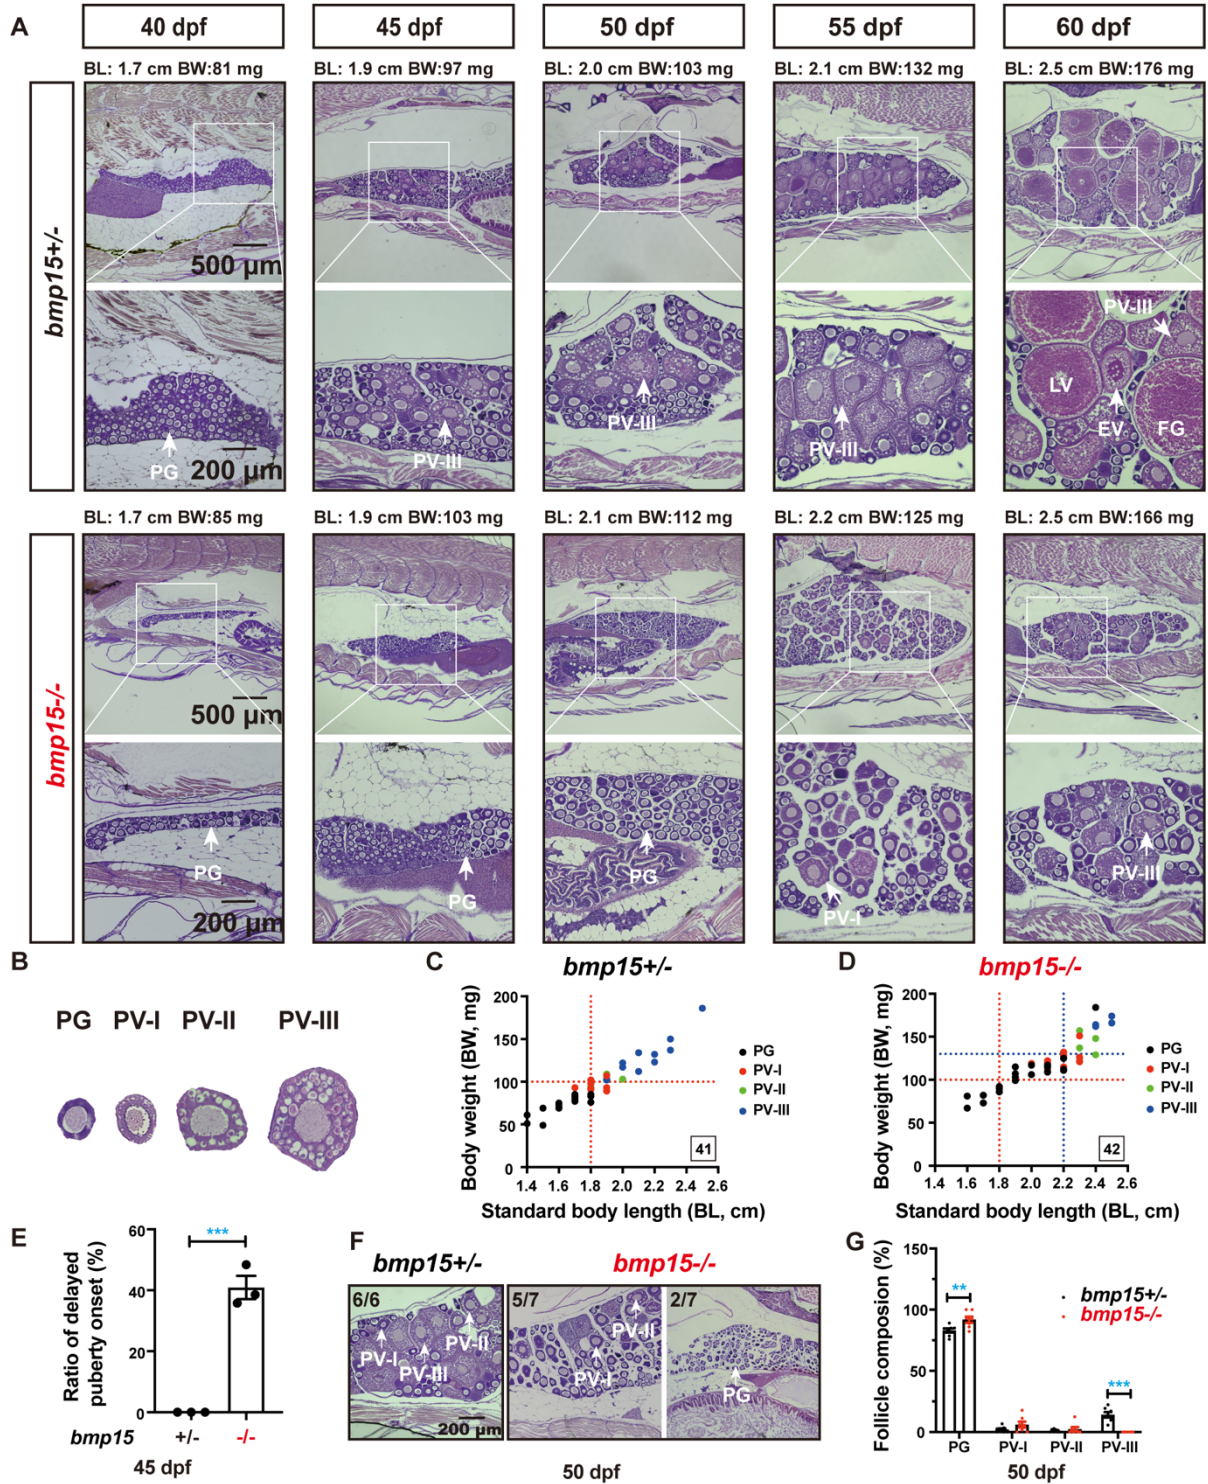

1640



**Figure 3**

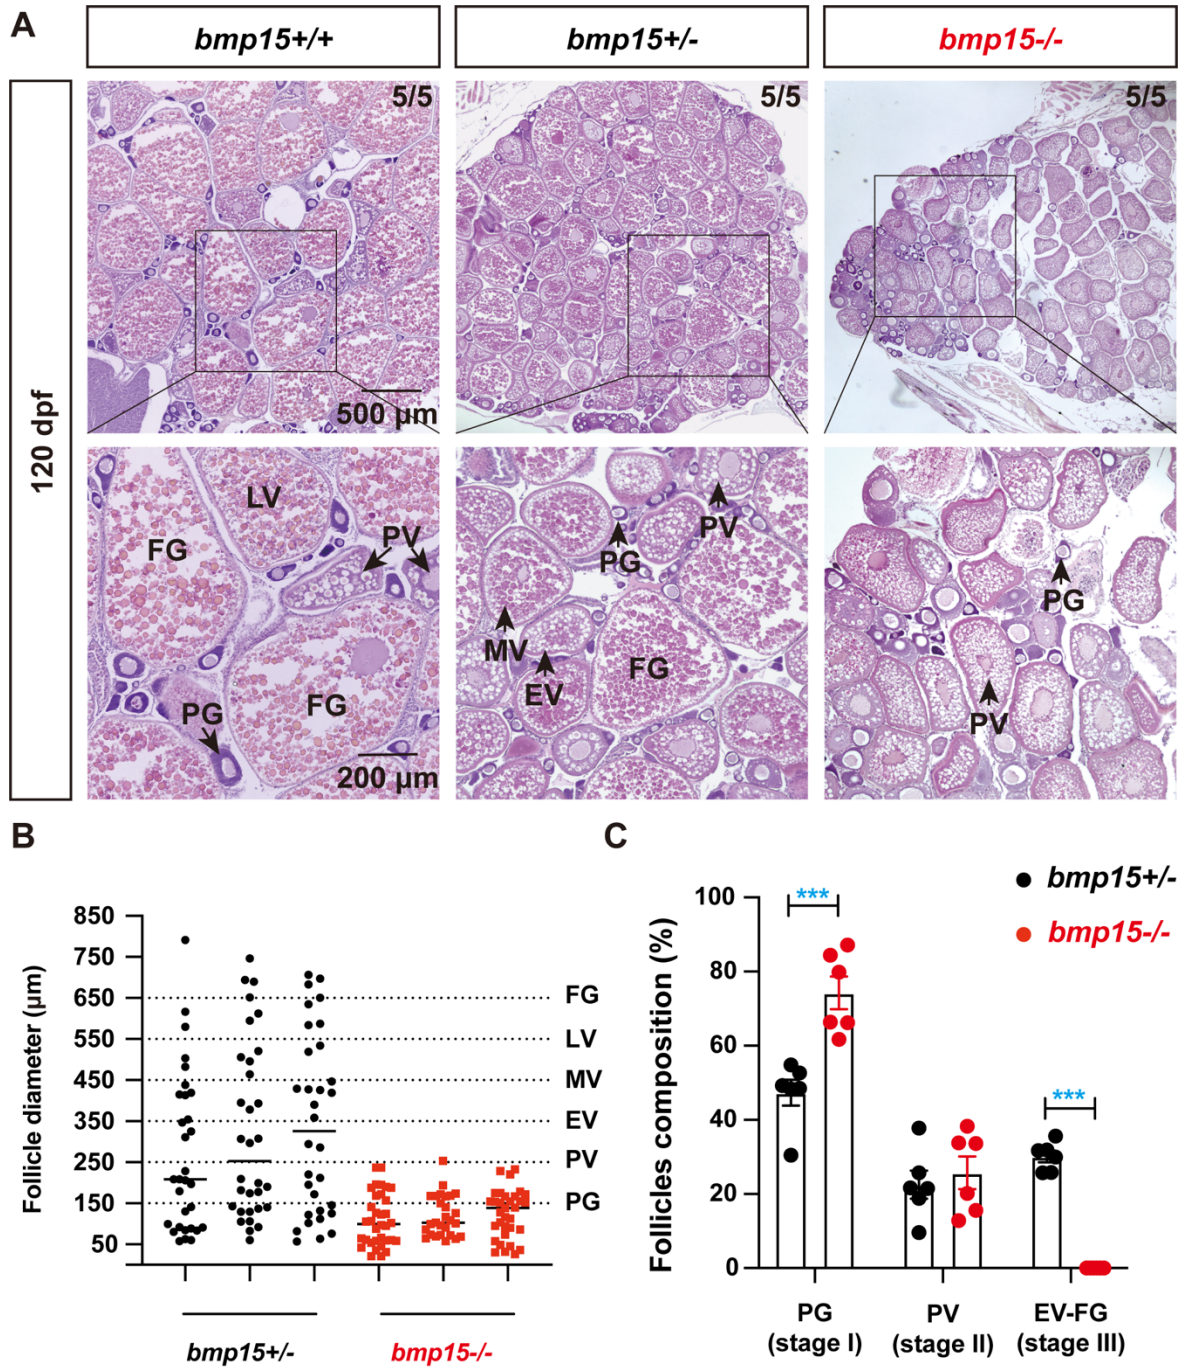

1645

1650

**Figure 4**

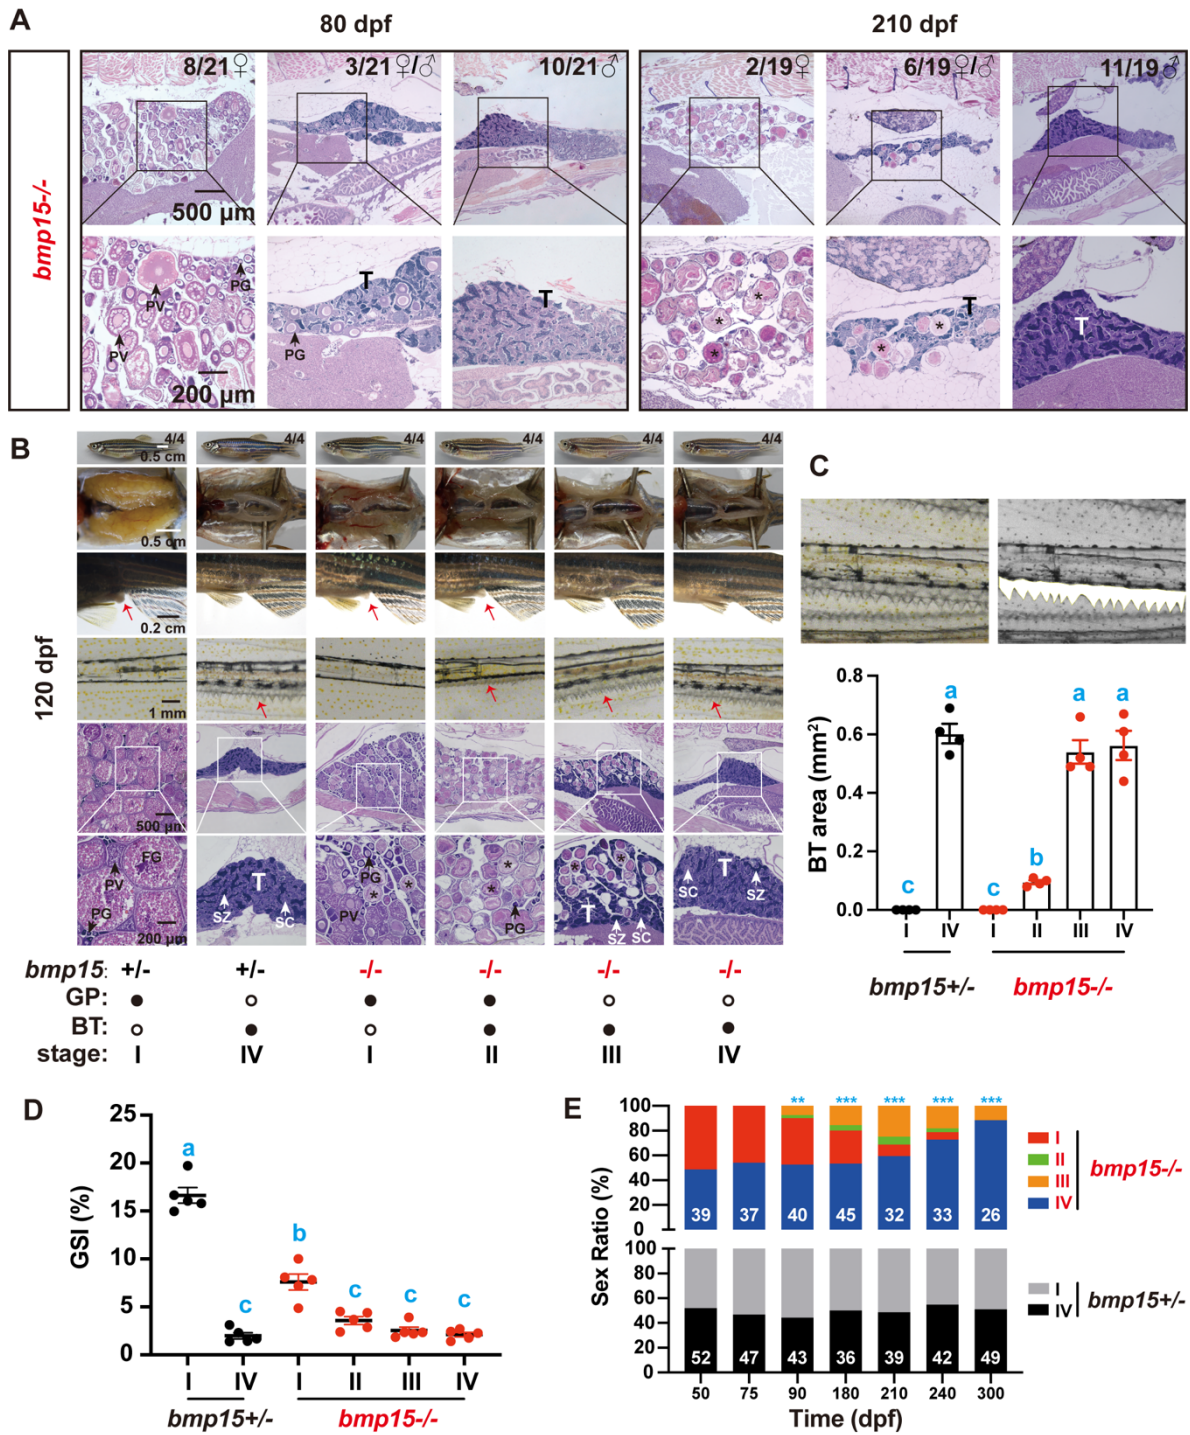

1655

1660 **Figure 5**

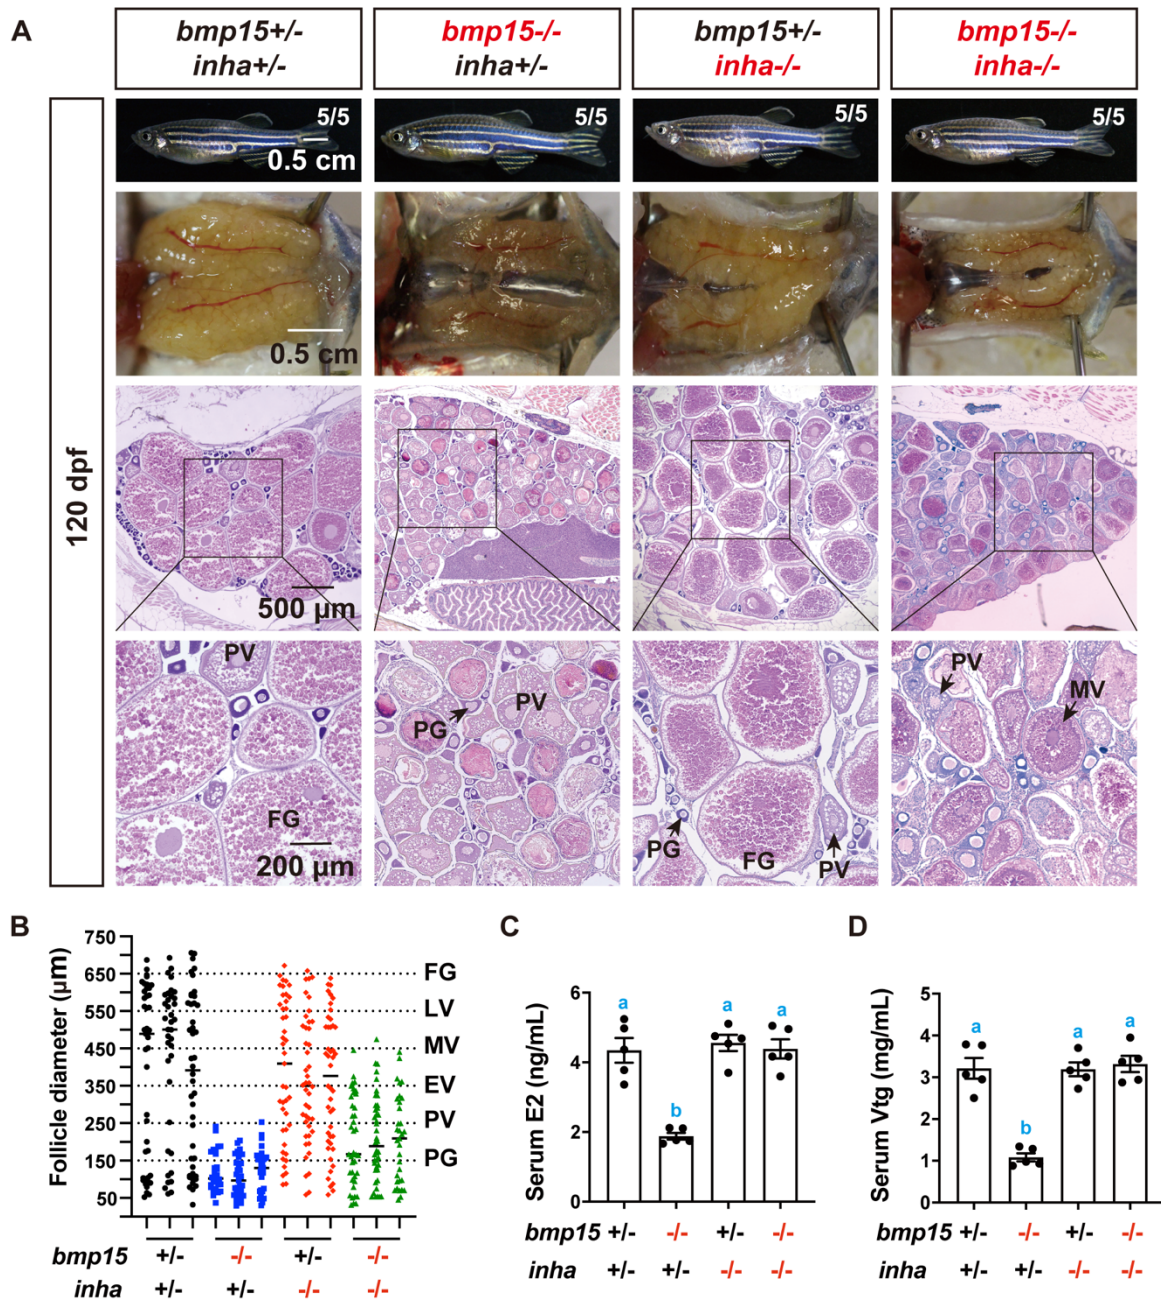

1665

1670

**Figure 6**

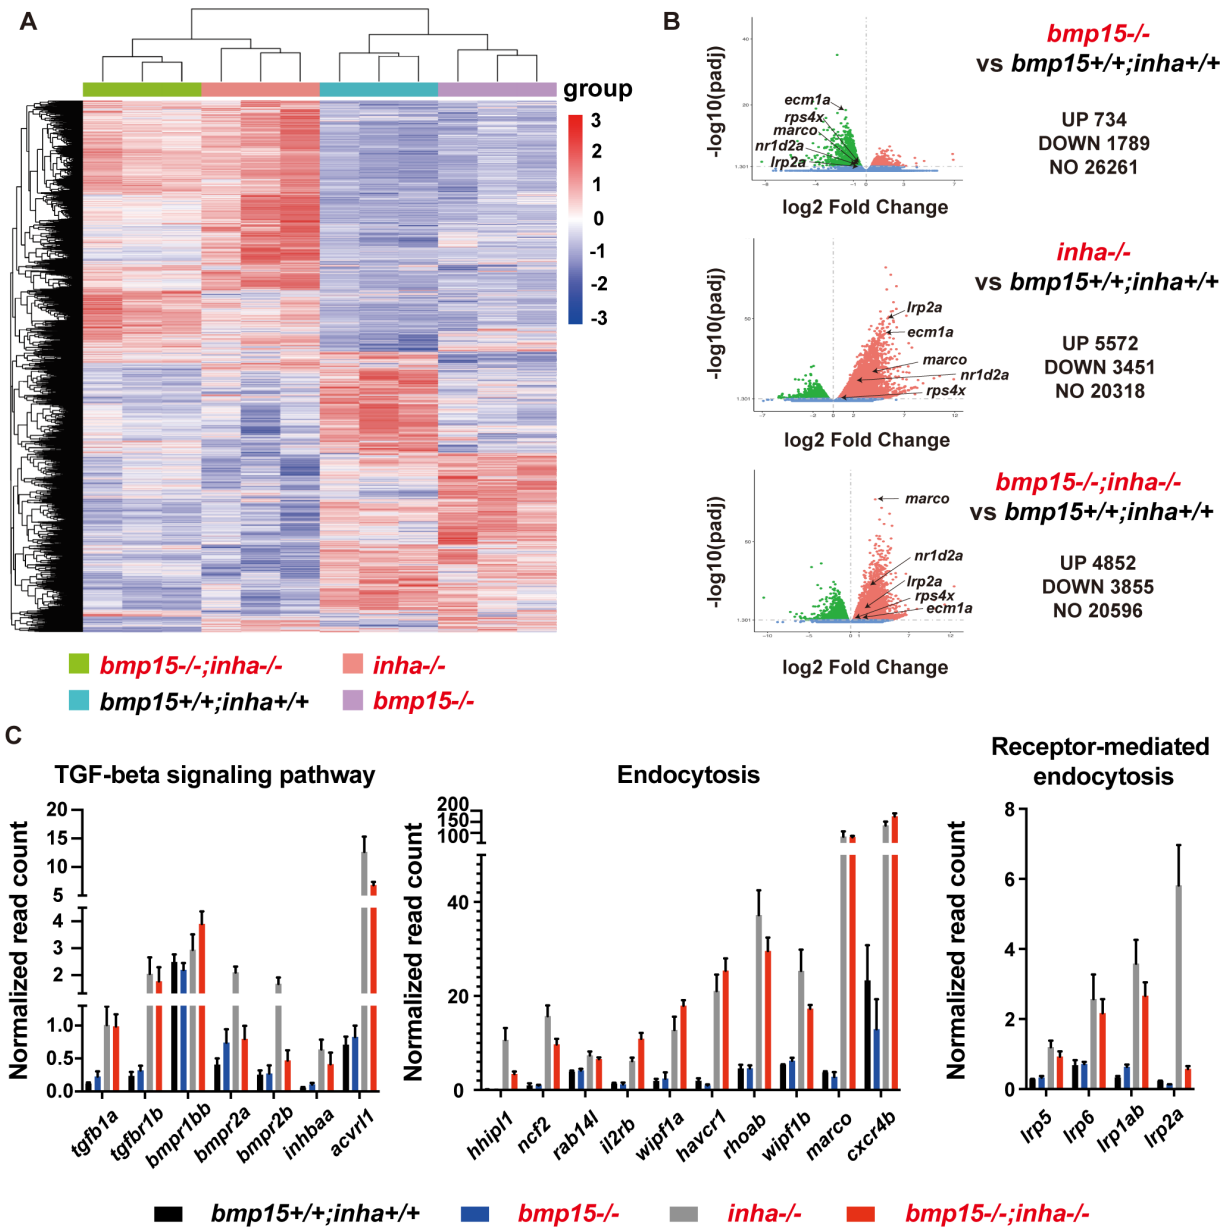

1675

1680

1685

Figure 7

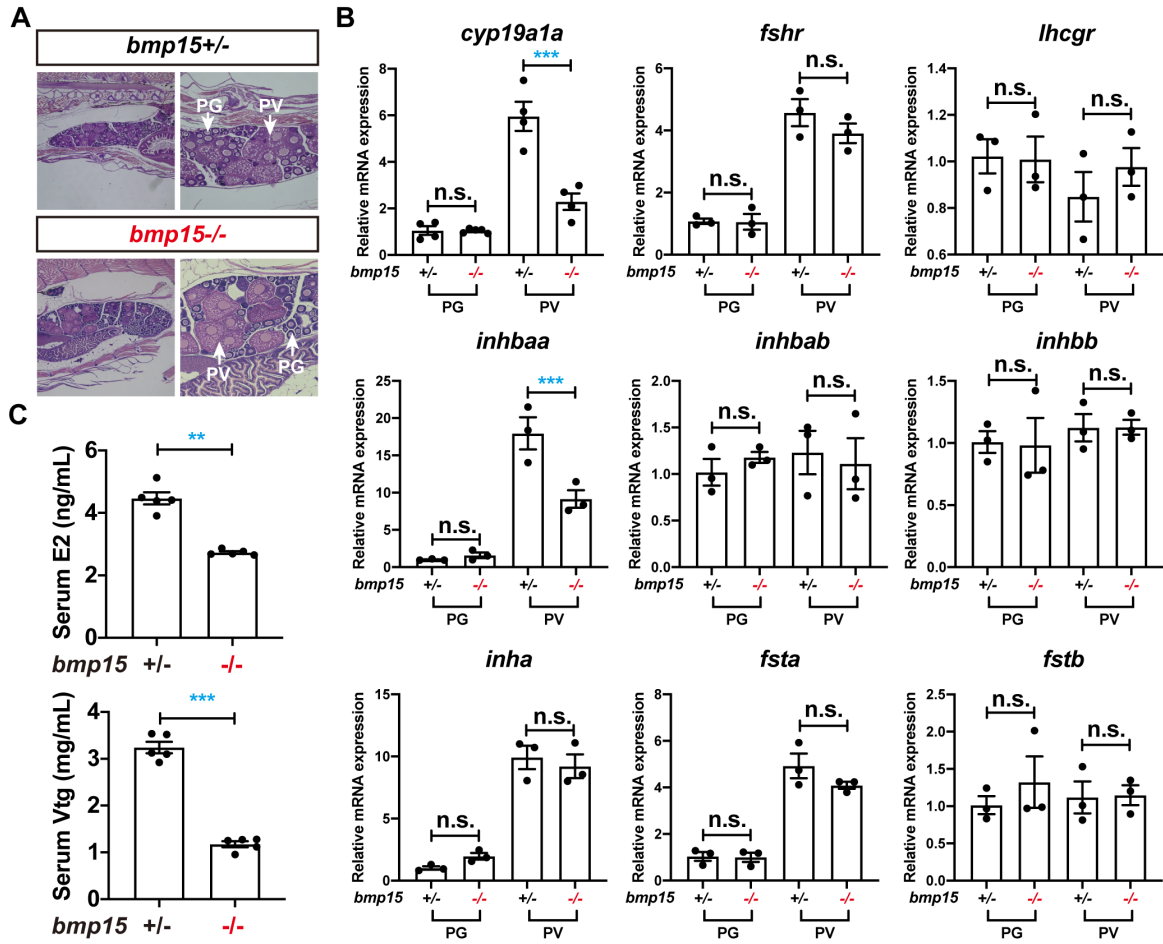

1690

1695

1700

1705

**Figure 8**

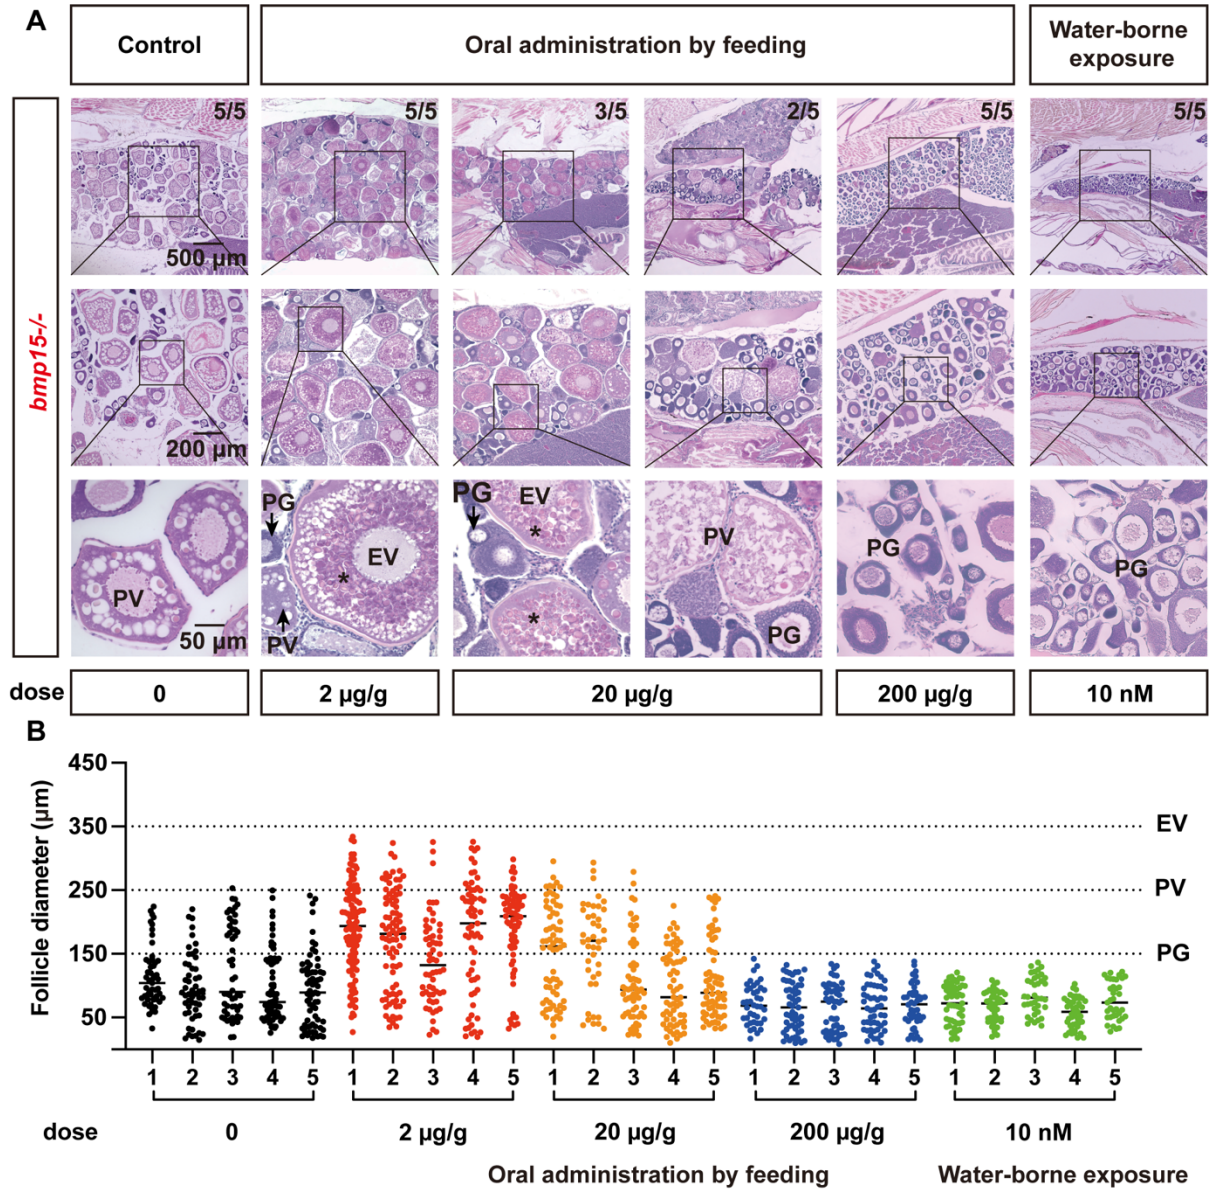

1710

1715

1720

**Figure 9**

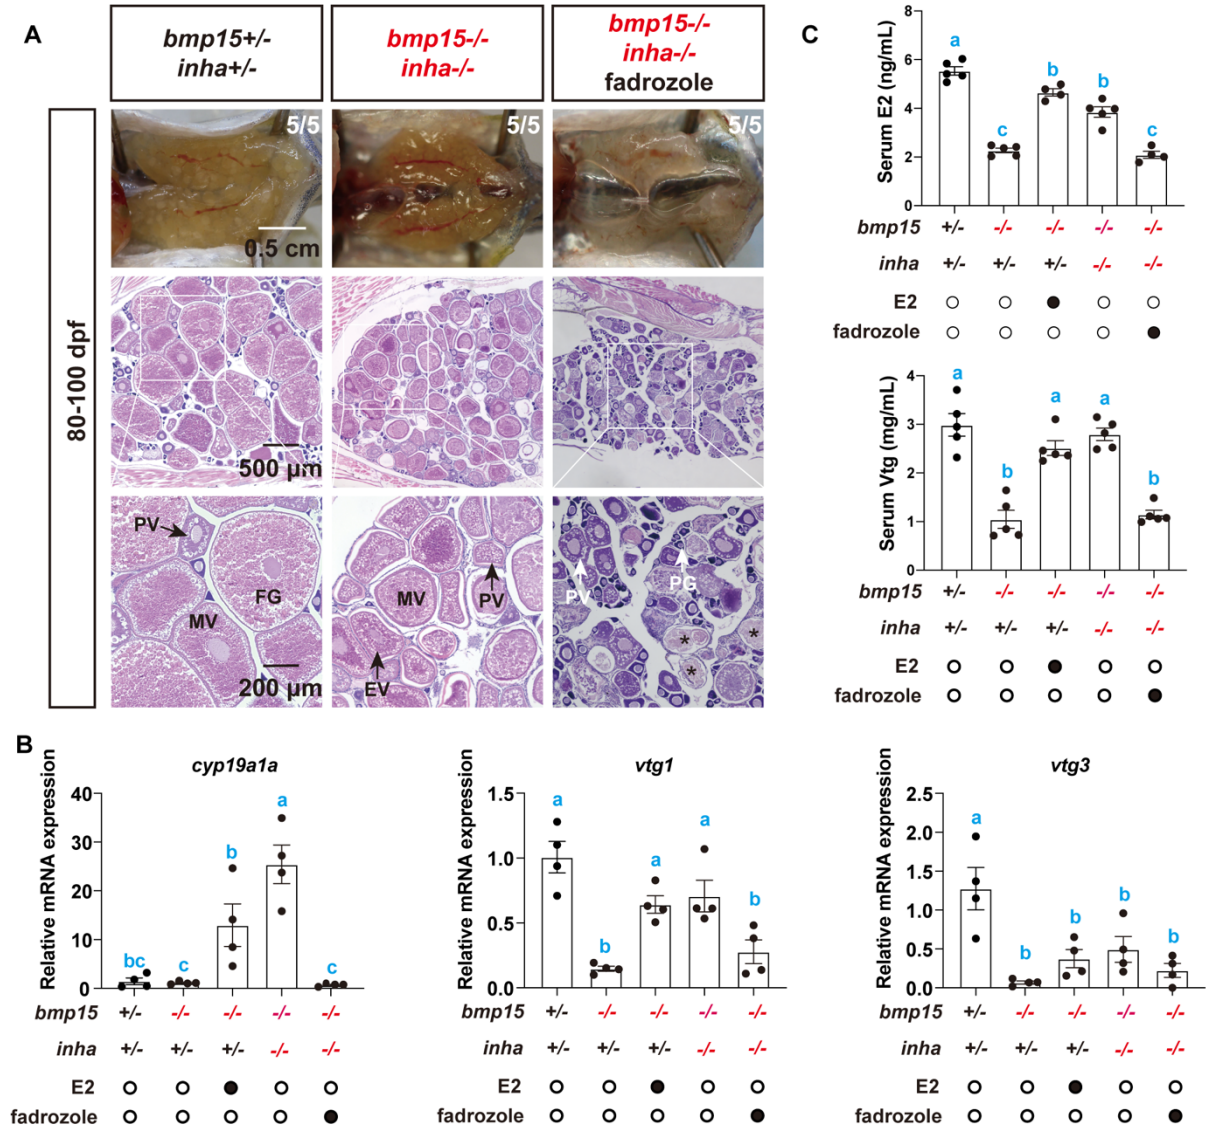

1725

1730

1735

**Figure 10**

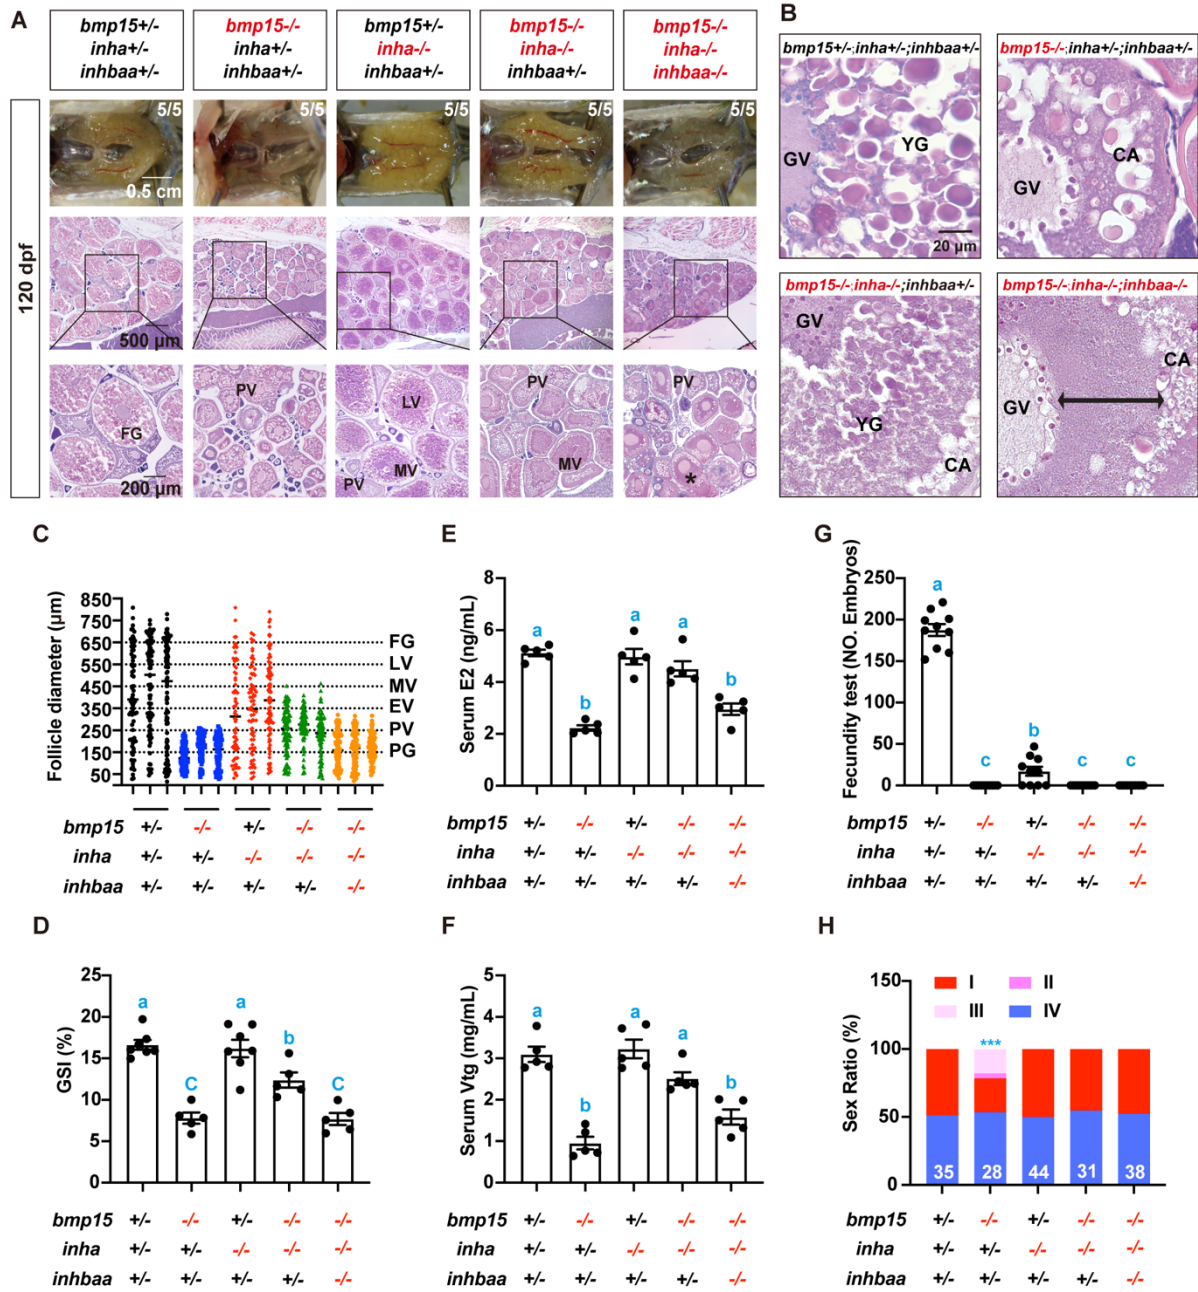

1740

1745



Figure 11

1750

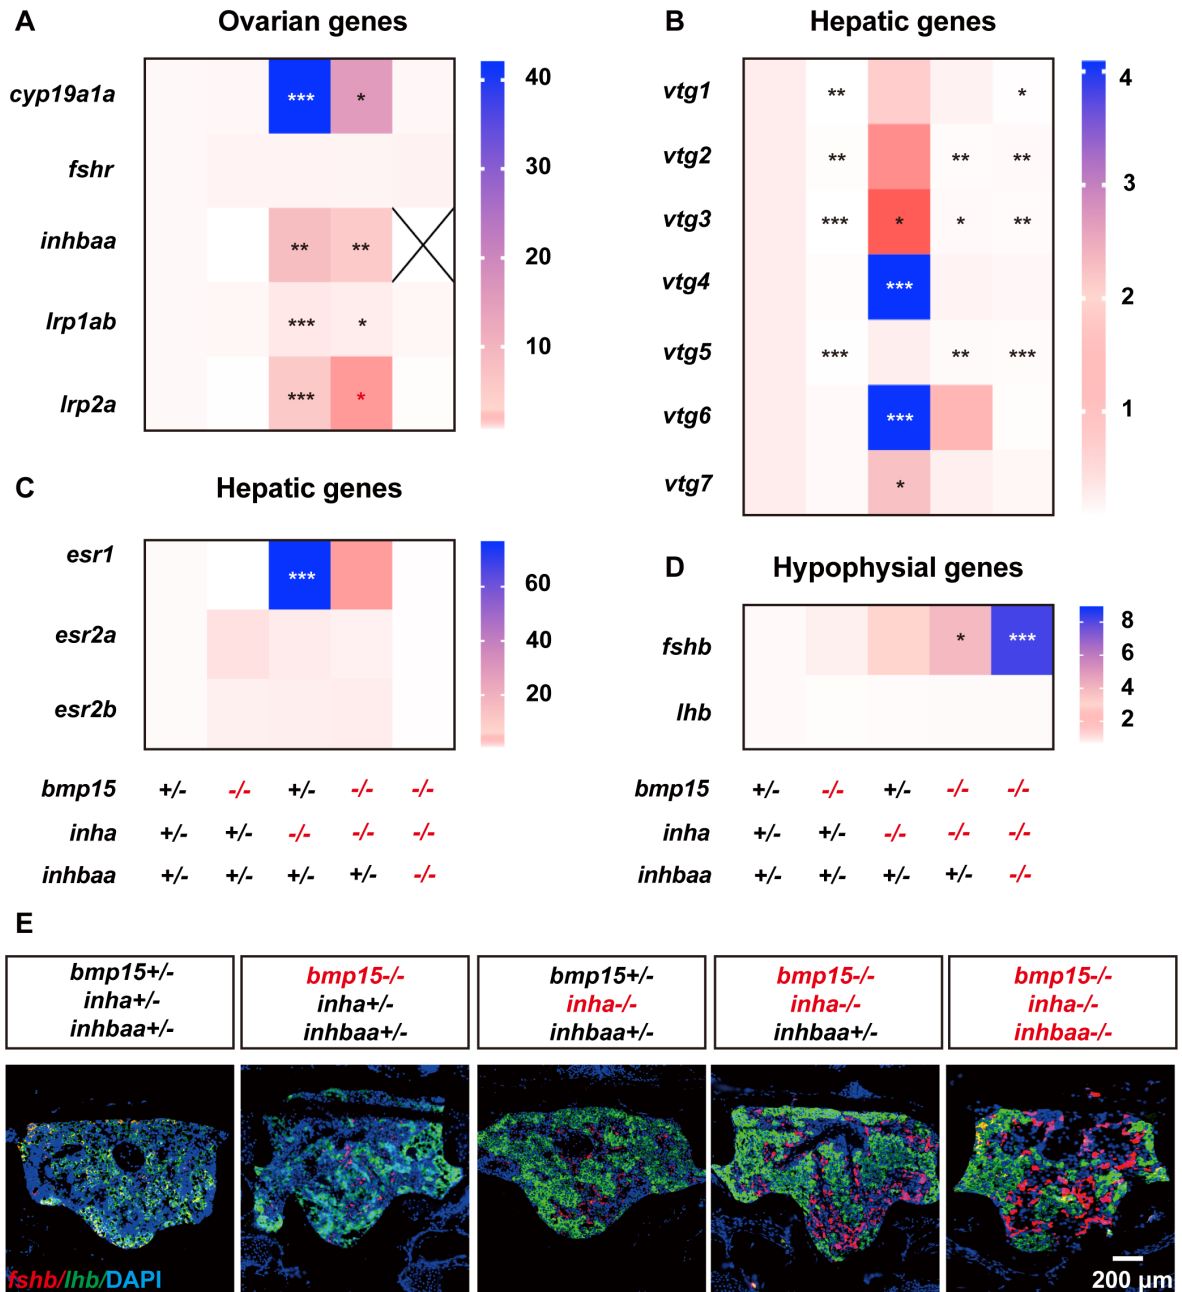

1755

1760 **Figure 12**

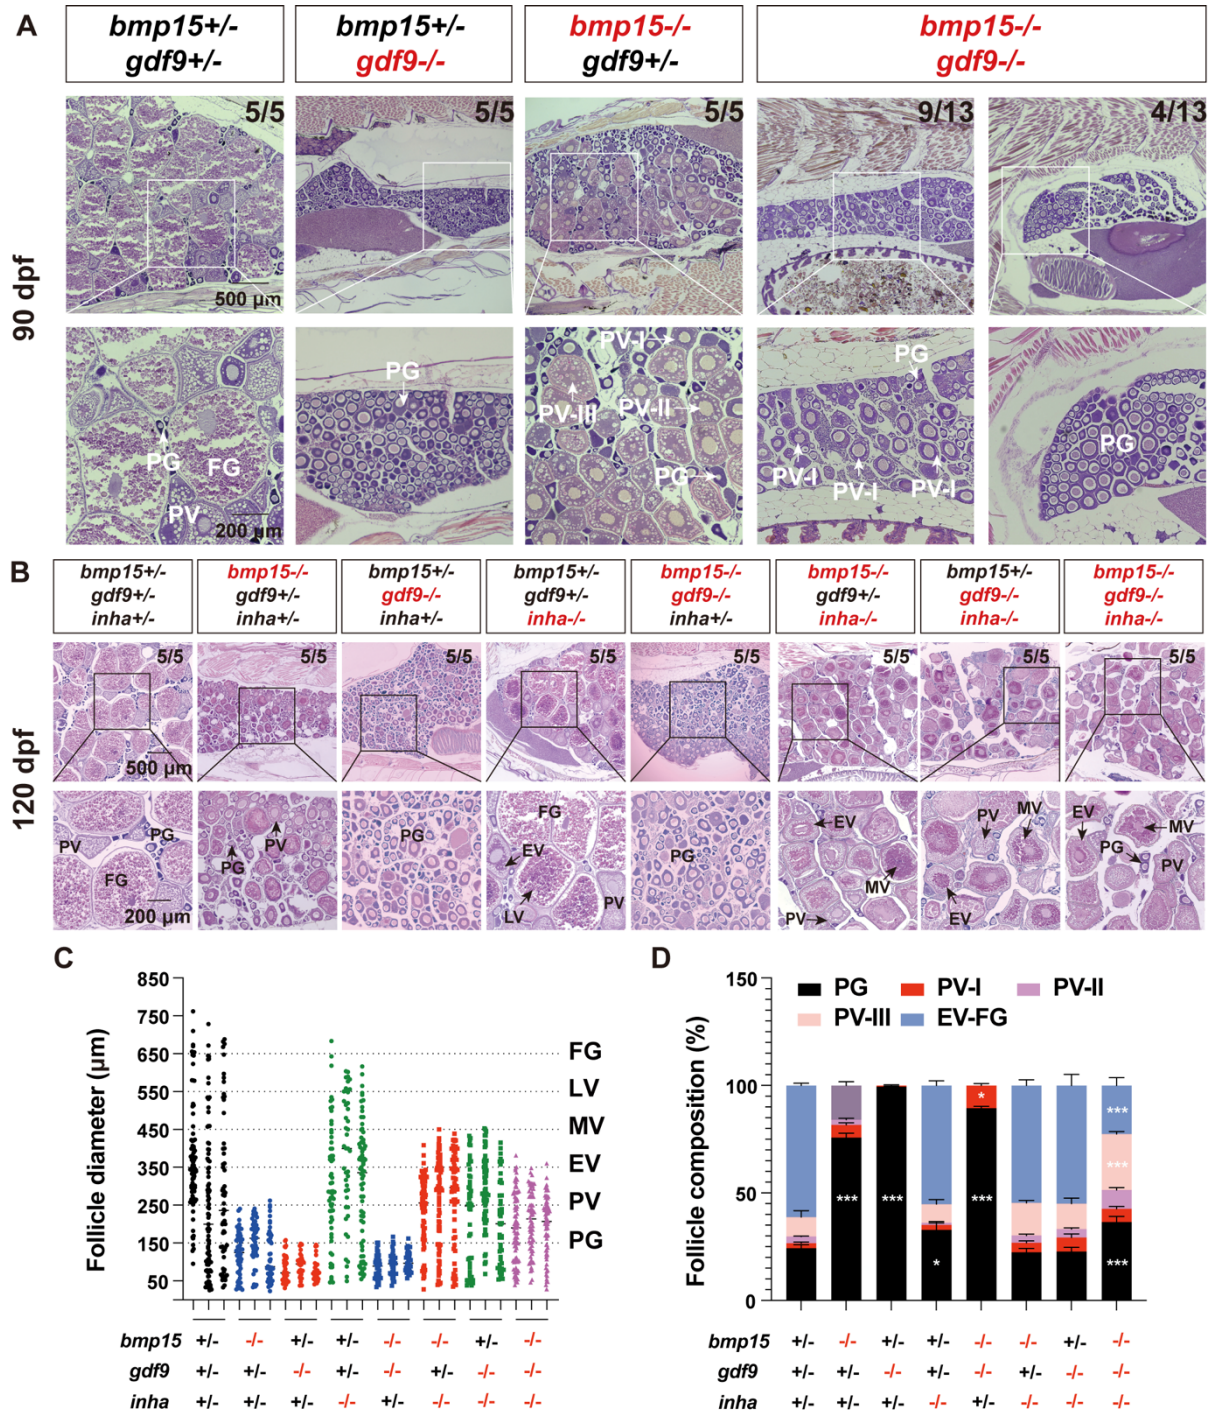

1765

Figure 13

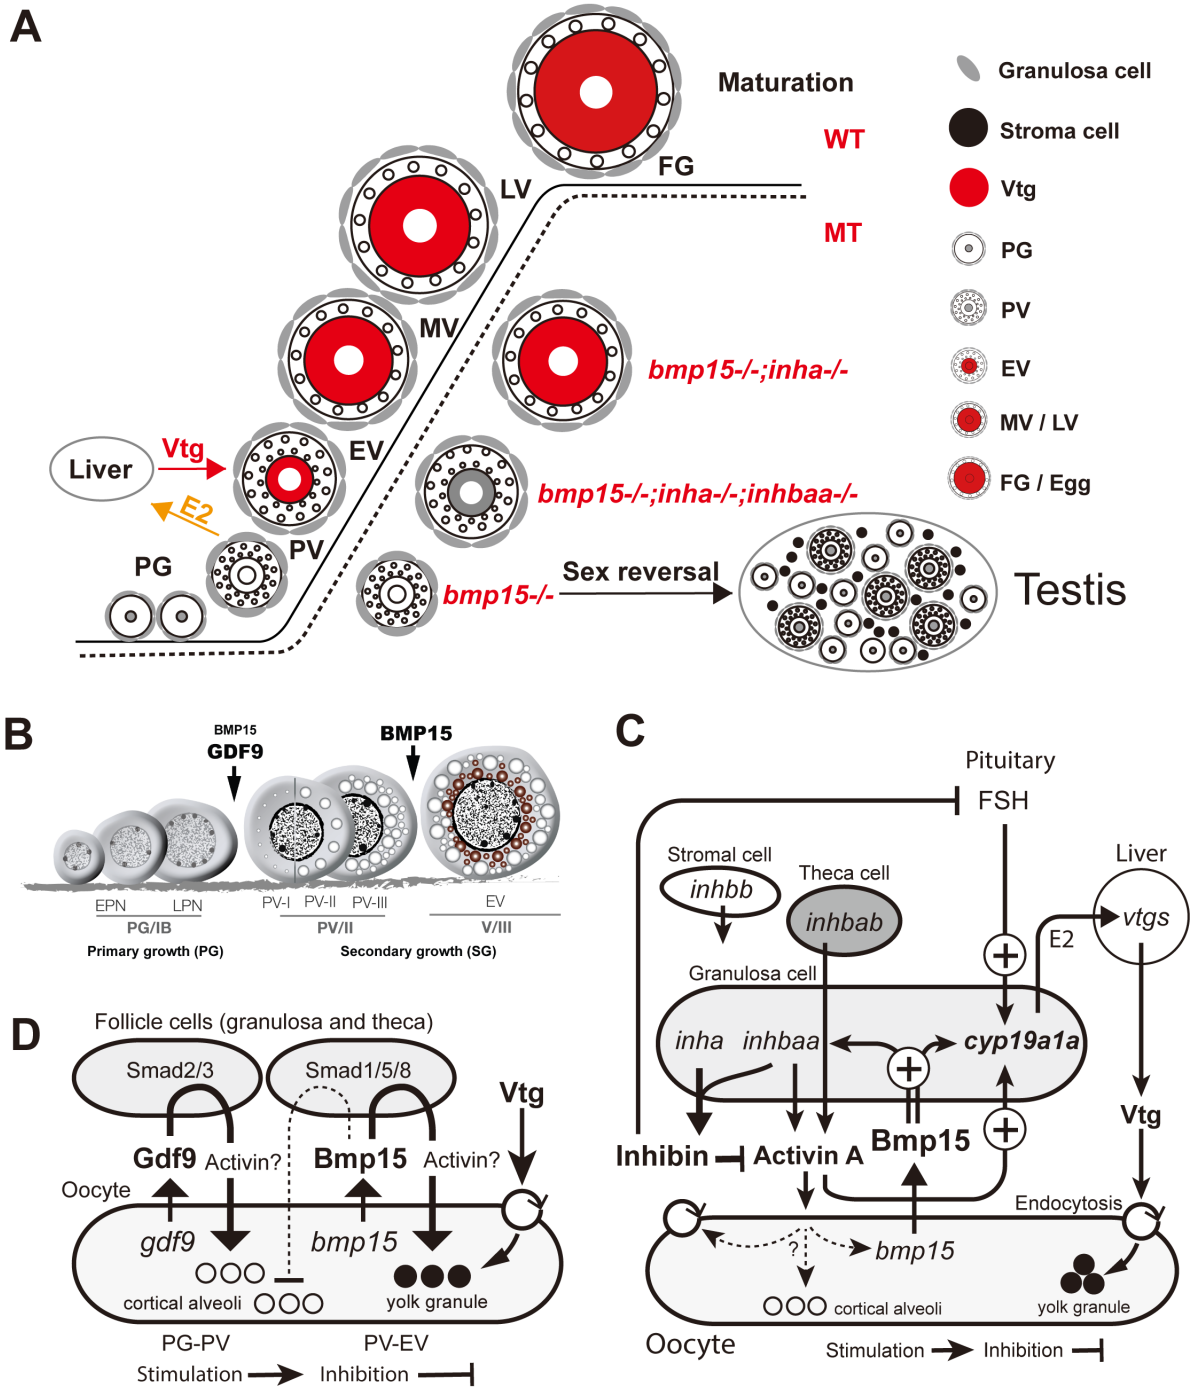

1770

1775

**Figure S1**

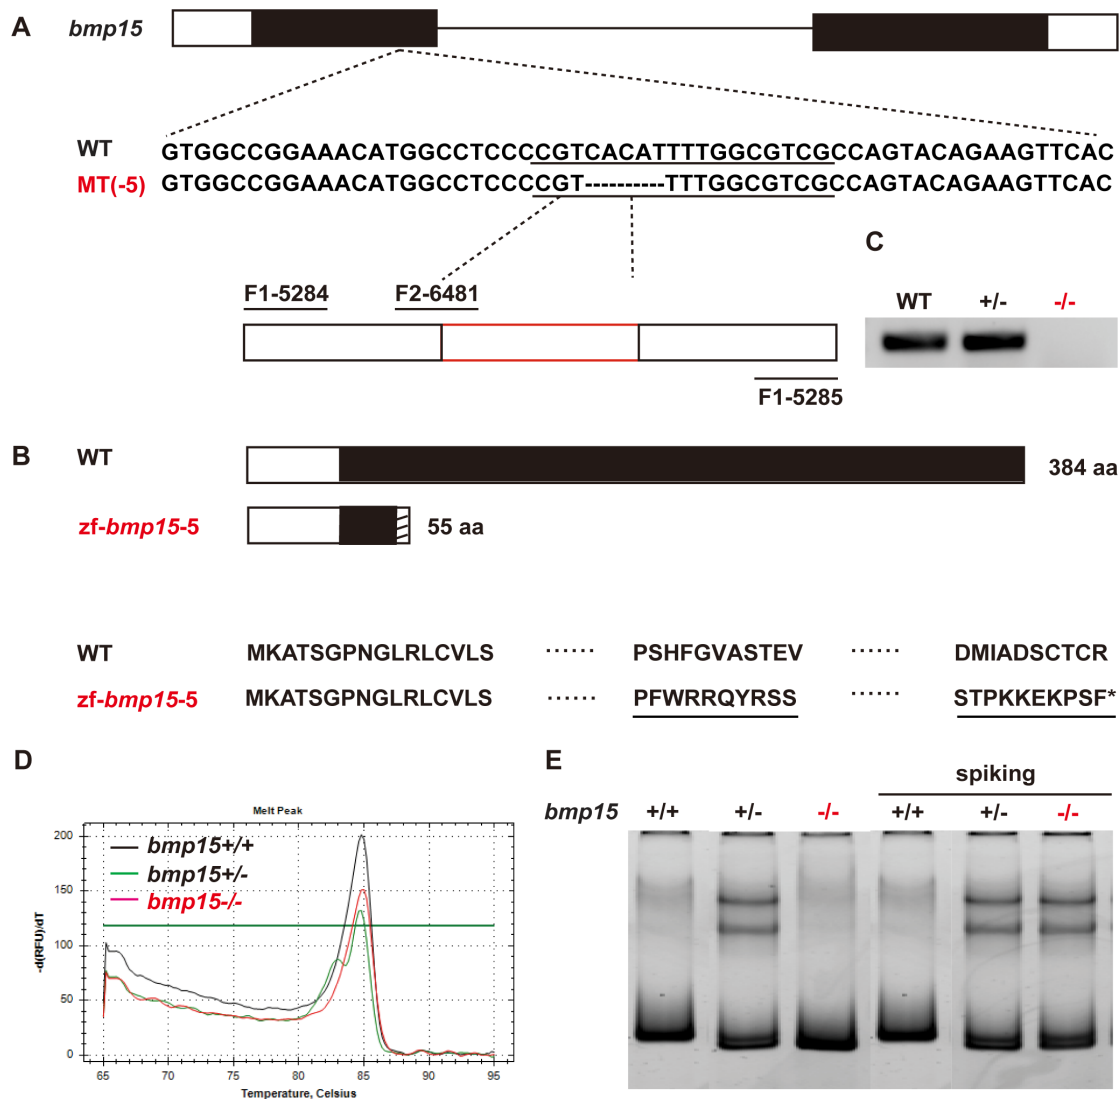

1780

1785

1790

**Figure S2**

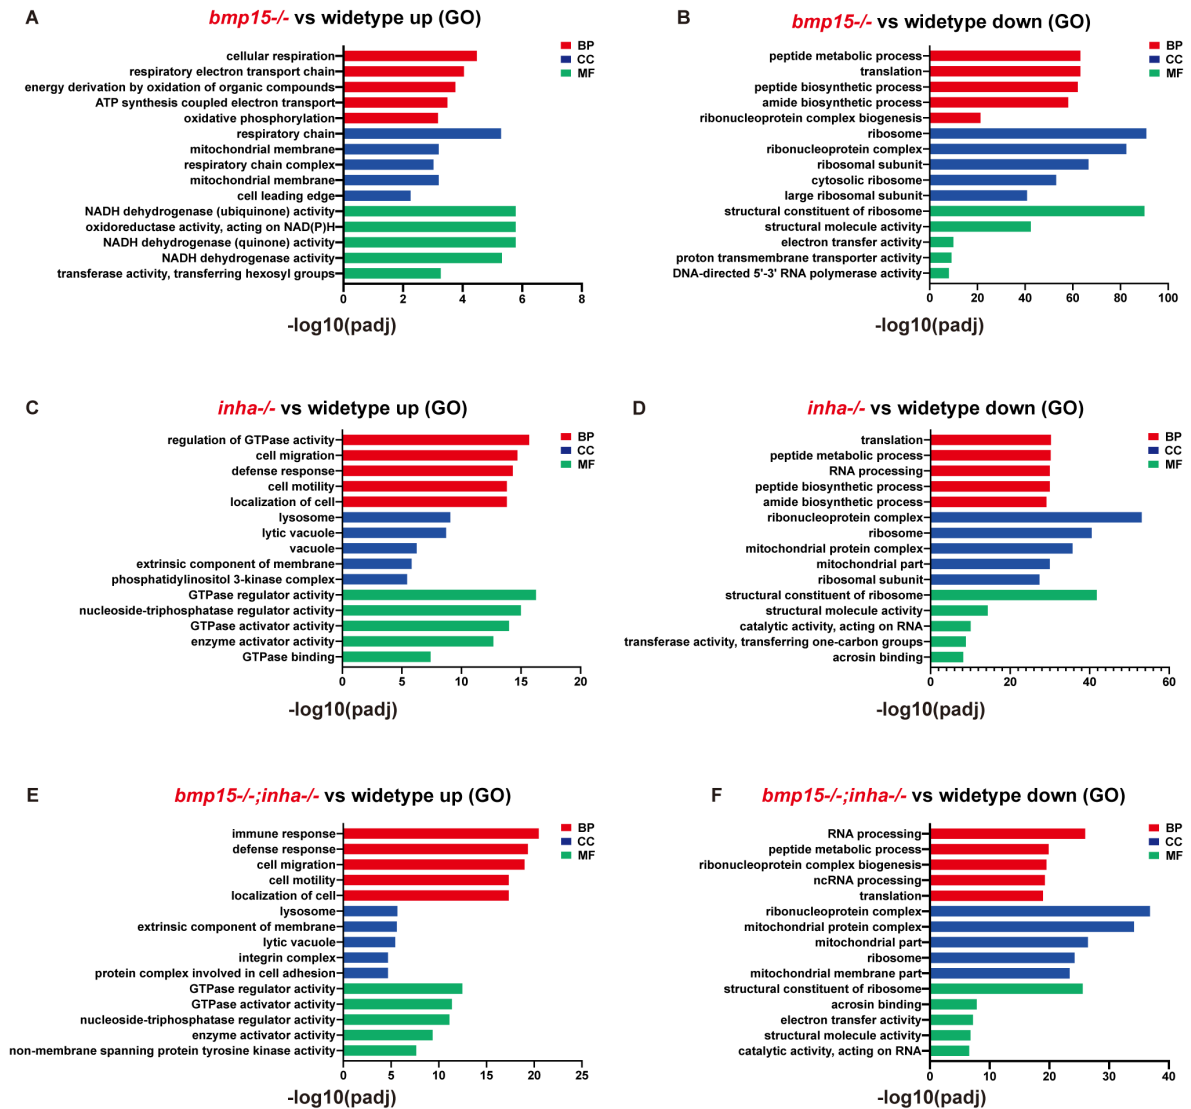

1795

1800

1805

Figure S3

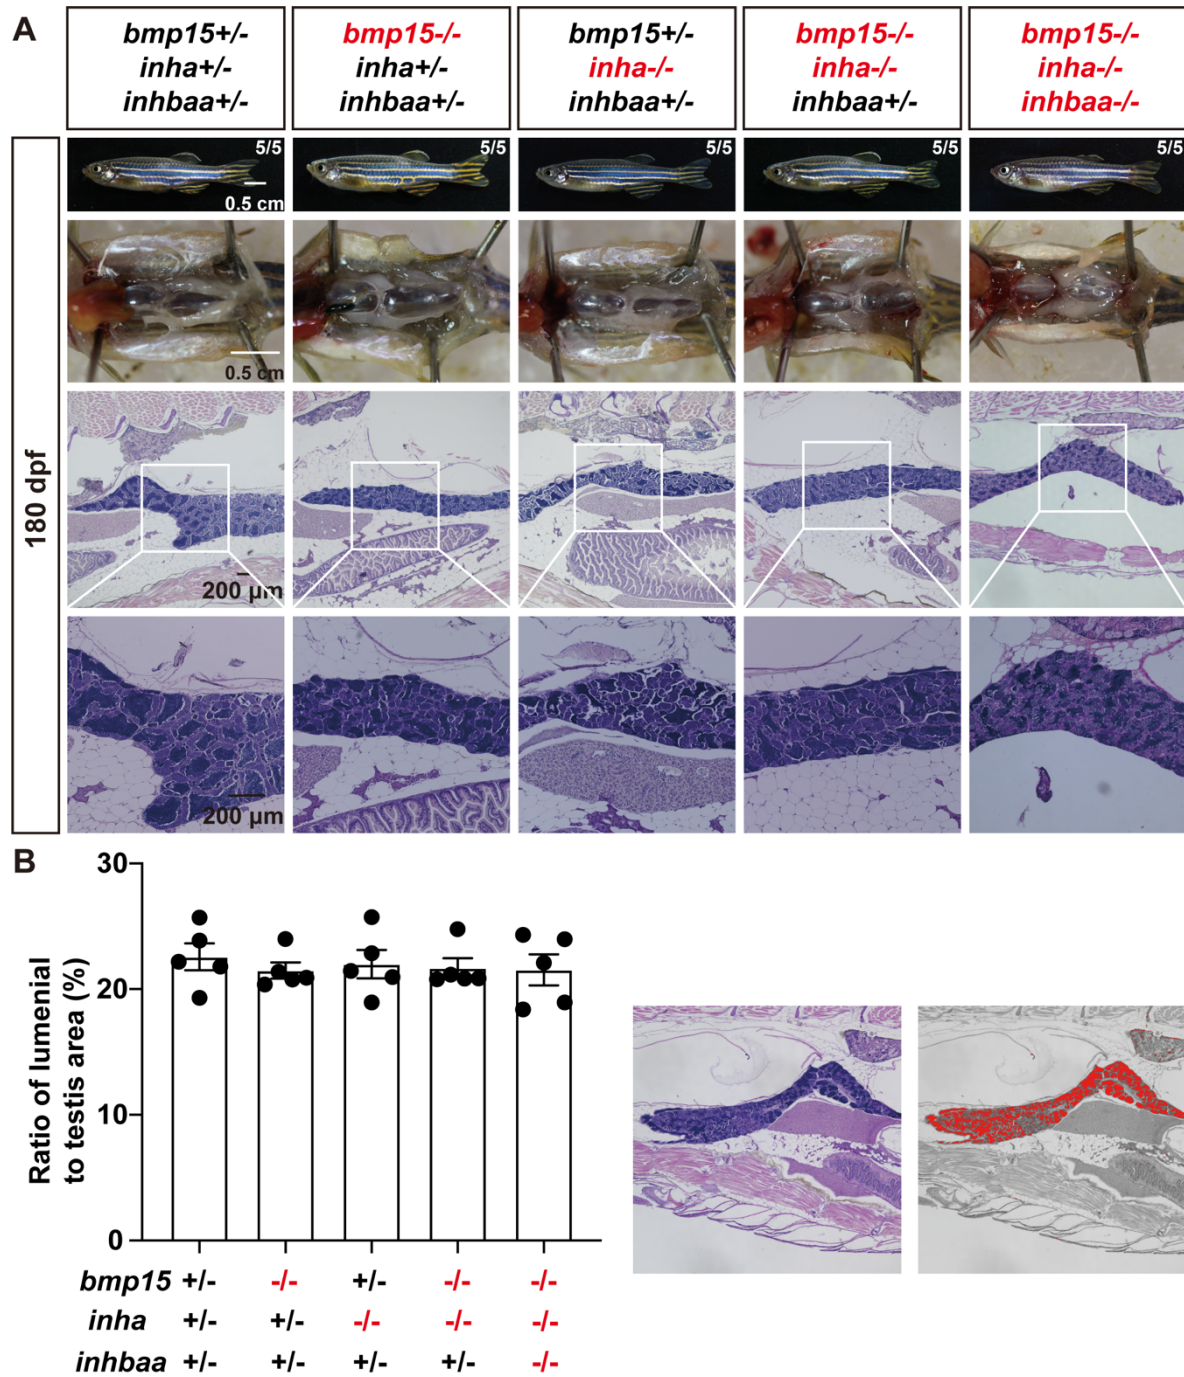

1810

1815
